# Supplementary material
Source: PubMed Central journal article supplement (PMC11182342)
Supplement: NIHMS1987901-supplement-SI.pdf [file NIHMS1987901-supplement-SI.pdf]

Supporting Information

**Cloth-Air Partitioning of Neutral Per- and Polyfluoroalkyl Substances (PFAS) in North Carolina Homes during the Indoor PFAS Assessment (IPA) Campaign**

Clara M. A. Eichler,<sup>1</sup> Naomi Y. Chang,<sup>1</sup> Elaine A. Cohen Hubal,<sup>2</sup> Daniel E. Amparo,<sup>1</sup> Jiaqi Zhou,<sup>1</sup> Jason D. Surratt,<sup>1,3</sup> Glenn C. Morrison,<sup>1</sup> and Barbara J. Turpin<sup>1\*</sup>

<sup>1</sup> University of North Carolina at Chapel Hill, Gillings School of Global Public Health, Department of Environmental Sciences and Engineering, Chapel Hill, NC, USA

<sup>2</sup> U.S. EPA, Center for Public Health and Environmental Assessment, Research Triangle Park, NC, USA

<sup>3</sup> University of North Carolina at Chapel Hill, College of Arts and Sciences, Department of Chemistry, Chapel Hill, NC, USA

\* Corresponding author: *bjturpin@email.unc.edu*

**Number of pages:** 81

**Number of figures:** 17

**Number of tables:** 25

**Table of Content:**

|                                                                                                                           |     |
|---------------------------------------------------------------------------------------------------------------------------|-----|
| <b>Table S1:</b> Samples collected during the IPA Campaign for (neutral and/or ionic) PFAS analysis.....                  | S5  |
| <b>Figure S1:</b> Sampling schedule for the IPA Campaign. ....                                                            | S5  |
| <b>Figure S2:</b> Schedule of the 6-day sampling visits, which occurred at t = 0, t = 3 months, and t = 6 months<br>..... | S6  |
| <b>Figure S3:</b> Home Survey, conducted before sampling started .....                                                    | S24 |
| <b>Figure S4:</b> Home Exit Survey, administered at the end of the last sampling visit .....                              | S29 |

|                                                                                                                                                                                                                               |     |
|-------------------------------------------------------------------------------------------------------------------------------------------------------------------------------------------------------------------------------|-----|
| <b>Figure S5:</b> Activity Checklist, one page for every day of each 6-day sampling period .....                                                                                                                              | S30 |
| <b>Figure S6:</b> Activity Survey, conducted at the end of each 6-day sampling period. ....                                                                                                                                   | S32 |
| <b>Table S2:</b> Characteristics of homes participating in the IPA Campaign and associated indoor environmental conditions during the field sampling.....                                                                     | S33 |
| <b>Table S3:</b> Window opening behavior of participants during the 6-day sampling periods. ....                                                                                                                              | S34 |
| <b>Table S4:</b> PFAS analytes and mass-labeled standards, including CAS RNs, short names, and vendors....                                                                                                                    | S35 |
| <b>Table S5:</b> Physico-chemical properties of neutral PFAS included in this study .....                                                                                                                                     | S36 |
| <b>Table S6:</b> Air samples collected during the IPA Campaign .....                                                                                                                                                          | S37 |
| <b>Section S1: Additional Air Sampling Details.</b> .....                                                                                                                                                                     | S38 |
| <b>Section S2: Additional Cloth Sampling Details.</b> .....                                                                                                                                                                   | S38 |
| <b>Figure S7:</b> A) Cloth strips suspended on hangers (Sampler A) and B) a folded cloth piece placed in a dresser drawer (Sampler B) in a participant’s home. ....                                                           | S40 |
| <b>Section S3: Additional Sample Processing and Analysis Details</b> .....                                                                                                                                                    | S40 |
| <b>Section S4: Quality assurance and quality control</b> .....                                                                                                                                                                | S41 |
| <b>Table S7:</b> Extraction recoveries .....                                                                                                                                                                                  | S43 |
| <b>Table S8:</b> Neutral PFAS in air and cloth sample field blanks.....                                                                                                                                                       | S44 |
| <b>Table S9:</b> Instrument Detection Limits (IDLs) and Method Detection Limits (MDLs).....                                                                                                                                   | S47 |
| <b>Table S10:</b> Breakthrough tests during air sampling (N = 5). ....                                                                                                                                                        | S48 |
| <b>Table S11:</b> Pooled coefficients of variation (%) of duplicate air (N = 3) and cloth samples (N = 71) (including only data above MDL) .....                                                                              | S49 |
| <b>Table S12:</b> Pooled coefficient of variation (%) of repeat air (N = 30), cloth strip (N = 26) and cloth piece (N = 16) sample GC-MS analysis (including only data above MDL) .....                                       | S49 |
| <b>Table S13:</b> Recovery (%) of neutral PFAS (150 ng spiked mass per analyte) from cloth strips (positive controls) after 11.2 months of storage.....                                                                       | S49 |
| <b>Table S14:</b> Quantifying and qualifying ions used for PFAS analysis in SIM mode (EI source) .....                                                                                                                        | S50 |
| <b>Section S5: Calculation of across-home and within-home variability of total-air and gas-phase samples</b> .....                                                                                                            | S50 |
| <b>Figure S8:</b> Air concentration profiles for neutral PFAS in homes measured during A) the first sampling visit (t = 0), B) the second sampling visit (t = 3 months), and C) the third sampling visit (t = 6 months) ..... | S52 |

|                                                                                                                                                                                                                                                                                      |     |
|--------------------------------------------------------------------------------------------------------------------------------------------------------------------------------------------------------------------------------------------------------------------------------------|-----|
| <b>Table S15:</b> Neutral PFAS in total-air and gas-phase samples. ....                                                                                                                                                                                                              | S53 |
| <b>Table S16:</b> Neutral PFAS in suspended cloth strip samples (Sampler A).....                                                                                                                                                                                                     | S55 |
| <b>Figure S9:</b> Concentration profiles of neutral PFAS in suspended cloth strips (Sampler A) over the duration of deployment at the IPA Campaign homes. ....                                                                                                                       | S60 |
| <b>Section S6: Statistical analysis of total air and gas phase data</b> .....                                                                                                                                                                                                        | S61 |
| <b>Table S17:</b> Statistical comparison of total-air and gas-phase samples ( $\alpha = 0.05$ ) .....                                                                                                                                                                                | S61 |
| <b>Table S18:</b> Estimated characteristic time $\tau$ and measured equilibration time of neutral PFAS in cloth strips.....                                                                                                                                                          | S62 |
| <b>Table S19:</b> Cloth-air partition coefficients as $\log(K_{ca})$ for six neutral PFAS (3 months, 6 months, and overall average) .....                                                                                                                                            | S62 |
| <b>Figure S10:</b> $\log(K_{ca})$ of PFAS and different SVOCs over $\log(K_{oa})$ .....                                                                                                                                                                                              | S63 |
| <b>Figure S11:</b> $\log(K_{ca})$ and vapor pressure (means and standard deviations, see <b>Table S4</b> ) .....                                                                                                                                                                     | S64 |
| <b>Section S7: Temperature-dependence of <math>\log(K_{ca})</math></b> .....                                                                                                                                                                                                         | S65 |
| <b>Figure S12:</b> The equilibrium cloth-air partition coefficient $\log(K_{ca})$ and average temperature (1-month, 3-day and 24-hour averages) for A) 6:2 FTOH, B) 8:2 FTOH and 10:2 FTOH, and C) EtFOSA, MeFOSE, and EtFOSE.....                                                   | S66 |
| <b>Figure S13:</b> The equilibrium cloth-air partition coefficient $\log(K_{ca})$ and the reciprocal absolute temperature (1-month, 3-day and 24-hour averages) for 6:2 FTOH, 8:2 FTOH, 10:2 FTOH, EtFOSA, MeFOSE, and EtFOSE .....                                                  | S67 |
| <b>Figure S14:</b> Examples of the relationship between $\log(K_{ca})$ and the air concentration of A) 6:2 FTOH and B) MeFOSE in comparison to the relationship between the average temperature during air sampling ( $^{\circ}\text{C}$ ) and the respective air concentration..... | S68 |
| <b>Table S20:</b> Neutral PFAS in folded cloth piece samples (Sampler B).....                                                                                                                                                                                                        | S69 |
| <b>Figure S15:</b> Concentration profiles of neutral PFAS in folded cloth pieces (Sampler B) over the duration of deployment at the IPA Campaign homes .....                                                                                                                         | S72 |
| <b>Figure S16:</b> Mass-based concentration profiles of neutral PFAS in cotton clothing from the IPA Campaign homes.....                                                                                                                                                             | S73 |
| <b>Table S21:</b> Mass-based concentrations of neutral PFAS in household cotton clothing items .....                                                                                                                                                                                 | S74 |
| <b>Table S22:</b> Area-based concentrations of neutral PFAS in household cotton clothing items .....                                                                                                                                                                                 | S75 |
| <b>Section S8: Additional details about the clothing items analyzed for PFAS</b> .....                                                                                                                                                                                               | S76 |
| <b>Table S23:</b> Variability of neutral PFAS in total air and gas phase samples across and within homes .....                                                                                                                                                                       | S77 |

**Figure S17:** Concentrations of neutral PFAS in air during the first, second, and third sampling visits and average indoor temperature during sampling..... S77

**Table S24:** Spearman rank correlation coefficients for neutral PFAS measured in total air with other neutral PFAS species, building characteristics, and environmental conditions ..... S78

**Table S25:** Spearman rank correlation coefficients for neutral PFAS measured in the gas phase with other neutral PFAS species, building characteristics, and environmental conditions..... S79

**References** ..... S80

**Table S1:** Samples collected during the IPA Campaign for (neutral and/or ionic) PFAS analysis

| Indoor Environmental Media                     | Type of Sample                             | Approx. Number of Samples        |
|------------------------------------------------|--------------------------------------------|----------------------------------|
| Total air (gas + particle)                     | PUF-XAD2-PUF cartridges                    | 21 (this study)                  |
| Gas phase                                      | PUF-XAD2-PUF cartridges                    | 25 (this study)                  |
| Airborne particles (PM <sub>2.5</sub> )        | Quartz-fiber filters (QFFs)                | 90                               |
| Airborne particles (Total suspended particles) | Quartz-fiber filters (QFFs)                | 25                               |
| Gas phase (cloth-air partitioning)             | Suspended cotton cloth strips              | 72 (this study)                  |
| Cloth (cloth-cloth partitioning)               | Folded cotton cloth pieces                 | 146 (91 analyzed for this study) |
| Clothing/textiles                              | Cotton clothing items                      | 11 (this study)                  |
| Airborne particles                             | Heating and air conditioning (HAC) filters | 19                               |
| House dust                                     | Vacuumed dust                              | 21                               |
| House dust                                     | Dust grab sample                           | 20                               |
| Dryer lint trap                                | Dryer lint                                 | 27                               |
| Surface film                                   | Window wipes                               | 152                              |
| Surface film                                   | Glass slabs, wall-mounted                  | 378                              |
| Water                                          | Tap water                                  | 60                               |
| Indoor moisture                                | HAC condensate                             | 9                                |

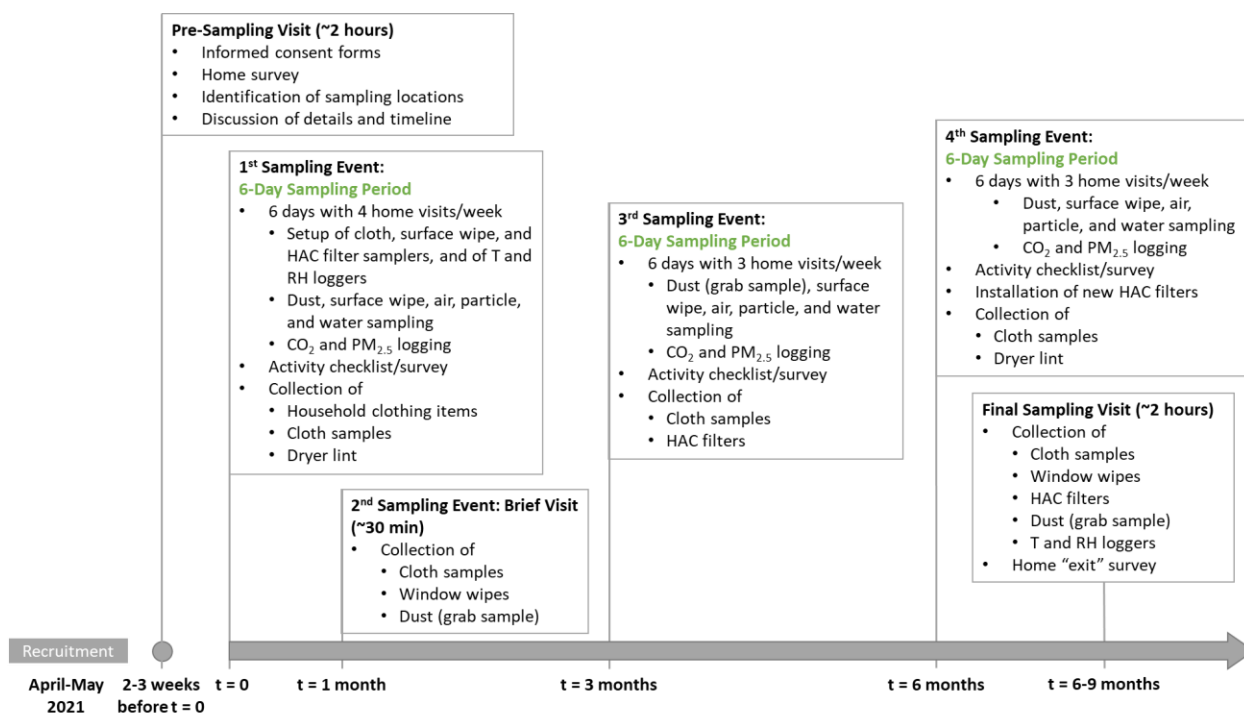

**Figure S1:** Sampling schedule for the IPA Campaign.

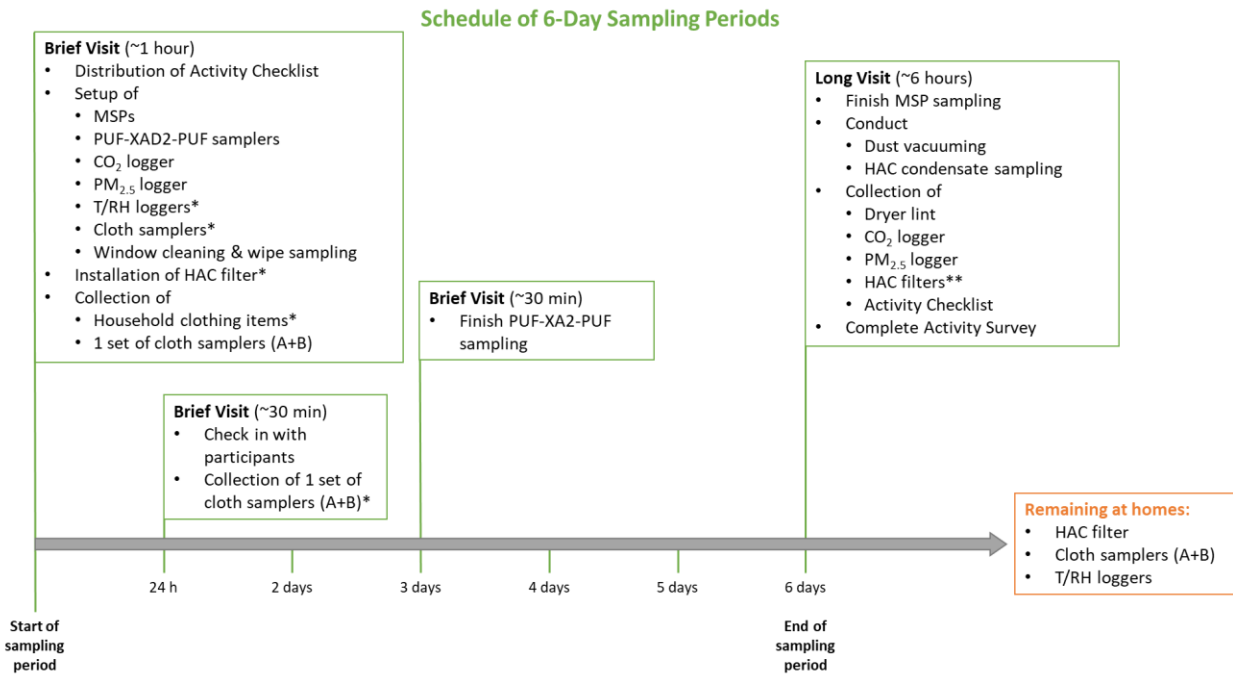

**Figure S2:** Schedule of the 6-day sampling visits, which occurred at  $t = 0$ ,  $t = 3$  months, and  $t = 6$  months. \*Event occurred only during the first sampling period, \*\*event occurred only during the second and third sampling period.

| 1. Demographic Data                         |                                                                                                    |                                                                                                                  |                                                                  |
|---------------------------------------------|----------------------------------------------------------------------------------------------------|------------------------------------------------------------------------------------------------------------------|------------------------------------------------------------------|
| Total number of occupants:                  | Number of occupants 0-14 years old:                                                                | Number of occupants 15-21 years old:                                                                             | Number of occupants 21+ years old:                               |
|                                             |                                                                                                    |                                                                                                                  |                                                                  |
| Are there any pets in the house?            | Y    N                                                                                             |                                                                                                                  |                                                                  |
|                                             | If yes, do any go outdoors?                                                                        | Y    N    Don't Know                                                                                             |                                                                  |
|                                             | Are there any pet doors?                                                                           | Y    N    Don't Know                                                                                             |                                                                  |
|                                             | If there is a litter box indoors, what room is it located in?                                      |                                                                                                                  |                                                                  |
| 2. Cooking Appliances and Habits            |                                                                                                    |                                                                                                                  |                                                                  |
| What type of stove do you have?             | Gas                  Electric Coil                  Electric Smooth Top                  Induction | Don't Know    Other (specify): _____                                                                             |                                                                  |
| When was the stove bought?                  | Before 2000                  2000 – 2009                  2010 – 2014                              | 2015 – 2020                  in 2021                  Don't Know                                                 |                                                                  |
| Do you have an exhaust fan above the stove? | Y    N    Don't Know                                                                               |                                                                                                                  |                                                                  |
|                                             | If yes, how frequently is it used?                                                                 | Every time                  Most of the time<br>Sometimes                  Never<br>Certain conditions (expand): |                                                                  |
|                                             | If yes, does it vent outside or inside, above the stove?                                           | Outside                  Inside                  Don't Know                                                      |                                                                  |
| What type of cookware do you have?          | Teflon-coated non-stick                  Ceramic-coated non-stick                                  |                                                                                                                  | Unknown non-stick coated                  Other (specify): _____ |
|                                             | Which type of cookware is used most frequently and around when was it purchased?                   |                                                                                                                  |                                                                  |
| How frequently is the oven used?            | Daily months                  Weekly                  Monthly                  Every couple of     |                                                                                                                  |                                                                  |
|                                             | Annually                  Don't Know                  NA                                           |                                                                                                                  |                                                                  |

|                                                            |                                                                                                                                            |                                                                                                                                      |
|------------------------------------------------------------|--------------------------------------------------------------------------------------------------------------------------------------------|--------------------------------------------------------------------------------------------------------------------------------------|
|                                                            | What type of pans/cookware are used in the oven?                                                                                           | Teflon-coated non-stick pans      Ceramic/glass<br>Other (specify): _____                                                            |
| How frequently is microwaved popcorn consumed in the home? | Weekly      Monthly      Every 3 – 6 months      Annually      Never                                                                       |                                                                                                                                      |
|                                                            | Type of popcorn: pre-packaged bag      Bulk/Loose      Other:<br>_____                                                                     |                                                                                                                                      |
| How frequently are frozen, ready-made meals consumed?      | Weekly      Monthly      Every 3 – 6 months      Annually      Never                                                                       |                                                                                                                                      |
| How frequently is takeout consumed in the home?            | Weekly      Monthly      Every 3 – 6 months      Annually      Never                                                                       |                                                                                                                                      |
| Where do you get water for general household use?          | Public or commercial water system. Name:<br>_____                                                                                          |                                                                                                                                      |
|                                                            | Private well      Other (specify): _____<br>Don't Know                                                                                     |                                                                                                                                      |
| Which water source is used most often for cooking?         | Tap or faucet      Bottled water      Both, tap and bottled water<br>Don't Know                                                            |                                                                                                                                      |
| Do you treat or filter your water at home?                 | No      Softener      Charcoal Filter      Reverse Osmosis<br>Distilling      Multi-stage filter      Don't Know<br>Other (specify): _____ |                                                                                                                                      |
|                                                            | Is this treatment:                                                                                                                         | For the entire house      On the kitchen faucet<br>Refrigerator      Countertop      Pitcher<br>Other (specify): _____<br>Don't Know |
|                                                            | When do you use filtered water?                                                                                                            | Drinking water      Cooking      Boiling water<br>Brushing teeth      Other (specify):<br>_____<br>Don't Know                        |
|                                                            | How often is the water filter replaced?                                                                                                    | 0 – 3 months      4 – 6 months      7 – 12 months<br>1 – 5 years      5+ years      Don't Know                                       |



|                                                        |                                                                                 |                                       |                                                                          |                             |                  |
|--------------------------------------------------------|---------------------------------------------------------------------------------|---------------------------------------|--------------------------------------------------------------------------|-----------------------------|------------------|
|                                                        | How old is the filter you're using right now?                                   | 1 month<br>1 – 5 years                | 1 – 6 months<br>5+ years                                                 | 7 – 12 months<br>Don't Know |                  |
| <b>3. Heating/Cooling Appliances and Habits</b>        |                                                                                 |                                       |                                                                          |                             |                  |
| How do you heat your home?                             | Natural gas<br>Don't Know                                                       | Oil furnace<br>Other (specify): _____ | Wood/pellet stove                                                        | Electric/heat pump          |                  |
| Do you use a humidifier or dehumidifier?               | Humidifier    Dehumidifier    Both    Neither    Don't Know                     |                                       |                                                                          |                             |                  |
|                                                        | If yes, where is it/are they located?                                           |                                       |                                                                          |                             |                  |
|                                                        | If yes, how frequently is it used (e.g., constantly, sometimes, rarely, never)? |                                       | Humidifier                                                               | Dehumidifier                |                  |
|                                                        |                                                                                 | Winter                                |                                                                          |                             |                  |
|                                                        |                                                                                 | Spring                                |                                                                          |                             |                  |
| Summer                                                 |                                                                                 |                                       |                                                                          |                             |                  |
| How often do you change the filter?                    |                                                                                 |                                       |                                                                          |                             |                  |
| Do you have a fireplace?                               | Y    N    Don't Know                                                            |                                       |                                                                          |                             |                  |
|                                                        | What is burned in the fireplace?                                                | Wood<br>Don't Know                    | Artificial Logs<br>Other, e.g., unvented gas or coal (specify):<br>_____ | Vented Gas Flame            |                  |
|                                                        | If yes, how frequently do you use it?                                           | <b>Winter</b><br>DK                   | Daily                                                                    | Weekly                      | Monthly    Never |
| <b>Spring</b><br>DK                                    |                                                                                 | Daily                                 | Weekly                                                                   | Monthly    Never            |                  |
| <b>Summer</b><br>DK                                    |                                                                                 | Daily                                 | Weekly                                                                   | Monthly    Never            |                  |
| <b>Fall</b><br>DK                                      |                                                                                 | Daily                                 | Weekly                                                                   | Monthly    Never            |                  |
| Does this home have central heating and cooling (HAC)? | Y    N    Don't Know                                                            |                                       |                                                                          |                             |                  |
|                                                        | If yes, do you know the make, model, and power                                  |                                       |                                                                          |                             |                  |

|                                                                                                             |                                                                                                                                                                                                          |                                                                                                                                                                                                                                                                                                                                                                                                                                                                                                                           |               |       |        |         |       |       |  |  |  |  |               |       |        |         |       |       |  |  |  |  |               |       |        |         |       |       |  |  |  |  |
|-------------------------------------------------------------------------------------------------------------|----------------------------------------------------------------------------------------------------------------------------------------------------------------------------------------------------------|---------------------------------------------------------------------------------------------------------------------------------------------------------------------------------------------------------------------------------------------------------------------------------------------------------------------------------------------------------------------------------------------------------------------------------------------------------------------------------------------------------------------------|---------------|-------|--------|---------|-------|-------|--|--|--|--|---------------|-------|--------|---------|-------|-------|--|--|--|--|---------------|-------|--------|---------|-------|-------|--|--|--|--|
|                                                                                                             | <p>rating of the HAC unit?</p> <p><i>If participant agreed earlier, take a photo, including the tag on the side.</i></p> <p><u>Name of photographer:</u></p>                                             |                                                                                                                                                                                                                                                                                                                                                                                                                                                                                                                           |               |       |        |         |       |       |  |  |  |  |               |       |        |         |       |       |  |  |  |  |               |       |        |         |       |       |  |  |  |  |
|                                                                                                             | <p>If yes, do you know the make and model of the thermostat?</p> <p><i>If participant agreed earlier, take a photo.</i></p> <p><u>Name of photographer:</u></p>                                          |                                                                                                                                                                                                                                                                                                                                                                                                                                                                                                                           |               |       |        |         |       |       |  |  |  |  |               |       |        |         |       |       |  |  |  |  |               |       |        |         |       |       |  |  |  |  |
|                                                                                                             | <p>If yes, how many HAC filters are installed in your home and where are they located?</p>                                                                                                               |                                                                                                                                                                                                                                                                                                                                                                                                                                                                                                                           |               |       |        |         |       |       |  |  |  |  |               |       |        |         |       |       |  |  |  |  |               |       |        |         |       |       |  |  |  |  |
|                                                                                                             | <p>If yes, what type of HAC filter is it, what are the dimensions, and how frequently is it replaced?</p> <p><i>If participant agreed earlier, take a photo.</i></p> <p><u>Name of photographer:</u></p> |                                                                                                                                                                                                                                                                                                                                                                                                                                                                                                                           |               |       |        |         |       |       |  |  |  |  |               |       |        |         |       |       |  |  |  |  |               |       |        |         |       |       |  |  |  |  |
|                                                                                                             | <p>If no, what type of device is used?</p>                                                                                                                                                               |                                                                                                                                                                                                                                                                                                                                                                                                                                                                                                                           |               |       |        |         |       |       |  |  |  |  |               |       |        |         |       |       |  |  |  |  |               |       |        |         |       |       |  |  |  |  |
| <p>Approximately how often per season are windows in the following rooms open for more than 15 minutes?</p> | <p>Living Room</p>                                                                                                                                                                                       | <table> <tr> <td><b>Winter</b></td> <td>Daily</td> <td>Weekly</td> <td>Monthly</td> <td>Never</td> </tr> <tr> <td>DK NA</td> <td></td> <td></td> <td></td> <td></td> </tr> <tr> <td><b>Spring</b></td> <td>Daily</td> <td>Weekly</td> <td>Monthly</td> <td>Never</td> </tr> <tr> <td>DK NA</td> <td></td> <td></td> <td></td> <td></td> </tr> <tr> <td><b>Summer</b></td> <td>Daily</td> <td>Weekly</td> <td>Monthly</td> <td>Never</td> </tr> <tr> <td>DK NA</td> <td></td> <td></td> <td></td> <td></td> </tr> </table> | <b>Winter</b> | Daily | Weekly | Monthly | Never | DK NA |  |  |  |  | <b>Spring</b> | Daily | Weekly | Monthly | Never | DK NA |  |  |  |  | <b>Summer</b> | Daily | Weekly | Monthly | Never | DK NA |  |  |  |  |
| <b>Winter</b>                                                                                               | Daily                                                                                                                                                                                                    | Weekly                                                                                                                                                                                                                                                                                                                                                                                                                                                                                                                    | Monthly       | Never |        |         |       |       |  |  |  |  |               |       |        |         |       |       |  |  |  |  |               |       |        |         |       |       |  |  |  |  |
| DK NA                                                                                                       |                                                                                                                                                                                                          |                                                                                                                                                                                                                                                                                                                                                                                                                                                                                                                           |               |       |        |         |       |       |  |  |  |  |               |       |        |         |       |       |  |  |  |  |               |       |        |         |       |       |  |  |  |  |
| <b>Spring</b>                                                                                               | Daily                                                                                                                                                                                                    | Weekly                                                                                                                                                                                                                                                                                                                                                                                                                                                                                                                    | Monthly       | Never |        |         |       |       |  |  |  |  |               |       |        |         |       |       |  |  |  |  |               |       |        |         |       |       |  |  |  |  |
| DK NA                                                                                                       |                                                                                                                                                                                                          |                                                                                                                                                                                                                                                                                                                                                                                                                                                                                                                           |               |       |        |         |       |       |  |  |  |  |               |       |        |         |       |       |  |  |  |  |               |       |        |         |       |       |  |  |  |  |
| <b>Summer</b>                                                                                               | Daily                                                                                                                                                                                                    | Weekly                                                                                                                                                                                                                                                                                                                                                                                                                                                                                                                    | Monthly       | Never |        |         |       |       |  |  |  |  |               |       |        |         |       |       |  |  |  |  |               |       |        |         |       |       |  |  |  |  |
| DK NA                                                                                                       |                                                                                                                                                                                                          |                                                                                                                                                                                                                                                                                                                                                                                                                                                                                                                           |               |       |        |         |       |       |  |  |  |  |               |       |        |         |       |       |  |  |  |  |               |       |        |         |       |       |  |  |  |  |

|                                |                                                                  |                        |        |         |         |       |
|--------------------------------|------------------------------------------------------------------|------------------------|--------|---------|---------|-------|
|                                |                                                                  | <b>Fall</b><br>DK NA   | Daily  | Weekly  | Monthly | Never |
|                                | Kitchen                                                          | <b>Winter</b><br>DK NA | Daily  | Weekly  | Monthly | Never |
|                                |                                                                  | <b>Spring</b><br>DK NA | Daily  | Weekly  | Monthly | Never |
|                                |                                                                  | <b>Summer</b><br>DK NA | Daily  | Weekly  | Monthly | Never |
|                                |                                                                  | <b>Fall</b><br>DK NA   | Daily  | Weekly  | Monthly | Never |
|                                | Bathroom                                                         | <b>Winter</b><br>DK NA | Daily  | Weekly  | Monthly | Never |
|                                |                                                                  | <b>Spring</b><br>DK NA | Daily  | Weekly  | Monthly | Never |
|                                |                                                                  | <b>Summer</b><br>DK NA | Daily  | Weekly  | Monthly | Never |
|                                |                                                                  | <b>Fall</b><br>DK NA   | Daily  | Weekly  | Monthly | Never |
|                                | Master Bedroom                                                   | <b>Winter</b><br>DK NA | Daily  | Weekly  | Monthly | Never |
|                                |                                                                  | <b>Spring</b><br>DK NA | Daily  | Weekly  | Monthly | Never |
|                                |                                                                  | <b>Summer</b><br>DK NA | Daily  | Weekly  | Monthly | Never |
|                                |                                                                  | <b>Fall</b><br>DK NA   | Daily  | Weekly  | Monthly | Never |
|                                | Other rooms in<br>which sampling<br>may take place:<br><br>_____ | <b>Winter</b><br>DK NA | Daily  | Weekly  | Monthly | Never |
|                                |                                                                  | <b>Spring</b><br>DK NA | Daily  | Weekly  | Monthly | Never |
|                                |                                                                  | <b>Summer</b><br>DK NA | Daily  | Weekly  | Monthly | Never |
| <b>Fall</b><br>DK NA           |                                                                  | Daily                  | Weekly | Monthly | Never   |       |
| <b>4. Home Characteristics</b> |                                                                  |                        |        |         |         |       |

|                                                                                                                                                                                                          |                             |                       |                       |       |       |            |
|----------------------------------------------------------------------------------------------------------------------------------------------------------------------------------------------------------|-----------------------------|-----------------------|-----------------------|-------|-------|------------|
| About when was your home first built?                                                                                                                                                                    | 2015 – Present              |                       | 1960 – 1974           |       |       |            |
|                                                                                                                                                                                                          | 2005 – 2014                 |                       | 1945 – 1959           |       |       |            |
|                                                                                                                                                                                                          | 1995 – 2004                 |                       | 1900 – 1944           |       |       |            |
|                                                                                                                                                                                                          | 1985 – 1994                 |                       | Before 1900           |       |       |            |
|                                                                                                                                                                                                          | 1975 – 1984                 |                       | Don't Know            |       |       |            |
| When did you move into this house?                                                                                                                                                                       | 2015 – Present              |                       | 1970 – 1979           |       |       |            |
|                                                                                                                                                                                                          | 2005 – 2014                 |                       | 1960 – 1969           |       |       |            |
|                                                                                                                                                                                                          | 2000 – 2004                 |                       | 1959 or earlier       |       |       |            |
|                                                                                                                                                                                                          | 1990 – 1999                 |                       | Don't Know            |       |       |            |
|                                                                                                                                                                                                          | 1980 – 1989                 |                       |                       |       |       |            |
| What type of home is this?                                                                                                                                                                               | Apartment                   | Townhouse             | Detached              | Condo |       |            |
|                                                                                                                                                                                                          | Other: _____                |                       |                       |       |       |            |
| How many stories are in this building? (count only floors with finished rooms for living purposes or finished basement)                                                                                  |                             |                       |                       |       |       |            |
| On which floor do you spend most of your waking time?                                                                                                                                                    | Basement                    | 1 <sup>st</sup> floor | 2 <sup>nd</sup> floor | Attic | Other | Don't Know |
| In the past year has there been a major renovation to this house or apartment, such as adding a room, putting up or taking down a wall, replacing windows, or refinishing floors? When was the last one? | Yes, when was the last one? |                       |                       |       |       |            |
|                                                                                                                                                                                                          | Yes, I don't know when      |                       |                       |       |       |            |
|                                                                                                                                                                                                          | Not renovated               |                       | Don't Know            |       |       |            |
| In the past year was the inside of this house or apartment painted?                                                                                                                                      | Date:                       |                       | No. of Rooms:         |       |       |            |
|                                                                                                                                                                                                          | Yes, it was painted on      |                       |                       |       |       |            |

|                                                                                                                                                 |                                                                                                                                                                           |                                                                                   |                         |
|-------------------------------------------------------------------------------------------------------------------------------------------------|---------------------------------------------------------------------------------------------------------------------------------------------------------------------------|-----------------------------------------------------------------------------------|-------------------------|
| When was the last one?<br>On how many rooms?                                                                                                    | Yes, it was painted but I don't know when                                                                                                                                 |                                                                                   |                         |
|                                                                                                                                                 | Not painted                                                                                                                                                               | Don't Know                                                                        |                         |
|                                                                                                                                                 | If yes, which room was painted and what was the approximate surface area painted?<br><br><i>*If participant doesn't know SA, ask if you can go to room to estimate it</i> |                                                                                   |                         |
| Please indicate all rooms that have carpets or rugs along with when they were installed in the home and whether they are stain/water repellent. | Room                                                                                                                                                                      | Installed                                                                         | Stain-/Water-repellant? |
|                                                                                                                                                 | Living Room                                                                                                                                                               | Before 2000<br>2000 – 2009<br>2010 – 2014<br>2015 – 2020<br>in 2021<br>Don't Know | Yes    No    Don't Know |
|                                                                                                                                                 | Kitchen                                                                                                                                                                   | Before 2000<br>2000 – 2009<br>2010 – 2014<br>2015 – 2020<br>in 2021<br>Don't Know | Yes    No    Don't Know |
|                                                                                                                                                 |                                                                                                                                                                           |                                                                                   |                         |

|  |                |                                                                                                              |            |    |            |
|--|----------------|--------------------------------------------------------------------------------------------------------------|------------|----|------------|
|  | Bathroom       | <p>Before 2000</p> <p>2000 – 2009</p> <p>2010 – 2014</p> <p>2015 – 2020</p> <p>in 2021</p> <p>Don't Know</p> | Yes        | No | Don't Know |
|  | Master Bedroom | <p>Before 2000</p> <p>2000 – 2009</p> <p>2010 – 2014</p> <p>2015 – 2020</p> <p>in 2021</p> <p>Don't Know</p> | Yes        | No | Don't Know |
|  | Room:<br>_____ | <p>Before 2000</p> <p>2000 – 2009</p> <p>2010 – 2014</p> <p>2015 – 2020</p> <p>in 2021</p> <p>Don't Know</p> | Yes        | No | Don't Know |
|  | Room:<br>_____ | <p>Before 2000</p> <p>2000 – 2009</p> <p>2010 – 2014</p> <p>2015 – 2020</p> <p>in 2021</p> <p>Don't Know</p> | Yes        | No | Don't Know |
|  | Yes            | No                                                                                                           | Don't Know |    |            |

|                                                                                                                        |                                                                 |                                                                                 |                        |                           |
|------------------------------------------------------------------------------------------------------------------------|-----------------------------------------------------------------|---------------------------------------------------------------------------------|------------------------|---------------------------|
| Were any carpets or rugs removed from the home since you've lived here?                                                | If yes, how old was the carpet/rug that was removed?            | Before 2000<br>2015 – 2020                                                      | 2000 – 2009<br>in 2021 | 2010 – 2014<br>Don't Know |
|                                                                                                                        | When was the carpet or rug removed?                             | Before 2000<br>2015 – 2020                                                      | 2000 – 2009<br>in 2021 | 2010 – 2014<br>Don't Know |
| Has any furniture been treated with stain- or water-repellant chemicals since you bought it?                           | Yes      No      Don't Know                                     |                                                                                 |                        |                           |
|                                                                                                                        | If yes, when was the furniture installed?                       | Before 2000<br>2015 – 2020                                                      | 2000 – 2009<br>in 2021 | 2010 – 2014<br>Don't Know |
|                                                                                                                        | If yes, when was it last treated?                               | Before 2000<br>2015 – 2020                                                      | 2000 – 2009<br>in 2021 | 2010 – 2014<br>Don't Know |
|                                                                                                                        | What room is the stain or water-repellant treated item located? |                                                                                 |                        |                           |
|                                                                                                                        | What product was used?                                          | Scotchgard    Rust-Oleum NeverWet<br>303 Fabric Guard<br>Other (specify): _____ |                        |                           |
|                                                                                                                        |                                                                 |                                                                                 |                        |                           |
| Within the last six months were rugs, drapes, or furniture professionally cleaned? Inside the house? When? What items? |                                                                 | Date:                                                                           | No. of Items:          |                           |
|                                                                                                                        | Yes, cleaned on                                                 |                                                                                 |                        |                           |
|                                                                                                                        | Yes, but don't know when                                        |                                                                                 |                        |                           |
|                                                                                                                        | No professional cleaning                                        | Don't Know                                                                      |                        |                           |
|                                                                                                                        | Yes      No      Don't Know                                     |                                                                                 |                        |                           |

|                                                                                     |                                                                      |                                                           |              |                 |
|-------------------------------------------------------------------------------------|----------------------------------------------------------------------|-----------------------------------------------------------|--------------|-----------------|
| Has any non-carpet flooring been installed since you've lived in the home?          | If yes, what type?                                                   | Hardwood                                                  | Vinyl        | Laminate        |
|                                                                                     |                                                                      | Linoleum                                                  | Ceramic/tile | Engineered wood |
|                                                                                     |                                                                      | Other: _____                                              |              | Don't Know      |
|                                                                                     |                                                                      |                                                           |              |                 |
| When was the floor in the main living area last refinished?                         | When was it installed?                                               | Before 2000                                               | 2000 – 2009  | 2010 – 2014     |
|                                                                                     |                                                                      | 2015 – 2020                                               | in 2021      | Don't Know      |
|                                                                                     |                                                                      | Where was the flooring installed?                         |              |                 |
|                                                                                     |                                                                      | Approximately what size (area) of flooring was installed? | <100 sq ft   | 100 – 200 sq ft |
|                                                                                     |                                                                      | >300 sq ft                                                | Don't Know   |                 |
| Was your home furnished when you moved in?                                          | Yes                                                                  | No                                                        | Don't Know   |                 |
|                                                                                     | If yes, do you know anything about the age/history of the furniture? |                                                           |              |                 |
| If no, what large pieces of furniture did you install and when were they installed? | Couch                                                                |                                                           |              |                 |
|                                                                                     | Dining Room Set                                                      |                                                           |              |                 |
|                                                                                     | Cabinets                                                             |                                                           |              |                 |
|                                                                                     | TV/TV Furniture                                                      |                                                           |              |                 |
|                                                                                     | Beds/Mattresses                                                      |                                                           |              |                 |
|                                                                                     | Chairs                                                               |                                                           |              |                 |
|                                                                                     | Tables                                                               |                                                           |              |                 |
|                                                                                     | Countertops                                                          |                                                           |              |                 |
| If no, was any of it stain or water-repellant when you purchased it?                | Yes                                                                  | No                                                        | Don't Know   |                 |
| <b>5. Cleaning Habits</b>                                                           |                                                                      |                                                           |              |                 |



|                                                        | Yes                                                                                                                                                                                         | No                      | Don't Know             |            |         |    |
|--------------------------------------------------------|---------------------------------------------------------------------------------------------------------------------------------------------------------------------------------------------|-------------------------|------------------------|------------|---------|----|
| Is there a washing machine and/or dryer in the home?   | If yes, how frequently is laundry done?                                                                                                                                                     |                         | Every few days         | Weekly     |         |    |
|                                                        |                                                                                                                                                                                             |                         | Every few weeks        | Monthly    |         |    |
|                                                        |                                                                                                                                                                                             |                         | Other: _____           |            |         |    |
|                                                        | If yes, what type of detergent, fabric softener, and/or dryer sheets are used (indicate "NA" if not used)?<br><br><i>If participant agreed earlier, take a photo. Name of photographer:</i> |                         | Detergent              |            |         |    |
|                                                        |                                                                                                                                                                                             |                         | Fabric Softener        |            |         |    |
|                                                        |                                                                                                                                                                                             |                         | Dryer Sheets           |            |         |    |
| If yes, how often is the dryer used?                   |                                                                                                                                                                                             | All loads of laundry    | Most loads of laundry  |            |         |    |
|                                                        |                                                                                                                                                                                             | Few loads of laundry    | Never                  | Don't Know |         |    |
| How often is dryer lint removed from the dryer filter? |                                                                                                                                                                                             | After every load        | After 2 – 5 loads      |            |         |    |
|                                                        |                                                                                                                                                                                             | After more than 5 loads | Never                  | Don't Know |         |    |
| How often and how do you clean the:                    | Living Room                                                                                                                                                                                 | Vacuum                  | Daily NA               | Weekly     | Monthly | DK |
|                                                        |                                                                                                                                                                                             |                         | Other (specify): _____ |            |         |    |
|                                                        |                                                                                                                                                                                             | Dust                    | Daily NA               | Weekly     | Monthly | DK |
|                                                        |                                                                                                                                                                                             |                         | Other (specify): _____ |            |         |    |
|                                                        | Sweep                                                                                                                                                                                       | Daily NA                | Weekly                 | Monthly    | DK      |    |
|                                                        |                                                                                                                                                                                             | Other (specify): _____  |                        |            |         |    |
|                                                        | Mop                                                                                                                                                                                         | Daily NA                | Weekly                 | Monthly    | DK      |    |
|                                                        |                                                                                                                                                                                             | Other (specify): _____  |                        |            |         |    |

|  |                |               |             |             |         |         |
|--|----------------|---------------|-------------|-------------|---------|---------|
|  |                | Wipe Surfaces | Daily<br>NA | Weekly      | Monthly | DK      |
|  | Kitchen        | Vacuum        | Daily<br>NA | Weekly      | Monthly | DK      |
|  |                | Dust          | Daily<br>NA | Weekly      | Monthly | DK      |
|  |                | Sweep         | Daily<br>NA | Weekly      | Monthly | DK      |
|  |                | Mop           | Daily<br>NA | Weekly      | Monthly | DK      |
|  |                | Wipe Surfaces | Daily<br>NA | Weekly      | Monthly | DK      |
|  |                |               | Vacuum      | Daily<br>NA | Weekly  | Monthly |
|  | Master Bedroom | Dust          | Daily<br>NA | Weekly      | Monthly | DK      |
|  |                | Sweep         | Daily<br>NA | Weekly      | Monthly | DK      |
|  |                | Mop           | Daily<br>NA | Weekly      | Monthly | DK      |
|  |                | Wipe Surfaces | Daily<br>NA | Weekly      | Monthly | DK      |
|  |                |               |             |             |         |         |

|                                                             |                        |                        |                        |         |         |    |  |
|-------------------------------------------------------------|------------------------|------------------------|------------------------|---------|---------|----|--|
|                                                             | Bathroom               | Vacuum                 | Daily<br>NA            | Weekly  | Monthly | DK |  |
|                                                             |                        |                        | Other (specify): _____ |         |         |    |  |
|                                                             |                        | Dust                   | Daily<br>NA            | Weekly  | Monthly | DK |  |
|                                                             |                        |                        | Other (specify): _____ |         |         |    |  |
|                                                             |                        | Sweep                  | Daily<br>NA            | Weekly  | Monthly | DK |  |
|                                                             |                        | Other (specify): _____ |                        |         |         |    |  |
|                                                             | Mop                    | Daily<br>NA            | Weekly                 | Monthly | DK      |    |  |
|                                                             |                        | Other (specify): _____ |                        |         |         |    |  |
|                                                             | Wipe Surfaces          | Daily<br>NA            | Weekly                 | Monthly | DK      |    |  |
|                                                             |                        | Other (specify): _____ |                        |         |         |    |  |
| Other Rooms:<br>_____                                       | Vacuum                 | Daily<br>NA            | Weekly                 | Monthly | DK      |    |  |
|                                                             |                        | Other (specify): _____ |                        |         |         |    |  |
|                                                             | Dust                   | Daily<br>NA            | Weekly                 | Monthly | DK      |    |  |
|                                                             |                        | Other (specify): _____ |                        |         |         |    |  |
|                                                             | Sweep                  | Daily<br>NA            | Weekly                 | Monthly | DK      |    |  |
|                                                             | Other (specify): _____ |                        |                        |         |         |    |  |
| Mop                                                         | Daily<br>NA            | Weekly                 | Monthly                | DK      |         |    |  |
|                                                             | Other (specify): _____ |                        |                        |         |         |    |  |
| Wipe Surfaces                                               | Daily<br>NA            | Weekly                 | Monthly                | DK      |         |    |  |
|                                                             | Other (specify): _____ |                        |                        |         |         |    |  |
| What types of cleaning agents do you use to clean each room | Living Room            |                        |                        |         |         |    |  |

|                                                                                                                                                                         |                                                               |                                                                                              |
|-------------------------------------------------------------------------------------------------------------------------------------------------------------------------|---------------------------------------------------------------|----------------------------------------------------------------------------------------------|
| (indicate "NA" if none used)?<br><br><i>If participant agreed earlier, take a photo.</i><br><u>Name of photographer:</u>                                                | Kitchen                                                       |                                                                                              |
|                                                                                                                                                                         | Bedroom(s)                                                    |                                                                                              |
|                                                                                                                                                                         | Bathroom                                                      |                                                                                              |
| Do you use any air purifiers such as HEPA filters, ozone generators, or ionizers?                                                                                       | Y    N    Don't Know                                          |                                                                                              |
|                                                                                                                                                                         | If yes, what type(s) and where?                               | HEPA filter      Ozone generator      Ionizer<br>Other: _____      Don't Know                |
| Are you aware of any mold or mildew in the home?                                                                                                                        | Y    N    Don't Know                                          |                                                                                              |
|                                                                                                                                                                         | If yes, where?                                                |                                                                                              |
| <b>6. Personal Care Products and Activities</b>                                                                                                                         |                                                               |                                                                                              |
| Does anyone in the home paint their nails?                                                                                                                              | Y    N    Don't Know                                          |                                                                                              |
|                                                                                                                                                                         | If yes, how often does someone in the home paint their nails? | Weekly    Monthly    Every few months<br>Annually    Don't Know                              |
|                                                                                                                                                                         | If yes, where are nails painted?                              | Living Room    Kitchen    Bedroom    Bathroom<br>Other: _____      Don't Know                |
| Does anyone in the home use hair spray?                                                                                                                                 | Y    N    Don't Know                                          |                                                                                              |
|                                                                                                                                                                         | If yes, how many people and with what frequency?              | No. of People:      Overall Frequency:<br>Daily    Weekly    Monthly<br>Rarely    Don't Know |
| Does anyone in the home use any hair straightening or hair curling products?<br><br><i>If participant agreed earlier, take a photo.</i><br><u>Name of photographer:</u> | Y    N    Don't Know                                          |                                                                                              |
|                                                                                                                                                                         | If yes, what type of product is used?                         |                                                                                              |
|                                                                                                                                                                         | If yes, how many people and with what frequency?              | No. of People:      Overall Frequency:<br>Daily    Weekly    Monthly<br>Rarely    Don't Know |
| What shampoo, conditioner, and/or                                                                                                                                       | Brand:                                                        | No. of People:      Overall Frequency:                                                       |

|                                                                                                                          |           |  |            |            |        |
|--------------------------------------------------------------------------------------------------------------------------|-----------|--|------------|------------|--------|
| other hair products are used?<br><br><i>If participant agreed earlier, take a photo.</i><br><u>Name of photographer:</u> | Shampoo 1 |  |            | Daily      | Weekly |
|                                                                                                                          |           |  |            | Monthly    | Rarely |
|                                                                                                                          |           |  |            | Don't Know | NA     |
|                                                                                                                          | Shampoo 2 |  |            | Daily      | Weekly |
|                                                                                                                          |           |  |            | Monthly    | Rarely |
|                                                                                                                          |           |  |            | Don't Know | NA     |
| Conditioner 1                                                                                                            |           |  | Daily      | Weekly     |        |
|                                                                                                                          |           |  | Monthly    | Rarely     |        |
|                                                                                                                          |           |  | Don't Know | NA         |        |
| Conditioner 2                                                                                                            |           |  | Daily      | Weekly     |        |
|                                                                                                                          |           |  | Monthly    | Rarely     |        |
|                                                                                                                          |           |  | Don't Know | NA         |        |
| Other:<br>_____<br>_____<br>_____                                                                                        |           |  | Daily      | Weekly     |        |
|                                                                                                                          |           |  | Monthly    | Rarely     |        |
|                                                                                                                          |           |  | Don't Know | NA         |        |
| Other:<br>_____<br>_____<br>_____                                                                                        |           |  | Daily      | Weekly     |        |
|                                                                                                                          |           |  | Monthly    | Rarely     |        |
|                                                                                                                          |           |  | Don't Know | NA         |        |

**7. General Household Activities**

|                                                               |                                                          |                                                   |                  |                  |
|---------------------------------------------------------------|----------------------------------------------------------|---------------------------------------------------|------------------|------------------|
| Are candles, incense, and/or air fresheners used in the home? | Y   N   Don't Know                                       |                                                   |                  |                  |
|                                                               | If yes, what type(s)?                                    | Candles   Incense   Air freshener<br>Other: _____ |                  |                  |
|                                                               | If yes, how frequently and which rooms are they used in? | Room:                                             | Frequency:       |                  |
|                                                               |                                                          | Living Room                                       | Daily            | Weekly   Monthly |
|                                                               |                                                          |                                                   | Rarely           | Don't know       |
|                                                               |                                                          | Kitchen                                           | Daily            | Weekly   Monthly |
|                                                               |                                                          |                                                   | Rarely           | Don't know       |
|                                                               |                                                          | Master Bedroom                                    | Daily            | Weekly   Monthly |
|                                                               |                                                          |                                                   | Rarely           | Don't know       |
|                                                               | Bathroom                                                 | Daily                                             | Weekly   Monthly |                  |
|                                                               | Rarely                                                   | Don't know                                        |                  |                  |
| Other:<br>_____                                               | Daily                                                    | Weekly   Monthly                                  |                  |                  |
|                                                               | Rarely                                                   | Don't know                                        |                  |                  |
| Other:<br>_____                                               | Daily                                                    | Weekly   Monthly                                  |                  |                  |
|                                                               | Rarely                                                   | Don't know                                        |                  |                  |

|                                                                                                                                           |                                                                                             |                                                     |                 |                       |                 |           |
|-------------------------------------------------------------------------------------------------------------------------------------------|---------------------------------------------------------------------------------------------|-----------------------------------------------------|-----------------|-----------------------|-----------------|-----------|
| Has anyone smoked in the house in the past year? This includes cigarettes, hookah, e-cigs, and others.                                    | Yes No Don't Know                                                                           |                                                     |                 |                       |                 |           |
|                                                                                                                                           | If yes, how often does smoking occur and when was the last time someone smoked in the home? | Daily<br>Rarely                                     | Weekly          | Monthly<br>Don't know |                 |           |
| Do you have any "crafting" activities that release "smelly" compounds such as painting, varnishing, wood working, and kids' crafts, etc.? | Painting Wood working Kids' Crafts Miniature Models<br>Other: _____ Don't know NA           |                                                     |                 |                       |                 |           |
|                                                                                                                                           | If applicable, when was the last time they were done?                                       | Activity:                                           | Last Done:      | Frequency:            | Location/Notes: |           |
|                                                                                                                                           |                                                                                             | Painting                                            |                 |                       |                 |           |
|                                                                                                                                           |                                                                                             | Wood working                                        |                 |                       |                 |           |
|                                                                                                                                           |                                                                                             | Kids' Crafts                                        |                 |                       |                 |           |
|                                                                                                                                           |                                                                                             | Miniature Models e.g., model airplanes, boats, etc. |                 |                       |                 |           |
|                                                                                                                                           |                                                                                             | Other: _____                                        |                 |                       |                 |           |
|                                                                                                                                           |                                                                                             | Other: _____                                        |                 |                       |                 |           |
| Are there any large electronic appliances in the house?<br><br>Examples: printers, computer monitors, TVs, desktop computer, etc...       | Yes No                                                                                      |                                                     |                 |                       |                 |           |
|                                                                                                                                           | If yes, what appliances are they?                                                           |                                                     |                 |                       |                 |           |
|                                                                                                                                           | How often are these appliances used?                                                        | Device:                                             | Frequency:      |                       |                 |           |
|                                                                                                                                           |                                                                                             | Printer                                             | Daily NA        | Weekly                | Monthly         | Rarely DK |
|                                                                                                                                           |                                                                                             | Monitor                                             | Daily NA        | Weekly                | Monthly         | Rarely DK |
|                                                                                                                                           |                                                                                             | Desktop PC                                          | Daily NA        | Weekly                | Monthly         | Rarely DK |
|                                                                                                                                           |                                                                                             | TV                                                  | Daily NA        | Weekly                | Monthly         | Rarely DK |
|                                                                                                                                           |                                                                                             |                                                     | Daily NA        | Weekly                | Monthly         | Rarely DK |
|                                                                                                                                           | Which of these appliances are located in sampling areas: living room, kitchen,              | Device:                                             | Location or NA: |                       |                 |           |
|                                                                                                                                           |                                                                                             | Printer                                             |                 |                       |                 |           |
| Monitor                                                                                                                                   |                                                                                             |                                                     |                 |                       |                 |           |
| Desktop PC                                                                                                                                |                                                                                             |                                                     |                 |                       |                 |           |
| TV                                                                                                                                        |                                                                                             |                                                     |                 |                       |                 |           |

|                                                                                                             |                                                                                                                                                             |                                                     |                                                     |  |
|-------------------------------------------------------------------------------------------------------------|-------------------------------------------------------------------------------------------------------------------------------------------------------------|-----------------------------------------------------|-----------------------------------------------------|--|
|                                                                                                             | bathroom,<br>bedroom?                                                                                                                                       |                                                     |                                                     |  |
| Have you or a professional used any pesticides, termiticides, or insecticides in the past year in the home? | Yes    No    Don't Know                                                                                                                                     |                                                     |                                                     |  |
|                                                                                                             | Professional      Personal                                                                                                                                  |                                                     |                                                     |  |
|                                                                                                             | If yes, what type and brand of pesticide/ insecticide was used?<br><br><i>If participant agreed earlier, take a photo.<br/><u>Name of photographer:</u></i> | Spray      Traps/Bait                               |                                                     |  |
|                                                                                                             |                                                                                                                                                             | Brand: _____                                        |                                                     |  |
|                                                                                                             | Where were insecticides/ pesticides used?                                                                                                                   | Indoors      Outdoors      Don't Know               |                                                     |  |
|                                                                                                             |                                                                                                                                                             | Location/Room: _____                                |                                                     |  |
|                                                                                                             | If traps/baits, what frequency are they replaced during the seasons?                                                                                        | Season:                                             | Frequency:                                          |  |
|                                                                                                             |                                                                                                                                                             | Winter                                              | Never   Monthly   Once/season<br>DK    Other: _____ |  |
|                                                                                                             |                                                                                                                                                             | Spring                                              | Never   Monthly   Once/season<br>DK    Other: _____ |  |
|                                                                                                             |                                                                                                                                                             | Summer                                              | Never   Monthly   Once/season<br>DK    Other: _____ |  |
| Fall                                                                                                        |                                                                                                                                                             | Never   Monthly   Once/season<br>DK    Other: _____ |                                                     |  |
| If a professional sprayed the home, when was the last occurrence?                                           | Before 2000      2000 – 2009      2010 – 2014<br>2015 – 2020      in 2021      Don't Know                                                                   |                                                     |                                                     |  |
| If the home was personally sprayed, when was the last occurrence and with what frequency?                   | Season                                                                                                                                                      | Frequency                                           |                                                     |  |
|                                                                                                             | Winter                                                                                                                                                      | Never   Monthly   Once/season<br>DK    Other: _____ |                                                     |  |
|                                                                                                             | Spring                                                                                                                                                      | Never   Monthly   Once/season<br>DK    Other: _____ |                                                     |  |
|                                                                                                             | Summer                                                                                                                                                      | Never   Monthly   Once/season<br>DK    Other: _____ |                                                     |  |

|                                                                                                                                                                                |                                                                           |      |                                              |
|--------------------------------------------------------------------------------------------------------------------------------------------------------------------------------|---------------------------------------------------------------------------|------|----------------------------------------------|
|                                                                                                                                                                                |                                                                           | Fall | Never Monthly Once/season<br>DK Other: _____ |
| Is there any water-resistant/repellant clothing/gear (e.g., tents, backpacks, boots, sporting goods, ski, ski wax, impregnating spray) in the home or attached garage?         | Yes No Don't Know                                                         |      |                                              |
|                                                                                                                                                                                | If yes, what clothing/gear, how many articles, and where are they stored? |      |                                              |
| <b>8. Cotton Clothing Item for Extraction</b>                                                                                                                                  |                                                                           |      |                                              |
| You were asked to identify one 100% cotton clothing item that you no longer need. Which type of clothing did you choose (e.g., t-shirt, shorts, pajamas, etc.)?                |                                                                           |      |                                              |
| When did you purchase it (estimate)?                                                                                                                                           |                                                                           |      |                                              |
| For how long has it been stored and how (estimate time since last laundry without wearing)?                                                                                    |                                                                           |      |                                              |
| Do you agree to leave the item stored where it is until we start sampling?                                                                                                     | Yes                                                                       | No   |                                              |
| Do you agree to give the item to us at the beginning of the sampling campaign for extraction for PFAS?                                                                         | Yes                                                                       | No   |                                              |
| <b>Please note any other activity involving products that may contain PFAS chemicals or that may have affected your indoor air quality in the home in the past seven days.</b> |                                                                           |      |                                              |

Figure S3: Home Survey, conducted before sampling started.



| 1. Demographic Data                                                                                      |                                                                    |       |        |         |       |            |
|----------------------------------------------------------------------------------------------------------|--------------------------------------------------------------------|-------|--------|---------|-------|------------|
| Has anyone moved into or out of the home since the beginning of the sampling campaign 6 to 9 months ago? | Y   N   Don't Know                                                 |       |        |         |       |            |
|                                                                                                          | If yes, please provide their age(s) and the date(s) they moved in. |       |        |         |       |            |
| Have there been any changes to the number and types of pets in the home?                                 | Y   N   NA                                                         |       |        |         |       |            |
|                                                                                                          | If yes, provide the details of the changes.                        |       |        |         |       |            |
| 2. Cooking Appliances and Habits                                                                         |                                                                    |       |        |         |       |            |
| Have any changes to the stove/exhaust fan in the home occurred?                                          | Y   N   Don't Know                                                 |       |        |         |       |            |
|                                                                                                          | If yes, what changes have occurred?                                |       |        |         |       |            |
| Have you purchased any new cookware since the sampling began?                                            | Y   N   Don't Know                                                 |       |        |         |       |            |
|                                                                                                          | If yes, what types, how many, and when did you purchase them?      |       |        |         |       |            |
| 3. Heating/Cooling Appliances and Habits                                                                 |                                                                    |       |        |         |       |            |
| Have you changed how you heat/cool/ventilate your home since the sampling began?                         | Y   N   Don't Know                                                 |       |        |         |       |            |
|                                                                                                          | If yes, please describe the changes and when they took place.      |       |        |         |       |            |
| Approximately how often per season do you have your window open for more than 15 minutes?                | <b>Winter</b>                                                      | Daily | Weekly | Monthly | Never | Don't Know |
|                                                                                                          | <b>Spring</b>                                                      | Daily | Weekly | Monthly | Never | Don't Know |
|                                                                                                          | <b>Summer</b>                                                      | Daily | Weekly | Monthly | Never | Don't Know |
|                                                                                                          | <b>Fall</b>                                                        | Daily | Weekly | Monthly | Never | Don't Know |
| 4. Home Characteristics                                                                                  |                                                                    |       |        |         |       |            |
| In the past 9 months, has there been a major renovation to                                               | Yes, when was the last one?                                        |       |        |         |       |            |

|                                                                                                                                                                                         |                                                                |                                                                                                   |               |
|-----------------------------------------------------------------------------------------------------------------------------------------------------------------------------------------|----------------------------------------------------------------|---------------------------------------------------------------------------------------------------|---------------|
| <p>this house or apartment, such as adding a room, putting up or taking down a wall, replacing windows, or refinishing floors?<br/>When was the last one?</p>                           | <p>Yes, don't know when      No Renovation      Don't Know</p> |                                                                                                   |               |
| <p>In the past year was the inside of this house or apartment painted? When was the last one? On how many rooms?</p>                                                                    |                                                                | Date:                                                                                             | No. of Rooms: |
|                                                                                                                                                                                         | Yes, it was painted on                                         |                                                                                                   |               |
|                                                                                                                                                                                         | Yes, it was painted but I don't know when                      |                                                                                                   |               |
|                                                                                                                                                                                         | <p>Not Painted      Don't Know</p>                             |                                                                                                   |               |
| <p>If yes, which room was painted and what was the approximate surface area (SA) painted?<br/><br/><i>*If participant doesn't know SA, ask if you can go to room to estimate it</i></p> |                                                                |                                                                                                   |               |
| <p>Were any carpets or rugs removed from the home since the start of the sampling campaign 6 to 9 months ago?</p>                                                                       | <p>Yes    No    Don't Know</p>                                 |                                                                                                   |               |
|                                                                                                                                                                                         | <p>If yes, how old was the carpet/rug that was removed?</p>    | <p>Before 2000      2000 – 2009      2010 – 2014<br/>2015 – 2020      in 2021      Don't Know</p> |               |
|                                                                                                                                                                                         | <p>When was the carpet or rug removed?</p>                     |                                                                                                   |               |
| <p>Has new carpeting or rugs been installed since the start of the sampling campaign, 6 to 9 months ago?</p>                                                                            |                                                                | Date:                                                                                             | No. of Rooms  |
|                                                                                                                                                                                         | Yes, it was carpeted on                                        |                                                                                                   |               |
|                                                                                                                                                                                         | Yes, it was installed but don't know when                      |                                                                                                   |               |
|                                                                                                                                                                                         | <p>No new carpets or rugs were installed      Don't Know</p>   |                                                                                                   |               |

|                                                                                                                                                          |                                     |                                                                                 |                 |                 |
|----------------------------------------------------------------------------------------------------------------------------------------------------------|-------------------------------------|---------------------------------------------------------------------------------|-----------------|-----------------|
| Since the start of the sampling campaign, 6 to 9 months ago, were rugs, drapes, or furniture professionally cleaned? Inside the house? When? What items? |                                     | Date:                                                                           | No. of Items    |                 |
|                                                                                                                                                          | Yes, cleaned on                     |                                                                                 |                 |                 |
|                                                                                                                                                          | Yes, but don't know when            |                                                                                 |                 |                 |
|                                                                                                                                                          | No professional cleaning            | Don't Know                                                                      |                 |                 |
| Has any non-carpet flooring been installed since the start of the sampling campaign, 6 to 9 months ago?                                                  | Yes      No      Don't Know         |                                                                                 |                 |                 |
|                                                                                                                                                          | If yes, what type?                  | Hardwood                                                                        | Vinyl           | Laminate        |
|                                                                                                                                                          |                                     | Linoleum                                                                        | Ceramic/tile    | Engineered wood |
|                                                                                                                                                          |                                     | Other: _____                                                                    |                 | Don't Know      |
|                                                                                                                                                          | When was it installed?              |                                                                                 |                 |                 |
|                                                                                                                                                          | Where was the flooring installed?   |                                                                                 |                 |                 |
| Approximately what size (area) of flooring was installed?                                                                                                | <100 sq ft                          | 100 – 200 sq ft                                                                 | 200 – 300 sq ft |                 |
|                                                                                                                                                          | >300 sq ft                          | Don't Know                                                                      |                 |                 |
| Has any furniture been treated with stain- or water-repellant chemical since the start of this sampling campaign, 6 to 9 months ago?                     | Y      N      Don't know            |                                                                                 |                 |                 |
|                                                                                                                                                          | If yes, when was it last treated?   |                                                                                 |                 |                 |
|                                                                                                                                                          | If yes, what room is it located in? |                                                                                 |                 |                 |
|                                                                                                                                                          | What product was used?              | Scotchgard    Rust-Oleum NeverWet<br>303 Fabric Guard<br>Other (specify): _____ |                 |                 |
| Has any furniture or large household                                                                                                                     | Yes      No      Don't Know         |                                                                                 |                 |                 |

|                                                                                                                                            |                                                                         |                                                           |
|--------------------------------------------------------------------------------------------------------------------------------------------|-------------------------------------------------------------------------|-----------------------------------------------------------|
| appliances been purchased and installed in the home since the start of the sampling campaign, 6 to 9 months ago?                           | If yes, when was the item brought into the home?                        |                                                           |
|                                                                                                                                            | If yes, where is this item located?                                     |                                                           |
|                                                                                                                                            | If yes, was this item treated with a water- or stain-repellant coating? | Yes    No    Don't Know                                   |
| Have you or a professional used any pesticides, termiticides, or insecticides since the start of the sampling campaign, 6 to 9 months ago? | Yes, professional                                                       | Yes, personal    No    Don't Know                         |
|                                                                                                                                            | If yes, when?                                                           |                                                           |
|                                                                                                                                            | If yes, what type and brand of pesticide/insecticide was used?          | Spray    Traps/Bait    Don't Know<br>Brand: _____         |
|                                                                                                                                            | If yes, where were pesticides/insecticides used?                        | Indoors    Outdoors    Don't know<br>Location/Room: _____ |
| <b>5. Cleaning Habits</b>                                                                                                                  |                                                                         |                                                           |
| Have any changes occurred to the washing machine/dryer since the beginning of the sampling campaign?                                       | Y    N    Don't Know                                                    |                                                           |
|                                                                                                                                            | If yes, please describe the changes                                     |                                                           |
| Have the types of laundry detergent, fabric softener, and/or dryer sheets changed since the beginning of the sampling campaign?            | Y    N    Don't Know                                                    |                                                           |
|                                                                                                                                            | If yes, please describe what changed                                    |                                                           |
| Have you changed the types of cleaning agents used to clean each room?                                                                     | Y    N    Don't Know                                                    |                                                           |
|                                                                                                                                            | If yes, please list the changes and which rooms they apply to           |                                                           |
| Have you purchased an air purifier such as HEPA filters, ozone generators, or ionizers since the beginning of the sampling                 | Y    N    Don't Know                                                    |                                                           |
|                                                                                                                                            | If yes, please list the type and where they're located                  |                                                           |

|                                                                                                                                                                                               |                                                                                                            |  |
|-----------------------------------------------------------------------------------------------------------------------------------------------------------------------------------------------|------------------------------------------------------------------------------------------------------------|--|
| campaign, 6- to 9-<br>months ago?                                                                                                                                                             |                                                                                                            |  |
| Have you become<br>aware of any<br>mold/mildew in the<br>home since the start<br>of the sampling<br>campaign, in the past<br>6 to 9 months?                                                   | Y   N   Don't Know                                                                                         |  |
|                                                                                                                                                                                               | If yes, where?                                                                                             |  |
| Have you done any<br>intensive, infrequent<br>cleaning (like "Spring<br>Cleaning") since the<br>start of the sampling<br>campaign, 6 to 9<br>months ago?                                      | Y   N   Don't Know                                                                                         |  |
|                                                                                                                                                                                               | If yes, where, when,<br>and with what<br>products?                                                         |  |
| <b>6. General Household Activities</b>                                                                                                                                                        |                                                                                                            |  |
| Have you hosted any<br>large gatherings since<br>the start of the<br>sampling campaign?                                                                                                       | Y   N   Don't Know                                                                                         |  |
|                                                                                                                                                                                               | If yes, please describe<br>each event. Number<br>of people, special<br>activities, duration,<br>when, etc. |  |
| Have you purchased<br>any water-<br>resistant/repellant<br>clothing/gear since the<br>start of the sampling<br>campaign?                                                                      | Y   N   Don't Know                                                                                         |  |
|                                                                                                                                                                                               | If yes, please describe<br>what and where they<br>are stored.                                              |  |
| Have you or anyone in<br>the home started a<br>new crafting hobby<br>that may impact<br>indoor air quality since<br>the start of the<br>sampling campaign, 6<br>to 9 months ago?              | Y   N   Don't Know                                                                                         |  |
|                                                                                                                                                                                               | If yes, please describe<br>the activity and when<br>it began                                               |  |
| Is there anything else<br>that you think might<br>be good for us to<br>know regarding<br>potential impacts on<br>your indoor air quality<br>and sources of PFAS<br>compounds in your<br>home? |                                                                                                            |  |

**Figure S4:** Home Exit Survey, administered at the end of the last sampling visit.

| Day/Date  | How often did someone use one of the following appliances?<br><br><i>*Please mark each use with an "x".</i> | For how long were the windows open?<br><br><i>*Please circle.</i>                                              | Was the heating and cooling (HAC) system or fan run?<br><br><i>*Please circle the HAC setting and the fan mode.</i>                          | Was the home ever unoccupied? At what times?<br><br><i>*If yes, please note the approx. time span. If no, please circle "No". Please also note the max. and min. number of people that occupied the home.</i>                                                                               | Did someone clean in the following room(s)?<br><br><i>*Please circle "V" for vacuum, "S" for swept, "D" for dusted, "W" for wiped surfaces, "M" for mopped, "CA" for cleaning agents, or "NA" if no cleaning occurred.</i>           | Did someone do laundry?<br><br><i>*Please mark with an "x" for each time the following laundry activities were done or circle "NA" if no laundry activity occurred.</i>                                                                                                                              |
|-----------|-------------------------------------------------------------------------------------------------------------|----------------------------------------------------------------------------------------------------------------|----------------------------------------------------------------------------------------------------------------------------------------------|---------------------------------------------------------------------------------------------------------------------------------------------------------------------------------------------------------------------------------------------------------------------------------------------|--------------------------------------------------------------------------------------------------------------------------------------------------------------------------------------------------------------------------------------|------------------------------------------------------------------------------------------------------------------------------------------------------------------------------------------------------------------------------------------------------------------------------------------------------|
| Day 1     | Stove:<br><br>Oven:<br><br>Microwave:<br><br>Toaster:<br><br>Water kettle:<br><br>NA                        | Never open<br><br>< 1 hr<br><br>1 – 3 hrs<br><br>3 – 6 hrs<br><br>6+ hrs<br><br>Open all day<br><br>Don't Know | <u>HAC setting:</u><br><br>Auto Heating<br><br>Cooling Off<br><br>Don't know<br><br><u>Fan setting:</u><br><br>Auto On Off<br><br>Don't know | Yes, at these times:<br><br><br><br><br><br><br><br><br><br><br>No Don't Know<br><br><br><br><br><br><br><br><br><br><br><u>Min. number of people in home:</u><br><br><br><br><br><br><br><br><br><br><br><u>Max. number of people in home:</u><br><br><br><br><br><br><br><br><br><br><br> | <u>Living Room:</u><br>V S D W<br>M CA NA<br><br><u>Kitchen:</u><br>V S D W<br>M CA NA<br><br><u>Bathroom:</u><br>V S D W<br>M CA NA<br><br><u>Bedroom:</u><br>V S D W<br>M CA NA<br><br><u>Other Room(s):</u><br>V S D W<br>M CA NA | Washing Machine:<br><br><br><br><br><br><br><br><br><br><br>Fabric Softener:<br><br><br><br><br><br><br><br><br><br><br>Dryer:<br><br><br><br><br><br><br><br><br><br><br>Dryer Sheets:<br><br><br><br><br><br><br><br><br><br><br>Dryer Lint Sampled:<br><br><br><br><br><br><br><br><br><br><br>NA |
| Comments: |                                                                                                             |                                                                                                                |                                                                                                                                              |                                                                                                                                                                                                                                                                                             |                                                                                                                                                                                                                                      |                                                                                                                                                                                                                                                                                                      |

Figure S5: Activity Checklist, one page for every day of each 6-day sampling period.

| Cooking Activity                                                                                                                                                                                           | Responses                                                                                 |                                 |                        |         |            |            |
|------------------------------------------------------------------------------------------------------------------------------------------------------------------------------------------------------------|-------------------------------------------------------------------------------------------|---------------------------------|------------------------|---------|------------|------------|
| What types of cookware did you and others use during the sampling week? (circle all used)                                                                                                                  | Teflon-coated Non-stick Pans                                                              |                                 | Other Non-stick Pans   |         |            |            |
|                                                                                                                                                                                                            | Other (stainless steel, cast iron, etc...):<br>_____                                      |                                 |                        |         |            |            |
| During the sampling week, how many times was microwaved popcorn made?                                                                                                                                      | None                                                                                      | 1 – 2                           | 3 – 6                  | 7+      | Don't Know |            |
| During the sampling week, how many times did you or others in the home make any ready-made frozen meals like pizza or microwaveable meals?                                                                 | Never                                                                                     | 1 – 6                           | 7 – 13                 | 14 – 20 | 21+        | Don't Know |
| Was the cooking activity in the home during the sampling week typical?<br><br>If no, please indicate what deviations occurred.                                                                             | Yes, typical<br><br>No, not typical – deviations:<br>_____<br><br>_____<br><br>Don't Know |                                 |                        |         |            |            |
| During the sampling week, how many times did you or someone in the house bring takeout food home?                                                                                                          | Never                                                                                     | 1 – 6                           | 7 – 13                 | 14 – 20 | 21+        | Don't Know |
| What types of food packaging did the food come in? (circle all that apply)                                                                                                                                 | Styrofoam                                                                                 | Paper Take-Out Boxes            | Compostable Containers |         |            |            |
|                                                                                                                                                                                                            | Foil Containers                                                                           | Plastic Container               | Pizza Box              |         |            |            |
|                                                                                                                                                                                                            | Other: _____                                                                              |                                 |                        |         | Don't Know |            |
| Cleaning Activity                                                                                                                                                                                          | Responses                                                                                 |                                 |                        |         |            |            |
| This question is about the cleaning products and types of cleaning you did during the sampling week. For each room, please tell me if you: vacuumed, dusted, mopped, swept, wiped surfaces, or cleaned the | <u>Living Room:</u><br><br>_____                                                          | Vacuum                          | Dust                   | Mop     | Sweep      |            |
|                                                                                                                                                                                                            |                                                                                           | Wipe Surfaces                   | Don't Know             |         | None       |            |
|                                                                                                                                                                                                            |                                                                                           | Cleaning Agents: _____<br>_____ |                        |         |            |            |

|                                                                                                                                                                                       |                                                                                                                   |                                                                                                                                                                                  |
|---------------------------------------------------------------------------------------------------------------------------------------------------------------------------------------|-------------------------------------------------------------------------------------------------------------------|----------------------------------------------------------------------------------------------------------------------------------------------------------------------------------|
| <p>oven as well as what cleaning agents you used.</p> <p><i>If participant agreed earlier, take a photo.</i></p> <p><i>Name of photographer:</i></p> <p>_____</p> <p>_____</p>        | <p><u>Kitchen:</u></p>                                                                                            | <p>Vacuum      Dust      Mop      Sweep</p> <p>Wipe Surfaces      Cleaning Oven      Don't Know</p> <p>None</p> <p>Cleaning Agents: -</p> <p>_____</p> <p>_____</p> <p>_____</p> |
|                                                                                                                                                                                       | <p><u>Bathroom:</u></p>                                                                                           | <p>Vacuum      Dust      Mop      Sweep</p> <p>Wipe Surfaces      Don't Know      None</p> <p>Cleaning Agents: -</p> <p>_____</p> <p>_____</p> <p>_____</p>                      |
|                                                                                                                                                                                       | <p><u>Master Bedroom:</u></p>                                                                                     | <p>Vacuum      Dust      Mop      Sweep</p> <p>Wipe Surfaces      Don't Know      None</p> <p>Cleaning Agents: -</p> <p>_____</p> <p>_____</p> <p>_____</p>                      |
|                                                                                                                                                                                       | <p><u>Other Room(s):</u></p> <p>_____</p> <p>-</p> <p>_____</p> <p>-</p>                                          | <p>Vacuum      Dust      Mop      Sweep</p> <p>Wipe Surfaces      Don't Know      None</p> <p>Cleaning Agents: -</p> <p>_____</p> <p>_____</p> <p>_____</p>                      |
| <p>Was the cleaning activity in the home during the sampling week typical?</p> <p>If no, please note what deviations (products, frequency, etc.) occurred and in which locations.</p> | <p>Yes, typical</p> <p>No, not typical – deviations:</p> <p>_____</p> <p>_____</p> <p>_____</p> <p>Don't Know</p> |                                                                                                                                                                                  |

**Figure S6:** Activity Survey, conducted at the end of each 6-day sampling period.



**Table S2:** Characteristics of homes participating in the IPA Campaign and associated indoor environmental conditions during the field sampling. The campaign started in July 2021 and ended in May 2022

| Home ID         | Duration of participation (months) | Start month-end month | Year built | Number of occupants | Number of pets | Home size (m <sup>2</sup> ) | Home volume, estimate (m <sup>3</sup> ) | Number of finished floors <sup>a</sup> | Flooring type in main living area <sup>b</sup> | Attached garage | Cloth sampling floor | Indoor T mean, range (°C) <sup>c</sup> | Indoor RH mean, range (%) <sup>c</sup> | Outdoor T mean, range, (°C) <sup>d</sup> | Outdoor RH mean, range, (%) <sup>d</sup> | Indoor CO <sub>2</sub> mean, range (ppm) <sup>e</sup> | ACH, estimate mean ± std. dev. (h <sup>-1</sup> ) <sup>f</sup> |
|-----------------|------------------------------------|-----------------------|------------|---------------------|----------------|-----------------------------|-----------------------------------------|----------------------------------------|------------------------------------------------|-----------------|----------------------|----------------------------------------|----------------------------------------|------------------------------------------|------------------------------------------|-------------------------------------------------------|----------------------------------------------------------------|
| 65              | 9.1                                | Jul - Apr             | 1987       | 3                   | 1              | 169.8                       | 411                                     | 2                                      | Hardwood, rugs                                 | y               | 2nd                  | 21.0, [15.1-27.0]                      | 53.2, [19.0-84.6]                      | 15.4, [-9.0-38.0]                        | 70.3, [14.3-100]                         | 504, [355-870]                                        | 0.25 ± 0.05                                                    |
| 18              | 9.2                                | Jul - Apr             | 1993       | 2                   | 3              | 242.5                       | 669                                     | 2                                      | Carpet, linoleum                               | y               | 2nd                  | 20.4, [13.7-25.6]                      | 49.5, [29.0-73.5]                      | 15.3, [-9.0-38.0]                        | 69.7, [14.3-100]                         | 624, [425-1704]                                       | 0.47 ± 0.31                                                    |
| 78              | 7.5                                | Jul - Mar             | 1945       | 2                   | 2              | 68.7                        | 162                                     | 1                                      | Vinyl, rugs                                    | n               | 1st                  | 20.5, [16.5-24.3]                      | 52.1, [29.6-82.5]                      | 15.1, [-9.0-38.0]                        | 71.3, [16.3-100]                         | 1086, [500-2311]                                      | 0.40 ± 0.25                                                    |
| 30              | 6.7                                | Jul - Feb             | 1962       | 2                   | 1              | 120.0                       | 295                                     | 1                                      | Hardwood, rugs                                 | n               | 1st                  | 21.6, [16.1-27.5]                      | 57.2, [23.1-86.4]                      | 15.2, [-9.0-38.0]                        | 71.9, [20.7-100]                         | 622, [378-971]                                        | 0.44 ± 0.05                                                    |
| 82 <sup>g</sup> | 1.0                                | Aug - Sep             | 2017       | 1                   | 1              | 152.5                       | 420                                     | 2                                      | Laminate, rugs                                 | y               | 2nd                  | 24.8, [21.3-26.7]                      | 56.6, [49.1-75.8]                      | 26.0, [12.0-38.0]                        | 77.9, [30.1-100]                         | 593, [481-815]                                        | 0.77 <sup>g</sup>                                              |
| 50              | 9.1                                | Aug - May             | 1954       | 2                   | 2              | 108.1                       | 268                                     | 1                                      | Hardwood, rugs                                 | n               | 1st                  | 20.7, [14.3-28.6]                      | 55, [31.4-82.0]                        | 14.5, [-9.0-38.0]                        | 68.5, [14.3-100]                         | 678, [426-2122]                                       | 0.38 ± 0.04                                                    |
| 43              | 8.9                                | Aug - May             | 1920       | 2                   | 1              | 117.1                       | 286                                     | 1                                      | Laminate, rugs                                 | n               | 1st                  | 21.7, [15.0-25.7]                      | 55, [22.7-82.0]                        | 14.1, [-9.0-36.0]                        | 68.3, [14.3-100]                         | 1025, [407-2552]                                      | 0.19 ± 0.06                                                    |
| 35              | 7.3                                | Aug - Mar             | 1920       | 2                   | 0              | 111.6                       | 269                                     | 1                                      | Laminate, rugs                                 | n               | 1st                  | 22.4, [10.7-31.7]                      | 47.5, [21.8-71.9]                      | 13.2, [-9.0-36.0]                        | 68.8, [14.3-100]                         | 746, [400-1595]                                       | 0.58 ± 0.25                                                    |
| 10              | 8.5                                | Sep - May             | 1985       | 2                   | 0              | 137.1                       | 332                                     | 2                                      | Bamboo, rugs                                   | y               | 2nd                  | 19.6, [10.8-27.0]                      | 55, [18.1-81.0]                        | 13.4, [-9.0-34.0]                        | 67.6, [14.3-100]                         | 667, [383-1840]                                       | 0.50 ± 0.15                                                    |
| 59              | 8.1                                | Sep - May             | 2002       | 4                   | 0              | 161.8                       | 440                                     | 2                                      | Hardwood, rugs                                 | n               | 2nd                  | 21.1, [9.6-27.5]                       | 53.1, [28.8-82.1]                      | 13.0, [-9.0-33.0]                        | 67.5, [14.3-100]                         | 1126, [698-2085]                                      | 0.24 ± 0.04                                                    |
| 01              | 6.7                                | Nov - May             | 1999       | 1                   | 2              | 174.1                       | 481                                     | 2                                      | Hardwood, rugs                                 | n               | 2nd                  | 21.2, [17.9-26.2]                      | 39.9, [20.8-67.7]                      | 11.6, [-9.0-36.0]                        | 64.5, [14.3-100]                         | 574, [419-1067]                                       | 0.21 ± 0.02                                                    |

<sup>a</sup> Excluding unfinished attics or basements  
<sup>b</sup> "Main living area" usually refers to the living room; for homes with open floor plans, the kitchen and/or dining areas were included as well  
<sup>c</sup> Temperature (T) and relative humidity (RH) data based on continuous measurements during field campaign  
<sup>d</sup> Based on KRDU weather station data  
<sup>e</sup> CO<sub>2</sub> data collected only during the 6-day sampling periods  
<sup>f</sup> Air exchange rate (ACH) calculation based on CO<sub>2</sub> data as described in Bekö et al.<sup>1</sup>  
<sup>g</sup> Home 82 withdrew from the study after one month

**Table S3:** Window opening behavior of participants during the 6-day sampling periods

| Home ID | Sampling period | Sampling month | Number of times a window was open for >15 minutes during the 6-day sampling period |
|---------|-----------------|----------------|------------------------------------------------------------------------------------|
| 65      | t = 0           | July           | 6                                                                                  |
|         | t = 3 months    | October        | 7                                                                                  |
|         | t = 6 months    | January        | 7                                                                                  |
| 18      | t = 0           | July           | 0                                                                                  |
|         | t = 3 months    | October        | 0                                                                                  |
|         | t = 6 months    | January        | 0                                                                                  |
| 78      | t = 0           | July           | 0                                                                                  |
|         | t = 3 months    | October        | 0                                                                                  |
|         | t = 6 months    | January        | 0                                                                                  |
| 30      | t = 0           | July           | 0                                                                                  |
|         | t = 3 months    | October        | 10                                                                                 |
|         | t = 6 months    | February       | 4                                                                                  |
| 82      | t = 0           | August         | 4                                                                                  |
|         | t = 3 months    | NA             | NA                                                                                 |
|         | t = 6 months    | NA             | NA                                                                                 |
| 50      | t = 0           | August         | 5                                                                                  |
|         | t = 3 months    | November       | 6                                                                                  |
|         | t = 6 months    | January        | 0                                                                                  |
| 43      | t = 0           | August         | 0                                                                                  |
|         | t = 3 months    | November       | 2                                                                                  |
|         | t = 6 months    | February       | 7                                                                                  |
| 35      | t = 0           | August         | 1                                                                                  |
|         | t = 3 months    | November       | 7                                                                                  |
|         | t = 6 months    | February       | 9                                                                                  |
| 10      | t = 0           | September      | 14                                                                                 |
|         | t = 3 months    | December       | 4                                                                                  |
|         | t = 6 months    | February       | 10                                                                                 |
| 59      | t = 0           | September      | 0                                                                                  |
|         | t = 3 months    | December       | 0                                                                                  |
|         | t = 6 months    | March          | 4                                                                                  |
| 01      | t = 0           | November       | 1                                                                                  |
|         | t = 3 months    | January        | 0                                                                                  |
|         | t = 6 months    | May            | 9                                                                                  |

**Table S4:** PFAS analytes and mass-labeled standards, including CAS RNs, short names, and vendors

|                                                          | <b>Full name</b>                                       | <b>CAS RN</b>                                | <b>Short name</b> | <b>Vendor</b>   | <b>Catalog #</b> | <b>Associated mass-labeled standard</b> |
|----------------------------------------------------------|--------------------------------------------------------|----------------------------------------------|-------------------|-----------------|------------------|-----------------------------------------|
| <b>Analytes</b>                                          | 2-(Perfluorohexyl)ethanol                              | 647-42-7                                     | 6:2 FTOH          | Sigma Aldrich   | 370533           | 13C-6:2 FTOH                            |
|                                                          | 2-(Perfluorooctyl)ethanol                              | 678-39-7                                     | 8:2 FTOH          | Sigma Aldrich   | 532789           | 13C-8:2 FTOH                            |
|                                                          | 2-(Perfluorodecyl)ethanol                              | 865-86-1                                     | 10:2 FTOH         | Wellington Labs | FDET             | 13C-10:2 FTOH                           |
|                                                          | 2-(Perfluorooctyl)ethyl acrylate                       | 27905-45-9                                   | 8:2 FTAC          | Wellington Labs | 8:2FTAc          | 13C-8:2 FTOH                            |
|                                                          | 2-(Perfluorodecyl)ethyl acrylate                       | 17741-60-5                                   | 10:2 FTAC         | Wellington Labs | 10:2FTAc         | 13C-10:2 FTOH                           |
|                                                          | N-Methylperfluorooctane sulfonamide                    | 31506-32-8                                   | MeFOSA            | Wellington Labs | N-MeFOSA-M       | d-MeFOSA*, d-EtFOSA                     |
|                                                          | N-Ethylperfluorooctane sulfonamide                     | 4151-50-2                                    | EtFOSA            | Wellington Labs | N-EtFOSA-M       | d-EtFOSA                                |
|                                                          | N-Methyl-N-(2-hydroxyethyl)perfluorooctane sulfonamide | 24448-09-7                                   | MeFOSE            | Wellington Labs | N-MeFOSE-M       | d7-MeFOSE                               |
|                                                          | N-Ethyl-N-(2-hydroxyethyl)perfluorooctane sulfonamide  | 1691-99-2                                    | EtFOSE            | Wellington Labs | N-EtFOSE-M       | d7-MeFOSE                               |
|                                                          | <b>Mass-labeled standards</b>                          | 2-Perfluorohexyl[1,1-2H2]-[1,2-13C2] ethanol | NA                | 13C-6:2 FTOH    | Wellington Labs  | MFHET                                   |
| 2-Perfluorooctyl-[1,1-2H2]-[1,2-13C2]-ethanol            |                                                        | NA                                           | 13C-8:2 FTOH      | Wellington Labs | MFOET            |                                         |
| 2-Perfluorodecyl[1,1-2H2]-[1,2-13C2]ethanol              |                                                        | NA                                           | 13C-10:2 FTOH     | Wellington Labs | MFDET            |                                         |
| N-methyl-d3-perfluoro-1-octanesulfanamide                |                                                        | NA                                           | d-MeFOSA          | Wellington Labs | d-N-MeFOSA-M     |                                         |
| N-ethyl-d5-perfluoro-1-octanesulfonamide                 |                                                        | NA                                           | d-EtFOSA          | Wellington Labs | d-N-EtFOSA-M     |                                         |
| 2-(N-methyl-d3-perfluoro-1-octanesulfonamido)ethan-d4-ol |                                                        | NA                                           | d7-MeFOSE         | Wellington Labs | d7-N-MeFOSE-M    |                                         |

**Table S5:** Physico-chemical properties of neutral PFAS included in this study. MW: Molecular weight

| Analyte          | MW<br>(g mol <sup>-1</sup> ) | Vapor pressure, $p^*$ (Pa)   |                                |                                 |                              |                         |            |           | Octanol-air partition coefficient, $K_{oa}$ |                                 |                               |                                 |                                 |                              |                                       |                         |            |           |
|------------------|------------------------------|------------------------------|--------------------------------|---------------------------------|------------------------------|-------------------------|------------|-----------|---------------------------------------------|---------------------------------|-------------------------------|---------------------------------|---------------------------------|------------------------------|---------------------------------------|-------------------------|------------|-----------|
|                  |                              | Lei et al. 2004 <sup>2</sup> | Stock et al. 2004 <sup>3</sup> | Shoeib et al. 2004 <sup>4</sup> | Kim et al. 2015 <sup>5</sup> | OPERA 2022 <sup>6</sup> | mean       | std. dev. | Lei et al. 2004 <sup>2</sup>                | Shoeib et al. 2004 <sup>4</sup> | Goss et al. 2006 <sup>7</sup> | Thuens et al. 2008 <sup>8</sup> | Dreyer et al. 2009 <sup>9</sup> | Kim et al. 2015 <sup>5</sup> | Salt-hammer et al. 2022 <sup>10</sup> | OPERA 2022 <sup>6</sup> | mean       | std. dev. |
| <b>6:2 FTOH</b>  | 364.1                        | 145                          | 713                            | NA                              | 38                           | 80                      | <b>244</b> | 273       | 3.6                                         | NA                              | 5.3                           | 4.8                             | NA                              | 5.4                          | NA                                    | 4.1                     | <b>4.6</b> | 0.70      |
| <b>8:2 FTOH</b>  | 464.1                        | 46                           | 254                            | NA                              | 13                           | 28                      | <b>85</b>  | 98        | 4.2                                         | NA                              | 5.6                           | 5.6                             | NA                              | 6.2                          | 4.9                                   | 4.2                     | <b>5.1</b> | 0.74      |
| <b>10:2 FTOH</b> | 564.1                        | 13                           | 144                            | NA                              | 4.9                          | 7.3                     | <b>42</b>  | 59        | 4.8                                         | NA                              | NA                            | 5.7                             | NA                              | 6.9                          | NA                                    | 4.8                     | <b>5.5</b> | 0.85      |
| <b>8:2 FTAC</b>  | 518.2                        | NA                           | NA                             | NA                              | NA                           | 20                      | <b>20</b>  | NA        | NA                                          | NA                              | NA                            | NA                              | 5.2                             | NA                           | NA                                    | 4.5                     | <b>4.9</b> | 0.34      |
| <b>10:2 FTAC</b> | 618.2                        | NA                           | NA                             | NA                              | NA                           | 14                      | <b>14</b>  | NA        | NA                                          | NA                              | NA                            | NA                              | 5.7                             | NA                           | NA                                    | 4.8                     | <b>5.2</b> | 0.48      |
| <b>MeFOSA</b>    | 513.2                        | NA                           | NA                             | NA                              | 10                           | 1.6E-02                 | <b>5.1</b> | 5.1       | NA                                          | NA                              | NA                            | NA                              | 6.3                             | 6.4                          | 6.2                                   | 4.6                     | <b>5.8</b> | 0.74      |
| <b>EtFOSA</b>    | 527.2                        | 2.4                          | NA                             | NA                              | 7.4                          | 6.7E-04                 | <b>3.3</b> | 3.1       | 5.9                                         | NA                              | NA                            | NA                              | 6.6                             | 6.6                          | NA                                    | 4.9                     | <b>6.0</b> | 0.68      |
| <b>MeFOSE</b>    | 557.2                        | 0.33                         | NA                             | 4.0E-04                         | 5.9                          | 1.3E-03                 | <b>1.6</b> | 2.5       | 7.1                                         | 7.7                             | NA                            | NA                              | 6.4                             | 6.7                          | NA                                    | 6.7                     | <b>6.9</b> | 0.44      |
| <b>EtFOSE</b>    | 571.3                        | 0.19                         | NA                             | 1.7E-03                         | 4.4                          | 1.2E-01                 | <b>1.2</b> | 1.8       | 6.8                                         | 7.78                            | NA                            | NA                              | 6.7                             | 6.9                          | 7.4                                   | 7.5                     | <b>7.2</b> | 0.40      |

**Table S6:** Air samples collected during the IPA Campaign

| Home ID      | Sampling period | Sampling month | Sample type collected <sup>a</sup> |                          |             |               |
|--------------|-----------------|----------------|------------------------------------|--------------------------|-------------|---------------|
|              |                 |                | Total air                          | Pre-filtered (gas phase) | Field blank | Break-through |
| 65           | t = 0           | July           | x                                  | x                        | x           |               |
|              | t = 3 months    | October        | x                                  | x                        |             | x             |
|              | t = 6 months    | January        |                                    | x                        |             |               |
| 18           | t = 0           | July           | x                                  | x                        | x           |               |
|              | t = 3 months    | October        | 2x                                 |                          |             |               |
|              | t = 6 months    | January        |                                    | x                        |             |               |
| 78           | t = 0           | July           | x                                  | x                        | x           |               |
|              | t = 3 months    | October        | x                                  | x                        |             |               |
|              | t = 6 months    | January        |                                    | x                        |             |               |
| 30           | t = 0           | July           | x                                  | x                        | x           |               |
|              | t = 3 months    | October        | x                                  | x                        |             |               |
|              | t = 6 months    | February       |                                    | x                        |             |               |
| 82           | t = 0           | August         | x                                  | x                        | x           |               |
|              | t = 3 months    | NA             | NA                                 | NA                       | NA          | NA            |
|              | t = 6 months    | NA             | NA                                 | NA                       | NA          | NA            |
| 50           | t = 0           | August         | x                                  | x                        | x           |               |
|              | t = 3 months    | November       | x                                  | x                        |             |               |
|              | t = 6 months    | January        |                                    | x                        |             |               |
| 43           | t = 0           | August         | x                                  | x                        | x           |               |
|              | t = 3 months    | November       | x                                  |                          |             | x             |
|              | t = 6 months    | February       |                                    | x                        |             |               |
| 35           | t = 0           | August         | x                                  | x                        |             |               |
|              | t = 3 months    | November       | 2x                                 |                          | x           |               |
|              | t = 6 months    | February       |                                    | x                        | x           | x             |
| 10           | t = 0           | September      | x                                  | x                        |             |               |
|              | t = 3 months    | December       | 2x                                 |                          | x           |               |
|              | t = 6 months    | February       |                                    | x                        | x           |               |
| 59           | t = 0           | September      | x                                  | x                        |             |               |
|              | t = 3 months    | December       | x                                  |                          | x           | x             |
|              | t = 6 months    | March          |                                    | x                        |             |               |
| 01           | t = 0           | November       | x                                  | x                        | x           |               |
|              | t = 3 months    | NA             | NA                                 | NA                       | NA          | NA            |
|              | t = 6 months    | May            | x                                  | x                        |             | x             |
| <b>Total</b> |                 |                | 21 (24 incl. duplicates)           | 25                       | 13          | 5             |

<sup>a</sup> x indicates each sample collected

## Section S1: Additional Air Sampling Details

The filter housing (Filter Cartridge Assembly, Supelco, Bellefonte, PA) was rinsed with de-ionized (DI) water and methanol before each use. Before and after sampling, PUF-XAD2-PUF cartridges were wrapped in pre-baked (550°C, 12 h) aluminum foil and kept in polypropylene (PP) zipper bags (Ziploc Freezer Bags Quart, San Diego, CA). Prior to use, pre-baked QFFs were kept individually in Petri dishes lined with baked aluminum foil, sealed in PP zipper bags and stored in a -20°C freezer. After sampling, QFFs were placed again in their aluminum-lined Petri dishes and sealed in zipper bags. All samples were stored at -80°C until analysis.

In total, 13 PUF-XAD2-PUF and 11 QFF field blanks were collected at each home to determine field detection limits (FDLs). On five occasions (different days at different homes), two PUF-XAD2-PUF cartridges were connected in series to assess breakthrough. On three occasions (different days at different homes), duplicate total air (PUF-XAD2-PUF, no filter) samples were collected to assess field measurement precision. **Tables S7-S13** provide quality control measures.

## Section S2: Additional Cloth Sampling Details

Per manufacturer information, the cotton cloth was bleached first, then softener was added and it was dried and compacted. The softener is a cationic softener and lubricant made with quaternary amines (i.e., salts of quaternary ammonium cations).<sup>11</sup> Quaternary amines have one or two long alkyl chains linked to an ammonium salt. However, the exact composition of the softener is proprietary and was not disclosed. Cationic softener molecules, including those made from quaternary amines, create a more hydrophobic surface around the fibers, because their cation ends are oriented towards the negatively charged fiber and the alkyl chains are positioned outward. Before sampling, cloth was cut to size (see below), laundered with a fragrance free, sensitive skin detergent (Free & Gentle Liquid Laundry Detergent, Tide, Cincinnati, OH) at a normal setting, and then hung outside for 3-4 months to equilibrate with ambient air, which typically has much lower PFAS concentrations than indoor air. Cloth strips were protected by a large tent with open sides to allow for permanent air movement. After the “outdoor cleaning” period, all cloth strips to be deployed concurrently in a single home (i.e., for sampling, blanks, duplicates) were wrapped together in baked aluminum foil, sealed in a PP zipper bag, and stored at -20°C until use.

Sampler A (**Figure S7A**) holds six clean cotton cloth strips (~28 cm x 3.8 cm) attached to a stainless-steel cloth hanger using a stainless-steel wire and small metal binder clips so that the strips could hang freely from the hanger and were not in contact with each other. Stainless-steel safety pins were used as weights and to prevent the strips from rolling up. An aluminum roof was attached to

each hanger to protect the strips from the deposition of large particles. Two hangers with a total of 12 suspended cloth strips were placed in the closet of the master bedroom in each home (exception: Home 78 had only one hanger with seven cloth strips). Two additional cloth strips per home were collected as “t = 0” samples during deployment of the hangers. Then, duplicate cloth strip samples were collected after 24 hours (t = 1), 6 days (t = 2), 1 month (t = 3), 3 months (t = 4), 6 months (t = 5), and at the end of each home’s participation in the field campaign (t = 6) (exception: Home 78). On 1-3 occasions per home, cloth strip field blanks were brought to the home when sampling occurred. Each collected strip was placed immediately in a labeled and weighed 50 mL PP centrifuge tube (Corning 430921, Corning, NY) after taking it from the hanger and removing the safety pins. The centrifuge tubes were then weighed again, placed in a PP zipper bag, and stored at -80°C until analysis.

Sampler B (**Figure S7B**) consists of 14 larger clean cotton pieces (~28 cm x 15 cm) that were folded once and then distributed between folded clothing items, generally in a dresser drawer located in the master bedroom of each home. In one home (Home 35) the dresser was in the closet rather than the bedroom. In a few instances (Homes 65, 43, and 59), dresser drawers were not available and the folded cloth pieces were instead distributed between folded clothing items stacked on shelves in the master bedroom closet. At t = 0, two cloth pieces were collected without placement between clothing. Subsequently, two cloth pieces (designated “A” and “B”) were collected after 24 hours (t = 1), 6 days (t = 2), 1 month (t = 3), 3 months (t = 4), 6 months (t = 5), and at the end of each home’s participation in the field campaign (t = 6). As with the cloth strips, cloth pieces wrapped in baked aluminum foil were brought to the homes during 1-3 sampling visits per home, then unwrapped at the home, exposed briefly (1-2 min) to the air, and sampled together with the actual cloth pieces to serve as field blanks. Each collected cloth piece was removed from the drawer/stack of clothing, wrapped individually in baked aluminum foil, placed in a PP zipper bag and stored at -80°C until analysis.

Additionally, at the beginning of the campaign, study participants were asked if they were willing to donate one piece of clothing made of 100% cotton that had been laundered and then stored in their home for at least three months without being worn. All participants agreed. These clothing items were collected either during the t = 0 or the t = 4 (3-months) sampling period, wrapped in baked aluminum foil, placed in a PP zipper bag, and stored at -80°C until analysis. The cotton clothing items selected by participants for extraction were mostly t-shirts (N = 9), as well as one pair of pajama pants and one cotton rag. Results are reported both as mass-based concentrations and area-based concentrations. Because the areal density and thickness of the fabrics varied greatly, the discussion of the results focuses on the mass-based data to provide a more direct way of comparison.

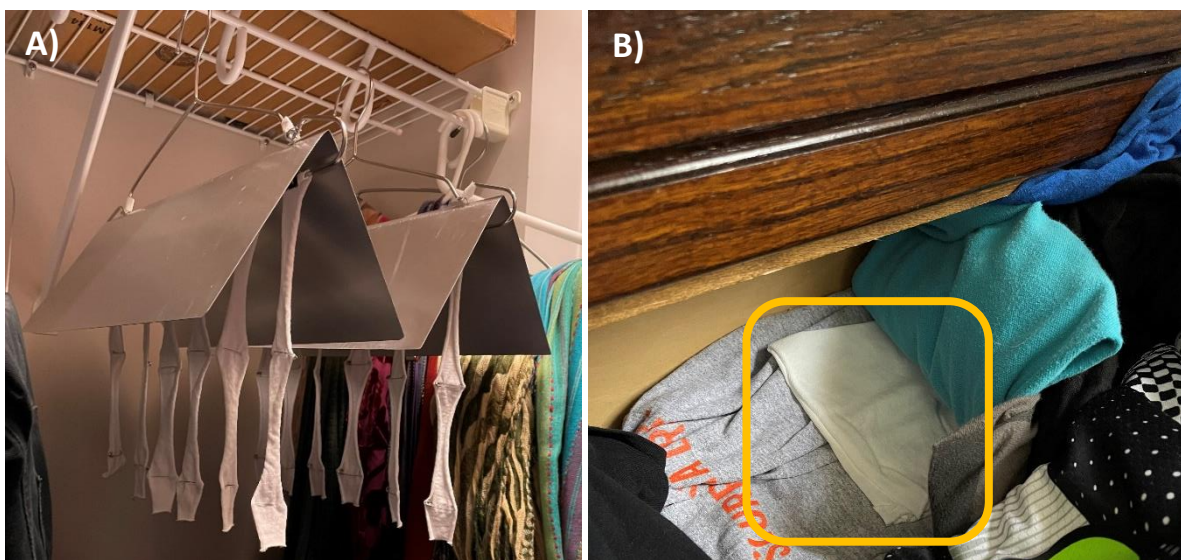

**Figure S7:** A) Cloth strips suspended on hangers (Sampler A) and B) a folded cloth piece placed in a dresser drawer (Sampler B) in a participant's home.

### Section S3: Additional Sample Processing and Analysis Details

The PUF plugs and XAD2 were carefully removed from the cartridge with a pair of clean tweezers and placed, together, in a PP jar (SCP Science DIGI TUBE 100 mL, Fisher Scientific, Waltham, MA). Two ~10 cm x 10 cm sections were cut from each clothing item for extraction. A single clothing section or cloth piece section (~7 cm x 15 cm) was each placed into a weighed 50 mL PP centrifuge tube for extraction. Cloth strips were extracted individually in their entirety in the 50 mL PP tubes in which they were placed during sampling. For PUF-XAD2-PUF samples (and blanks), extraction took place with 40 mL of the 3:1 (v/v) hexane/methanol solvent mixture, followed by 20 mL of the same solvent mixture, and each extract was poured into a separate 50 mL PP centrifuge tube (Corning 430921, Corning, NY), immediately reduced under a gentle stream of nitrogen to ~20 mL, and then combined. The hexane/methanol solvent mixture was used to expedite solvent evaporation in order to improve recoveries. To avoid interactions of hexane with the PP centrifuge tubes, samples were processed as quickly as possible. For cloth strips, cloth pieces and clothing sections, extraction took place with 20 mL of the solvent mixture, followed by 10 mL of the solvent mixture, with first and second extracts being combined immediately into a single 50 mL PP centrifuge tube.

For extract clean-up, ENVI-Carb (~50 mg; Supelclean™ ENVI-Carb™ SPE Bulk Packing, Supelco, Bellefonte, PA) was added to the extracts. For the PUF-XAD2-PUF extracts, the ENVI-Carb addition followed after the extracts were combined. After shaking for about 30 seconds, extracts were centrifuged (5 min, 5000 rpm). Extract volume was reduced with a gentle stream of nitrogen to ~5 mL and filtered with a nylon syringe filter (13 mm diameter, 0.22 μm pore size; VWR, Radnor, PA) into a 15 mL PP centrifuge tube (Corning CentriStar, Corning, NY). Evaporation continued to a final



volume of 1000  $\mu\text{L}$  (PUF-XAD2-PUF) or 300  $\mu\text{L}$  (cloth, clothing). A 200  $\mu\text{L}$  aliquot of the PUF-XAD2-PUF extract or the 300  $\mu\text{L}$  cloth/clothing extract was transferred into a PP autosampler vial (300  $\mu\text{L}$ , Thermo Scientific, Fisher Scientific, Pittsburgh, PA) for instrumental analysis. The final extracts volumes were chosen based on extensive method development to achieve reasonable recoveries as well as concentrations within the range of the calibration curve.

Samples were injected using pulsed splitless injection (injection volume 2  $\mu\text{L}$ ; pulse pressure 30 psi for 0.5 minutes; inlet temperature 250°C; 1.5  $\text{mL min}^{-1}$  flow rate; helium as carrier gas). The temperature program was as follows: The initial GC oven temperature is 60°C, which is held for 2 minutes, then the temperature is increased at a rate of 10°C  $\text{min}^{-1}$  to 200°C, and then further increased at a rate of 25°C  $\text{min}^{-1}$  to 240°C, which is held for 5 minutes. The MS source temperature will be set to 230°C and the MS quad temperature to 150°C. Quantifying and qualifying ions are listed in **Table S14**. Qualifying and quantifying ions for the analysis of neutral PFAS were selected because their abundances were strongest over the full range of calibration standard concentrations for the method and instrument used in this work and resulted from an extensive method development effort in advance of the sampling campaign. Optimal qualifying and quantifying ions may vary by instrument and method. Concentrations, statistics, and calculations using these values are reported in **Tables S16-S21**.

#### **Section S4: Quality assurance and quality control**

Average neutral PFAS extraction recoveries (**Table S7**) are highest for the air samples (74-108%) and lowest for the cotton clothing (30-66%); recoveries for suspended and folded cloth samples fall in between (43-74%). For air and cloth samples, recoveries of d7-MeFOSE are highest (108% and 66-74%, respectively) and 13C-6:2 FTOH are lowest (74% and 43-46%, respectively). Lower recoveries for the clothing samples likely occurred because some of the materials are thick and dyed, and extract evaporation took longer, allowing more time for loss of more volatile compounds. For five clothing samples, the recoveries of 13C-6:2 FTOH are below 30%. In these cases, 6:2 FTOH was not corrected for recoveries and the uncorrected concentrations are reported and flagged (see **Tables S20 and S21**).

Neutral PFAS field blank data are provided in **Table S8** and detection limits (**Table S9**) range from 0.03  $\text{ng m}^{-3}$  to 0.2  $\text{ng m}^{-3}$  for PUF-XAD2-PUF air samples and 0.001  $\text{ng cm}^{-2}$  to 0.1  $\text{ng cm}^{-2}$  for cloth and clothing samples, where the method detection limit (MDL) is given by the larger of the instrument detection limit (IDL) and the field-blank-based detection limit (FDL). The IDL is the mean concentration plus three times the standard deviation of repeat (N = 7) injections of the lowest calibration standard used (0.001  $\text{ng } \mu\text{L}^{-1}$ ). The FDL is the mean plus three standard deviations of the

field blank values for that type of sample. Because field blanks could not be collected for the cotton clothing, IDLs were used as MDLs. For PUF-XAD2-PUF air samples, selected species were observed in at least one field blank, specifically: 6:2 FTOH (detection frequency (DF)=23%), 8:2 FTOH (DF=15%), and EtFOSA (DF=15%). However, the FDL is only higher than the IDL for 6:2 FTOH, and therefore the IDL was used for all other compounds to calculate the MDL. Low levels of PFAS were also detected in some cloth strip and cloth piece field blanks, specifically: 6:2 FTOH (DF=67-69%), 8:2 FTOH (DF=15%), 10:2 FTOH (DF=7-15%), and EtFOSA (DF=30-38%). The two FOSEs were also detected in some cloth strip (DF =33-37%) and cloth piece (DF=92%) field blanks.

Breakthrough (N = 5) was modest for PUF-XAD2-PUF air samples, specifically: 18% ± 5% for 6:2 FTOH, <MDL - 16% for 8:2 FTOH, and <MDL to 13% for 10:2 FTOH (**Table S10**). FTOHs were detected in the downstream PUF-XAD2-PUF cartridges with a detection frequency of 100%, 60%, and 40% for 6:2 FTOH, 8:2 FTOH, and 10:2 FTOH, respectively. None of the other analytes were detected in the downstream PUF-XAD2-PUF cartridges. Results were not corrected for breakthrough.

Estimates of field measurement and analytical precision were obtained by analyzing paired collocated field samples (duplicates) and by conducting replicate analyses of the same extract. Pooled coefficients of variation ( $CV_{pooled}$ ) were calculated using the pooled standard deviation ( $s_{pooled}$ ) for paired samples:

$$s_{pooled} = \frac{\sqrt{\sum(x_1 - x_2)^2}}{2 \cdot N} \quad \text{Eq. 1}$$

where  $x_1$  and  $x_2$  are the data points (>MDL) of the duplicate pair and  $N$  is the number of duplicate pairs. The mean  $\bar{X}$  of all duplicate pairs is calculated as

$$\bar{X} = \frac{\sum(x_1 + x_2)}{2 \cdot N} \quad \text{Eq. 2}$$

And then  $CV_{pooled}$  is

$$CV_{pooled} = \frac{s_{pooled}}{\bar{X}} \cdot 100\% \quad \text{Eq. 3}$$

The three pairs of duplicate total-air samples showed good agreement with  $CV_{pooled}$  values of better 6% (**Table S11**). Duplicate samples (71 pairs) of the cloth strips showed good agreement for MeFOSE and EtFOSE, with  $CV_{pooled}$  values of 5% for both for the strips sampled at the same time from the same home (**Table S11**). The variation between cloth strip duplicates was larger for the FTOHs, with  $CV_{pooled}$  values ranging from 18% to 46%, indicating that for more volatile species, small changes in environmental conditions as well as in the proximity to sources may have a greater impact on their

partitioning behavior. Pooled CVs for duplicate cloth piece and household clothing items are in the range of 10%-16% and 41%-115%, respectively (**Table S11**).

Replicate analyses conducted on 18% of air sample extracts and 15% of cloth extracts over multiple analytical runs (**Table S12**) provided estimates of analytical precision (Eqn. 1-3).  $CV_{pooled}$  values were better than 9% for all air, cloth strip and cloth piece samples across compounds, with the exception of 6:2 FTOH in air samples and EtFOSE in cloth strips (23-26%) and EtFOSA in cloth pieces (65%).

While air samples were extracted and analyzed promptly (within 2 weeks of sampling), cloth samples were stored for up to 9 months before analysis. Therefore, positive controls were prepared, stored, and extracted with the last batch of cloth strip samples after 11.2 months of storage, to evaluate whether losses may have occurred during storage. Clean cloth strips (N = 3) were spiked 150 ng each of the nine analytes when the first cloth samples were collected and were stored the same way as the actual samples. On average, 94% of the spiked mass was recovered, with values ranging from 76% (10:2 FTAC) to 121% (10:2 FTOH) (**Table S13**).

**Table S7:** Extraction recoveries

|                      | Air samples |           |    | Cloth Strips (Sampler A) |           |     |
|----------------------|-------------|-----------|----|--------------------------|-----------|-----|
|                      | Average     | Std. Dev. | N  | Average                  | Std. Dev. | N   |
| <b>13C-6:2 FTOH</b>  | 74%         | 38%       | 85 | 46%                      | 13%       | 179 |
| <b>13C-8:2 FTOH</b>  | 75%         | 35%       | 85 | 47%                      | 18%       | 179 |
| <b>13C-10:2 FTOH</b> | 90%         | 16%       | 85 | 55%                      | 15%       | 179 |
| <b>d-EtFOSA</b>      | 82%         | 25%       | 85 | 68%                      | 28%       | 179 |
| <b>d-MeFOSA</b>      | 80%         | 42%       | 36 | 62%                      | 15%       | 76  |
| <b>d7-MeFOSE</b>     | 108%        | 25%       | 85 | 74%                      | 26%       | 179 |

|                      | Cloth Pieces (Sampler B) |           |     | Cotton Clothing |           |    |
|----------------------|--------------------------|-----------|-----|-----------------|-----------|----|
|                      | Average                  | Std. Dev. | N   | Average         | Std. Dev. | N  |
| <b>13C-6:2 FTOH</b>  | 43%                      | 9%        | 101 | 30%             | 18%       | 22 |
| <b>13C-8:2 FTOH</b>  | 49%                      | 11%       | 101 | 38%             | 21%       | 22 |
| <b>13C-10:2 FTOH</b> | 49%                      | 10%       | 101 | 41%             | 19%       | 22 |
| <b>d-EtFOSA</b>      | 56%                      | 12%       | 101 | 40%             | 14%       | 18 |
| <b>d-MeFOSA</b>      | 59%                      | 15%       | 101 | 66%             | 28%       | 22 |
| <b>d7-MeFOSE</b>     | 66%                      | 15%       | 101 | 48%             | 26%       | 22 |

**Table S8:** Neutral PFAS in air and cloth sample field blanks. “nd” = not detected. “FDL” = field detection limit, calculated as the field blank mean plus three times the standard deviation. For calculation of means and standard deviations, nd was replaced by 0

| <b>Air Sample Field Blank Concentrations (ng m<sup>-3</sup>, N = 13) assuming 21 m<sup>3</sup> of nominal sample volume</b> |                |                 |                 |                  |                 |                  |               |               |               |               |
|-----------------------------------------------------------------------------------------------------------------------------|----------------|-----------------|-----------------|------------------|-----------------|------------------|---------------|---------------|---------------|---------------|
| <b>Time of sampling</b>                                                                                                     | <b>Home ID</b> | <b>6:2 FTOH</b> | <b>8:2 FTOH</b> | <b>10:2 FTOH</b> | <b>8:2 FTAC</b> | <b>10:2 FTAC</b> | <b>EtFOSA</b> | <b>MeFOSA</b> | <b>MeFOSE</b> | <b>EtFOSE</b> |
| t = 0                                                                                                                       | 65             | nd              | 0.01            | nd               | nd              | nd               | nd            | nd            | nd            | nd            |
| t = 0                                                                                                                       | 18             | nd              | 0.04            | nd               | nd              | nd               | nd            | nd            | nd            | nd            |
| t = 0                                                                                                                       | 78             | nd              | nd              | nd               | nd              | nd               | nd            | nd            | nd            | nd            |
| t = 0                                                                                                                       | 30             | nd              | nd              | nd               | nd              | nd               | nd            | nd            | nd            | nd            |
| t = 0                                                                                                                       | 82             | nd              | nd              | nd               | nd              | nd               | nd            | nd            | nd            | nd            |
| t = 0                                                                                                                       | 50             | nd              | nd              | nd               | nd              | nd               | nd            | nd            | nd            | nd            |
| t = 0                                                                                                                       | 43             | nd              | nd              | nd               | nd              | nd               | nd            | nd            | nd            | nd            |
| t = 0                                                                                                                       | 01             | nd              | nd              | nd               | nd              | nd               | nd            | nd            | nd            | nd            |
| t = 3 months                                                                                                                | 35             | 0.02            | nd              | nd               | nd              | nd               | nd            | nd            | nd            | nd            |
| t = 3 months                                                                                                                | 10             | nd              | nd              | nd               | nd              | nd               | nd            | nd            | nd            | nd            |
| t = 3 months                                                                                                                | 59             | nd              | nd              | nd               | nd              | nd               | nd            | nd            | nd            | nd            |
| t = 6 months                                                                                                                | 35             | 0.21            | nd              | nd               | nd              | nd               | 0.03          | nd            | nd            | nd            |
| t = 6 months                                                                                                                | 10             | 0.09            | nd              | nd               | nd              | nd               | 0.03          | nd            | nd            | nd            |
| <b>mean (all samples)</b>                                                                                                   |                | 0.02            | 0.00            | 0.00             | 0.00            | 0.00             | 0.00          | 0.00          | 0.00          | 0.00          |
| <b>std dev (all samples)</b>                                                                                                |                | 0.06            | 0.01            | 0.00             | 0.00            | 0.00             | 0.01          | 0.00          | 0.00          | 0.00          |
| <b>min (all samples)</b>                                                                                                    |                | nd              | nd              | nd               | nd              | nd               | nd            | nd            | nd            | nd            |
| <b>max (all samples)</b>                                                                                                    |                | 0.21            | 0.04            | nd               | nd              | nd               | 0.03          | nd            | nd            | nd            |
| <b># detect</b>                                                                                                             |                | 3               | 2               | 0                | 0               | 0                | 2             | 0             | 0             | 0             |
| <b>% detect</b>                                                                                                             |                | 23%             | 15%             | 0%               | 0%              | 0%               | 15%           | 0%            | 0%            | 0%            |
| <b>Calculated FDL</b>                                                                                                       |                | 0.20            | 0.03            | 0.00             | 0.00            | 0.00             | 0.04          | 0.00          | 0.00          | 0.00          |

| <b>Cloth Strip Field Blank Concentrations (ng cm<sup>-2</sup>, N = 27)</b> |                |                 |                 |                  |                 |                  |               |               |               |               |
|----------------------------------------------------------------------------|----------------|-----------------|-----------------|------------------|-----------------|------------------|---------------|---------------|---------------|---------------|
| <b>Time of sampling</b>                                                    | <b>Home ID</b> | <b>6:2 FTOH</b> | <b>8:2 FTOH</b> | <b>10:2 FTOH</b> | <b>8:2 FTAC</b> | <b>10:2 FTAC</b> | <b>EtFOSA</b> | <b>MeFOSA</b> | <b>MeFOSE</b> | <b>EtFOSE</b> |
| t = 0                                                                      | 65             | 0.002           | nd              | nd               | nd              | nd               | nd            | nd            | nd            | nd            |
| t = 0                                                                      | 65             | nd              | nd              | nd               | nd              | nd               | nd            | nd            | nd            | nd            |
| t = 91 days                                                                | 65             | 0.009           | nd              | nd               | nd              | nd               | nd            | nd            | nd            | nd            |
| t = 273 days                                                               | 65             | 0.031           | nd              | nd               | nd              | nd               | nd            | nd            | nd            | nd            |
| t = 0                                                                      | 18             | nd              | nd              | nd               | nd              | nd               | nd            | nd            | <b>0.025</b>  | <b>0.020</b>  |
| t = 91 days                                                                | 18             | 0.011           | nd              | nd               | nd              | nd               | nd            | nd            | nd            | nd            |
| t = 0                                                                      | 78             | nd              | nd              | nd               | nd              | nd               | nd            | nd            | <b>0.023</b>  | <b>0.018</b>  |
| t = 31 days                                                                | 78             | nd              | nd              | nd               | nd              | nd               | nd            | nd            | nd            | nd            |
| t = 228 days                                                               | 78             | 0.019           | nd              | nd               | nd              | nd               | 0.003         | nd            | nd            | nd            |

|                              |    |       |              |              |       |       |       |       |       |       |
|------------------------------|----|-------|--------------|--------------|-------|-------|-------|-------|-------|-------|
| t = 0                        | 30 | 0.029 | nd           | nd           | nd    | nd    | 0.002 | nd    | 0.002 | 0.002 |
| t = 91 days                  | 30 | 0.014 | nd           | nd           | nd    | nd    | nd    | nd    | nd    | nd    |
| t = 202 days                 | 30 | 0.056 | nd           | nd           | nd    | nd    | nd    | nd    | nd    | nd    |
| t = 0                        | 50 | 0.022 | <b>0.019</b> | <b>0.014</b> | nd    | nd    | 0.001 | nd    | 0.001 | 0.001 |
| t = 31 days                  | 50 | 0.022 | nd           | nd           | nd    | nd    | nd    | nd    | nd    | nd    |
| t = 0                        | 43 | 0.000 | 0.009        | nd           | nd    | nd    | nd    | nd    | nd    | nd    |
| t = 31 days                  | 43 | 0.037 | nd           | nd           | nd    | nd    | nd    | nd    | nd    | nd    |
| t = 0                        | 35 | nd    | 0.006        | nd           | nd    | nd    | nd    | nd    | nd    | nd    |
| t = 31 days                  | 35 | 0.039 | nd           | nd           | nd    | nd    | nd    | nd    | nd    | nd    |
| t = 0                        | 10 | nd    | nd           | nd           | nd    | nd    | 0.002 | nd    | 0.002 | 0.002 |
| t = 91 days                  | 10 | 0.008 | nd           | nd           | nd    | nd    | nd    | nd    | nd    | nd    |
| t = 254 days                 | 10 | 0.020 | nd           | nd           | nd    | nd    | 0.002 | nd    | 0.002 | 0.002 |
| t = 0                        | 59 | 0.003 | nd           | nd           | nd    | nd    | nd    | nd    | nd    | nd    |
| t = 91 days                  | 59 | nd    | nd           | nd           | nd    | nd    | nd    | nd    | 0.001 | nd    |
| t = 0                        | 01 | 0.001 | nd           | nd           | nd    | nd    | nd    | nd    | nd    | nd    |
| t = 84 days                  | 01 | 0.028 | <b>0.020</b> | <b>0.015</b> | nd    | nd    | 0.001 | nd    | 0.002 | 0.002 |
| t = 175 days                 | 01 | nd    | nd           | nd           | nd    | nd    | 0.002 | nd    | 0.002 | 0.002 |
| t = 0                        | 82 | 0.018 | nd           | nd           | nd    | nd    | 0.003 | nd    | 0.002 | 0.002 |
| <b>mean (all samples)</b>    |    | 0.014 | 0.002        | 0.001        | 0.000 | 0.000 | 0.001 | 0.000 | nd    | 0.002 |
| <b>std dev (all samples)</b> |    | 0.015 | 0.005        | 0.004        | 0.000 | 0.000 | 0.001 | 0.000 | 0.006 | 0.005 |
| <b>min (all samples)</b>     |    | nd    | nd           | nd           | nd    | nd    | nd    | nd    | nd    | nd    |
| <b>max (all samples)</b>     |    | 0.056 | 0.020        | 0.015        | nd    | nd    | 0.003 | nd    | nd    | 0.020 |
| <b># detect</b>              |    | 18    | 4            | 2            | 0     | 0     | 8     | 0     | 10    | 9     |
| <b>% detect</b>              |    | 67%   | 15%          | 7%           | 0%    | 0%    | 30%   | 0%    | 37%   | 33%   |
| <b>Calculated FDL</b>        |    | 0.059 | 0.018        | 0.012        | 0.000 | 0.000 | 0.004 | 0.000 | 0.021 | 0.017 |

| <b>Cloth Piece Field Blank Concentrations (ng cm<sup>-2</sup>, N = 13)</b> |                |                 |                 |                  |                 |                  |               |               |               |               |
|----------------------------------------------------------------------------|----------------|-----------------|-----------------|------------------|-----------------|------------------|---------------|---------------|---------------|---------------|
| <b>Time of sampling</b>                                                    | <b>Home ID</b> | <b>6:2 FTOH</b> | <b>8:2 FTOH</b> | <b>10:2 FTOH</b> | <b>8:2 FTAC</b> | <b>10:2 FTAC</b> | <b>EtFOSA</b> | <b>MeFOSA</b> | <b>MeFOSE</b> | <b>EtFOSE</b> |
| t = 0                                                                      | 82             | nd              | nd              | nd               | nd              | nd               | nd            | nd            | 0.003         | 0.002         |
| t = 0                                                                      | 78             | 0.085           | nd              | nd               | nd              | nd               | nd            | nd            | nd            | nd            |
| t = 0                                                                      | 18             | 0.052           | nd              | nd               | nd              | nd               | nd            | nd            | 0.014         | 0.001         |
| t = 273 days                                                               | 65             | 0.041           | nd              | nd               | nd              | nd               | nd            | nd            | 0.001         | 0.001         |
| t = 0                                                                      | 10             | 0.077           | 0.006           | 0.010            | nd              | nd               | nd            | nd            | 0.001         | 0.001         |
| t = 202 days                                                               | 30             | 0.045           | 0.008           | 0.015            | nd              | nd               | nd            | nd            | 0.001         | 0.001         |
| t = 0                                                                      | 65             | nd              | nd              | nd               | nd              | nd               | nd            | nd            | nd            | nd            |
| t = 0                                                                      | 30             | nd              | nd              | nd               | nd              | nd               | nd            | nd            | nd            | nd            |
| t = 0                                                                      | 50             | 0.020           | nd              | nd               | nd              | nd               | nd            | nd            | nd            | nd            |

|                              |    |       |       |       |       |       |       |       |       |       |
|------------------------------|----|-------|-------|-------|-------|-------|-------|-------|-------|-------|
| t = 0                        | 43 | 0.014 | nd    |
| t = 0                        | 35 | 0.017 | nd    | nd    | nd    | nd    | 0.001 | nd    | nd    | nd    |
| t = 0                        | 59 | 0.017 | nd    |
| t = 0                        | 01 | nd    | nd    | nd    | nd    | nd    | 0.001 | nd    | 0.001 | 0.001 |
| <b>mean (all samples)</b>    |    | 0.028 | 0.001 | 0.002 | 0.000 | 0.000 | 0.000 | 0.000 | 0.002 | 0.001 |
| <b>std dev (all samples)</b> |    | 0.028 | 0.002 | 0.005 | 0.000 | 0.000 | 0.000 | 0.000 | 0.003 | 0.001 |
| <b>min (all samples)</b>     |    | nd    |
| <b>max (all samples)</b>     |    | 0.085 | 0.008 | 0.015 | nd    | nd    | 0.001 | nd    | 0.014 | 0.002 |
| <b># detect</b>              |    | 9     | 2     | 2     | 0     | 0     | 5     | 0     | 12    | 12    |
| <b>% detect</b>              |    | 69%   | 15%   | 15%   | 0%    | 0%    | 38%   | 0%    | 92%   | 92%   |
| <b>Calculated FDL</b>        |    | 0.112 | 0.008 | 0.016 | 0.000 | 0.000 | 0.001 | 0.000 | 0.012 | 0.003 |

**Table S9:** Instrument Detection Limits (IDLs) and Method Detection Limits (MDLs). The MDL is given by the larger of the IDL and the Field blank-based Detection Limit (FDL). The IDL is the mean concentration plus three times the standard deviation for repeated injections of the lowest calibration standard used (0.001 ng  $\mu\text{L}^{-1}$ ). The FDL is the mean plus three standard deviations of the field blanks for that sample type. Because field blanks could not be collected for the cotton clothing, only the IDLs were used to calculate MDLs. In the table, *italic* printed values are based on the IDL and underlined values are based on the FDL

| Analyte          | IDLs  |                          | MDLs                 |                                        |                                           |                                            |                                         |                                        |
|------------------|-------|--------------------------|----------------------|----------------------------------------|-------------------------------------------|--------------------------------------------|-----------------------------------------|----------------------------------------|
|                  | (ng)  | (ng $\mu\text{L}^{-1}$ ) | air samples<br>(ng)* | air samples<br>(ng $\text{m}^{-3}$ )** | cloth strips<br>(ng $\text{cm}^{-2}$ )*** | cloth pieces<br>(ng $\text{cm}^{-2}$ )**** | clothing<br>(ng $\text{cm}^{-2}$ )***** | clothing<br>(ng $\text{g}^{-1}$ )***** |
| <b>6:2 FTOH</b>  | 0.003 | 0.0016                   | <u>4.1</u>           | <u>0.20</u>                            | <u>0.059</u>                              | <u>0.11</u>                                | <i>0.003</i>                            | <i>0.36</i>                            |
| <b>8:2 FTOH</b>  | 0.004 | 0.0021                   | <i>2.1</i>           | <i>0.10</i>                            | <u>0.018</u>                              | <u>0.008</u>                               | <i>0.005</i>                            | <i>0.47</i>                            |
| <b>10:2 FTOH</b> | 0.005 | 0.0024                   | <i>2.4</i>           | <i>0.11</i>                            | <u>0.012</u>                              | <u>0.016</u>                               | <i>0.005</i>                            | <i>0.53</i>                            |
| <b>8:2 FTAC</b>  | 0.004 | 0.0019                   | <i>1.9</i>           | <i>0.09</i>                            | <i>0.006</i>                              | <i>0.005</i>                               | <i>0.004</i>                            | <i>0.42</i>                            |
| <b>10:2 FTAC</b> | 0.004 | 0.0022                   | <i>2.2</i>           | <i>0.10</i>                            | <i>0.006</i>                              | <i>0.006</i>                               | <i>0.005</i>                            | <i>0.47</i>                            |
| <b>EtFOSA</b>    | 0.005 | 0.0025                   | <i>2.5</i>           | <i>0.12</i>                            | <i>0.007</i>                              | <i>0.007</i>                               | <i>0.005</i>                            | <i>0.54</i>                            |
| <b>MeFOSA</b>    | 0.005 | 0.0027                   | <i>2.7</i>           | <i>0.13</i>                            | <i>0.008</i>                              | <i>0.007</i>                               | <i>0.006</i>                            | <i>0.58</i>                            |
| <b>MeFOSE</b>    | 0.001 | 0.00061                  | <i>0.61</i>          | <i>0.03</i>                            | <u>0.021</u>                              | <u>0.012</u>                               | <i>0.001</i>                            | <i>0.13</i>                            |
| <b>EtFOSE</b>    | 0.001 | 0.00058                  | <i>0.58</i>          | <i>0.03</i>                            | <u>0.017</u>                              | <u>0.003</u>                               | <i>0.001</i>                            | <i>0.13</i>                            |

*italic* printed values are based on the IDL, underlined values are based on the FDL  
\* for 1000  $\mu\text{L}$  of extract  
\*\* for 21  $\text{m}^3$  of air sample  
\*\*\* for 300  $\mu\text{L}$  of extract, normalized by an average cloth strip area of 103.6  $\text{cm}^2$   
\*\*\*\* for 300  $\mu\text{L}$  of extract, normalized by an average cloth piece area of 109.4  $\text{cm}^2$   
\*\*\*\*\* for 300  $\mu\text{L}$  of extract, normalized by an average cloth piece area of 141.8  $\text{cm}^2$  or average cloth weight of 2.73 g

**Table S10:** Breakthrough tests during air sampling (N = 5). “nd” = not detected. Results >MDL are printed in bold. For calculation of means and standard deviations, nd was replaced by 0. For breakthrough, “NA” indicates that analyte was not found in either the downstream not the upstream cartridge, while “0%” indicates that analyte was detected in the upstream cartridge, but not in the downstream cartridge.

| Time of sampling             | Home ID | Concentrations (ng m <sup>-3</sup> ) measured in downstream cartridge |             |             |           |           |                |           |                |                |
|------------------------------|---------|-----------------------------------------------------------------------|-------------|-------------|-----------|-----------|----------------|-----------|----------------|----------------|
|                              |         | 6:2 FTOH                                                              | 8:2 FTOH    | 10:2 FTOH   | 8:2 FTAC  | 10:2 FTAC | EtFOSA         | Me-FOSA   | Me-FOSE        | EtFOSE         |
| t = 3 months                 | 65      | <b>2.84</b>                                                           | nd          | nd          | nd        | nd        | nd             | nd        | nd             | nd             |
| t = 3 months                 | 43      | <b>3.52</b>                                                           | <b>0.13</b> | <b>0.15</b> | nd        | nd        | nd             | nd        | nd             | nd             |
| t = 3 months                 | 59      | <b>0.21</b>                                                           | nd          | nd          | nd        | nd        | nd             | nd        | nd             | nd             |
| t = 6 months                 | 35      | <b>1.49</b>                                                           | <b>0.70</b> | nd          | nd        | nd        | nd             | nd        | nd             | nd             |
| t = 6 months                 | 01      | <b>1.98</b>                                                           | <b>0.74</b> | <b>0.30</b> | nd        | nd        | nd             | nd        | nd             | nd             |
| <b>MDL</b>                   |         | 0.20                                                                  | 0.10        | 0.11        | 0.09      | 0.10      | 0.12           | 0.13      | 0.03           | 0.03           |
| <b>mean (all samples)</b>    |         | 2.01                                                                  | 0.32        | 0.09        | 0.00      | 0.00      | 0.00           | 0.00      | 0.00           | 0.00           |
| <b>std dev (all samples)</b> |         | 1.14                                                                  | 0.34        | 0.12        | 0.00      | 0.00      | 0.00           | 0.00      | 0.00           | 0.00           |
| <b>min (all samples)</b>     |         | 0.21                                                                  | 0.00        | 0.00        | 0.00      | 0.00      | 0.00           | 0.00      | 0.00           | 0.00           |
| <b>max (all samples)</b>     |         | 3.52                                                                  | 0.74        | 0.30        | 0.00      | 0.00      | 0.00           | 0.00      | 0.00           | 0.00           |
| <b># total</b>               |         | 5                                                                     | 5           | 5           | 5         | 5         | 5              | 5         | 5              | 5              |
| <b># detect &gt;MDL</b>      |         | 5                                                                     | 3           | 2           | 0         | 0         | 0              | 0         | 0              | 0              |
| <b>% detect &gt;MDL</b>      |         | 100%                                                                  | 60%         | 40%         | 0%        | 0%        | 0%             | 0%        | 0%             | 0%             |
| <b>Breakthrough</b>          | 65      | 21%                                                                   | <MDL        | <MDL        | NA        | NA        | NA             | NA        | <MDL           | <MDL           |
| <b>Breakthrough</b>          | 43      | 16%                                                                   | 2%          | 5%          | <MDL      | <MDL      | <MDL           | NA        | <MDL           | <MDL           |
| <b>Breakthrough</b>          | 59      | 9%                                                                    | <MDL        | <MDL        | <MDL      | <MDL      | <MDL           | NA        | <MDL           | <MDL           |
| <b>Breakthrough</b>          | 35      | 21%                                                                   | 16%         | <MDL        | NA        | NA        | <MDL           | NA        | <MDL           | <MDL           |
| <b>Breakthrough</b>          | 01      | 22%                                                                   | 14%         | 13%         | NA        | NA        | NA             | NA        | <MDL           | <MDL           |
| <b>mean</b>                  |         | <b>18%</b>                                                            | <b>6%</b>   | <b>4%</b>   | <b>NA</b> | <b>NA</b> | <b>&lt;MDL</b> | <b>NA</b> | <b>&lt;MDL</b> | <b>&lt;MDL</b> |



**Table S11:** Pooled coefficients of variation (%) of duplicate air (N = 3) and cloth samples (N = 71) (including only data above MDL)

| Analyte   | Air sample duplicates | Cloth strip duplicates | Cloth piece duplicates | Household clothing items |
|-----------|-----------------------|------------------------|------------------------|--------------------------|
| 6:2 FTOH  | 1.9                   | 28                     | NA                     | 41                       |
| 8:2 FTOH  | 5.8                   | 46                     | 16                     | 47                       |
| 10:2 FTOH | 2.8                   | 18                     | 16                     | 42                       |
| 8:2 FTAC  | 6.3                   | NA                     | NA                     | NA                       |
| 10:2 FTAC | 1.1                   | NA                     | NA                     | NA                       |
| EtFOSA    | 0.11                  | 27                     | NA                     | 48                       |
| MeFOSA    | NA                    | NA                     | NA                     | NA                       |
| MeFOSE    | 2.0                   | 4.8                    | 11                     | 81                       |
| EtFOSE    | 3.1                   | 4.8                    | 10                     | 115                      |

**Table S12:** Pooled coefficient of variation (%) of repeat air (N = 30), cloth strip (N = 26) and cloth piece (N = 16) sample GC-MS analysis (including only data above MDL)

| Analyte   | Air sample repeats | Cloth strip repeats | Cloth piece repeats |
|-----------|--------------------|---------------------|---------------------|
| 6:2 FTOH  | 23                 | 1.0                 | NA                  |
| 8:2 FTOH  | 8.9                | 5.6                 | 5.1                 |
| 10:2 FTOH | 5.7                | 28                  | 1.6                 |
| 8:2 FTAC  | 5.5                | NA                  | NA                  |
| 10:2 FTAC | 2.8                | NA                  | NA                  |
| EtFOSA    | 15                 | NA                  | 65                  |
| MeFOSA    | NA                 | NA                  | NA                  |
| MeFOSE    | 5.0                | 8.8                 | 0.9                 |
| EtFOSE    | 6.7                | 26                  | 2.5                 |

**Table S13:** Recovery (%) of neutral PFAS (150 ng spiked mass per analyte) from cloth strips (positive controls) after 11.2 months of storage

| Analyte   | CS PC-01 | CS PC-02 | CS PC-03 | Mean ± std. dev. |
|-----------|----------|----------|----------|------------------|
| 6:2 FTOH  | 89       | 83       | 90       | 88 ± 3           |
| 8:2 FTOH  | 113      | 114      | 107      | 111 ± 3          |
| 10:2 FTOH | 122      | 123      | 119      | 121 ± 2          |
| 8:2 FTAC  | 81       | 80       | 76       | 79 ± 2           |
| 10:2 FTAC | 75       | 78       | 76       | 76 ± 1           |
| EtFOSA    | 82       | 83       | 80       | 82 ± 1           |
| MeFOSA    | 66       | 66       | 64       | 65 ± 1           |
| MeFOSE    | 117      | 117      | 112      | 115 ± 2          |
| EtFOSE    | 108      | 109      | 105      | 107 ± 2          |

**Table S14:** Quantifying and qualifying ions used for PFAS analysis in SIM mode (EI source). Ions were determined and assigned based on the literature<sup>4, 12-18</sup> and in-house method development

| Analyte        | Quantifying ion (m/z) | Qualifying ion (m/z) |
|----------------|-----------------------|----------------------|
| 13C-6:2 FTOH   | 348                   | 131                  |
| 13C -8:2 FTOH  | 448                   | 131                  |
| 13C -10:2 FTOH | 509                   | 131                  |
| d-EtFOSA       | 450                   | 113                  |
| d-MeFOSA       | 97                    | 450                  |
| d7-MeFOSE      | 531                   | 467                  |
| 6:2 FTOH       | 344                   | 131                  |
| 8:2 FTOH       | 405                   | 131                  |
| 10:2 FTOH      | 505                   | 131                  |
| 8:2 FTAC       | 518                   | 55                   |
| 10:2 FTAC      | 618                   | 55                   |
| EtFOSA         | 448                   | 108                  |
| MeFOSA         | 94                    | 448                  |
| MeFOSE         | 526                   | 462                  |
| EtFOSE         | 540                   | 448                  |

#### Section S5: Calculation of across-home and within-home variability of total-air and gas-phase samples

Total-air samples and gas-phase samples were assessed separately in these calculations. To calculate the across-home variability (AHV, %), samples were attributed to either the summer (July-September), the fall (October-December), or the winter (January-April) sampling period. For example, for the gas-phase samples, 10 samples were collected in the summer sampling period, 5 samples were collected in the fall, and 10 samples were collected in the winter sampling period. No more than one sample per home was collected in any one season. Then, the standard deviation across homes was calculated for each compound and season. Standard deviations were then pooled across seasons ( $s_{pooled}$ ) as follows:

$$s_{pooled} = \sqrt{\frac{\sum(n_i - 1) \cdot s_i^2}{\sum n_i - N}} \quad \text{Eq. 4}$$

Where  $s_i$  is the standard deviation of the group, in this case "season  $i$ ,"  $n_i$  is the number of measurements in the group, and  $N$  is the total number of groups that are pooled, in this case  $N = 3$  for three seasons.

The AHV is then the pooled coefficient of variation (CV, %) based on  $s_{pooled}$

$$CV (\%) = \frac{s_{pooled}}{\bar{X}} \cdot 100\% \quad \text{Eq. 5}$$

Where  $\bar{X}$  is the mean over all data points, in this example the mean of all gas-phase concentrations from all homes, calculated as described in Eq. 2.

The within-home variability (WHV, %) was similarly calculated as the pooled coefficient of variation (Eq. 5), but where the pooled standard deviation is calculated by defining each group as the samples from the same home. Total-air samples were collected only twice in each home. For pairs, the pooled standard deviation ( $s_{pooled}$ ) is calculated as follows:

$$s_{pooled} = \sqrt{\frac{\sum d_i^2}{2 \cdot N}} \quad \text{for pairs} \quad \text{Eq. 6}$$

Where  $d_i$  is the difference between the two data points in group  $i$ , in this case the difference between the two concentrations measured in home  $i$ , and  $N$  is the total number of data pairs (here,  $N = 10$ , for the number of homes included). Gas-phase samples were collected twice in many homes, but some homes had three gas-phase samples. Thus,  $s_{pooled}$  was calculated using Eq. 4, substituting  $d_i$  for  $s_i$  when  $n_i = 2$ .

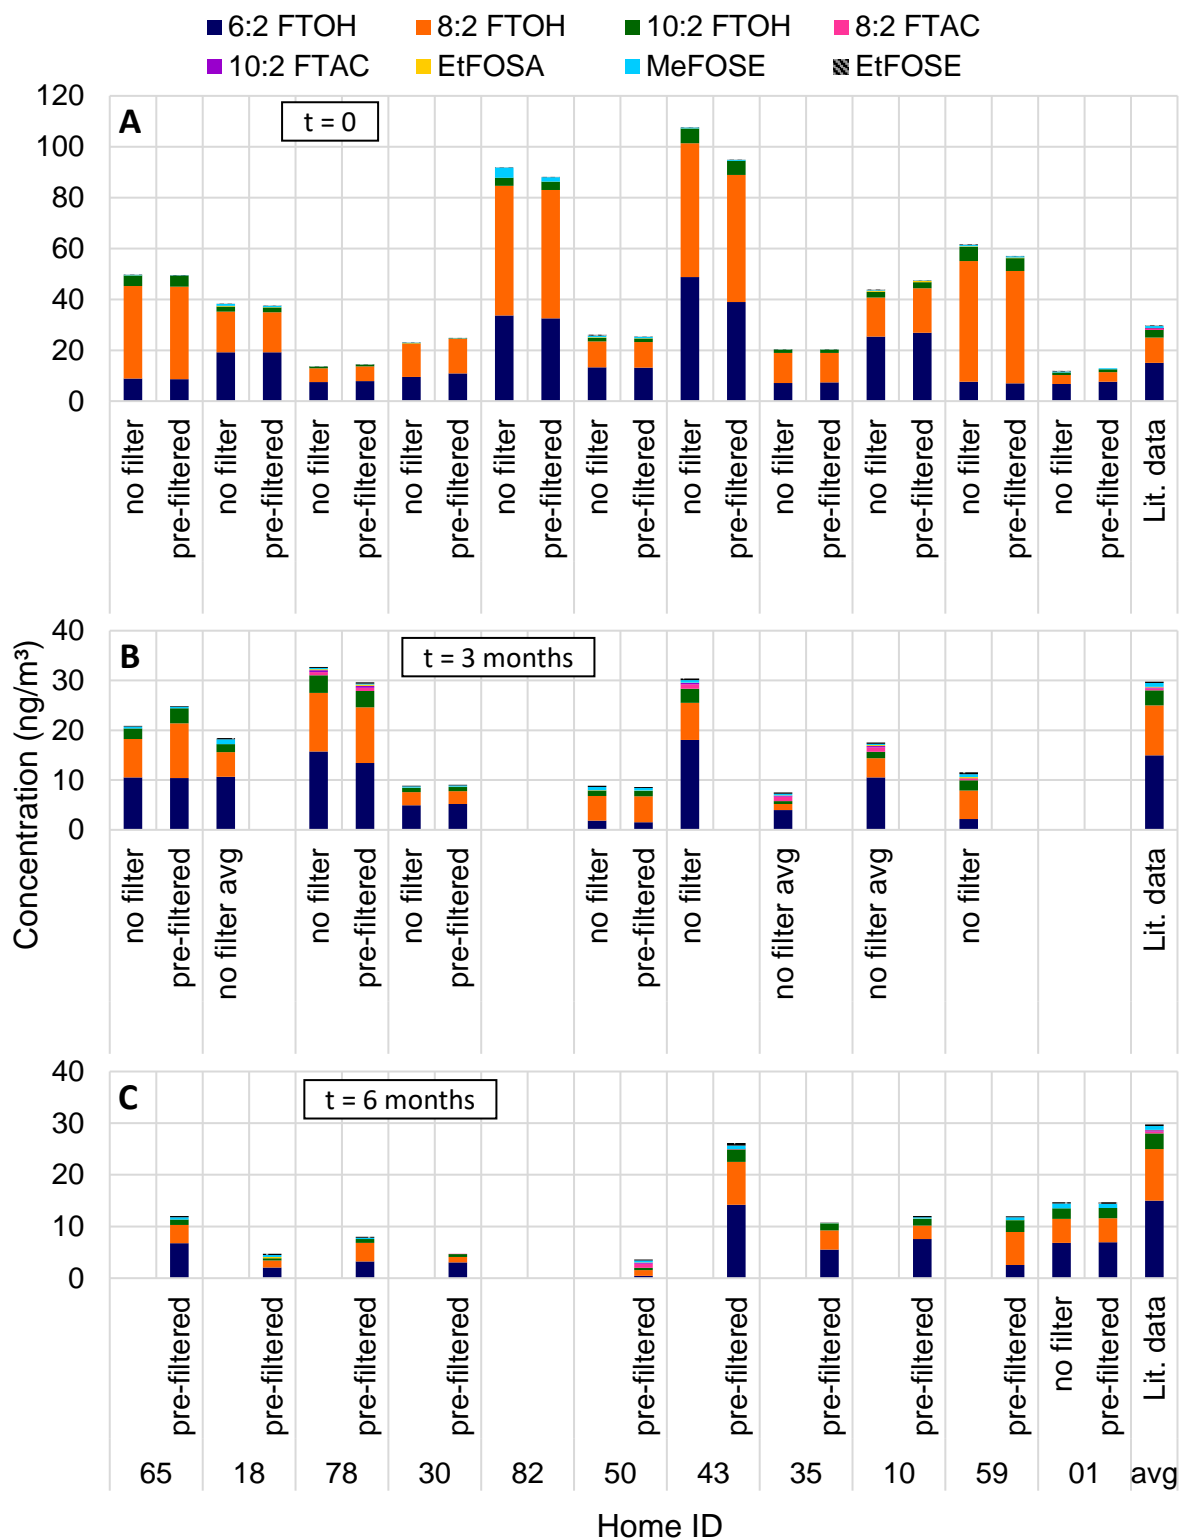

**Figure S8:** Air concentration profiles for neutral PFAS in homes measured during A) the first sampling visit (t = 0), B) the second sampling visit (t = 3 months), and C) the third sampling visit (t = 6 months). The label “no filter” refers to total-air samples and “pre-filtered” refers to gas-phase samples. The bar with results for “Lit. data” is based on multiple studies.<sup>16, 19-26</sup> MeFOSA was not detected in any samples and is therefore not shown. If there is no x-axis label, then no sample was collected for that home during that sampling period.

**Table S15:** Neutral PFAS in total-air and gas-phase samples. “nd” = not detected. Results >MDL are printed in bold. For calculation of means and standard deviations, nd was replaced by 0

| Time step    | Home ID | Sample type   | Air Concentration (ng m <sup>-3</sup> ) |          |           |          |           |        |        |        |        |
|--------------|---------|---------------|-----------------------------------------|----------|-----------|----------|-----------|--------|--------|--------|--------|
|              |         |               | 6:2 FTOH                                | 8:2 FTOH | 10:2 FTOH | 8:2 FTAC | 10:2 FTAC | EtFOSA | MeFOSA | MeFOSE | EtFOSE |
| t = 0        | 65      | total air     | 8.83                                    | 36.36    | 4.20      | nd       | nd        | 0.05   | nd     | 0.19   | 0.05   |
| t = 0        | 65      | gas phase     | 8.58                                    | 36.41    | 4.36      | nd       | nd        | nd     | nd     | 0.10   | 0.02   |
| t = 0        | 18      | total air     | 19.25                                   | 15.92    | 2.05      | nd       | nd        | 0.16   | nd     | 0.77   | 0.15   |
| t = 0        | 18      | gas phase     | 19.19                                   | 15.79    | 1.81      | nd       | nd        | 0.15   | nd     | 0.56   | 0.06   |
| t = 0        | 78      | total air     | 7.51                                    | 5.40     | 0.64      | nd       | nd        | 0.04   | nd     | 0.09   | 0.03   |
| t = 0        | 78      | gas phase     | 7.88                                    | 5.77     | 0.61      | nd       | nd        | 0.03   | nd     | 0.06   | 0.02   |
| t = 0        | 30      | total air     | 9.48                                    | 13.07    | 0.21      | nd       | nd        | 0.07   | nd     | 0.09   | 0.05   |
| t = 0        | 30      | gas phase     | 10.90                                   | 13.60    | 0.05      | nd       | nd        | 0.10   | nd     | 0.07   | 0.04   |
| t = 0        | 82      | total air     | 33.63                                   | 51.01    | 3.15      | nd       | nd        | 0.02   | nd     | 4.06   | 0.05   |
| t = 0        | 82      | gas phase     | 32.59                                   | 50.47    | 3.24      | nd       | nd        | 0.01   | nd     | 1.77   | 0.02   |
| t = 0        | 50      | total air     | 13.31                                   | 10.21    | 1.39      | nd       | nd        | 0.15   | nd     | 0.69   | 0.30   |
| t = 0        | 50      | gas phase     | 13.14                                   | 10.10    | 1.32      | nd       | nd        | 0.13   | nd     | 0.53   | 0.20   |
| t = 0        | 43      | total air     | 48.80                                   | 52.58    | 5.73      | nd       | nd        | 0.04   | nd     | 0.33   | 0.11   |
| t = 0        | 43      | gas phase     | 38.95                                   | 49.90    | 5.59      | nd       | nd        | 0.05   | nd     | 0.30   | 0.09   |
| t = 0        | 35      | total air     | 7.15                                    | 11.77    | 1.32      | nd       | nd        | 0.06   | nd     | 0.08   | 0.05   |
| t = 0        | 35      | gas phase     | 7.34                                    | 11.63    | 1.27      | nd       | nd        | 0.07   | nd     | 0.07   | 0.05   |
| t = 0        | 10      | total air     | 25.31                                   | 15.43    | 2.19      | nd       | nd        | 0.48   | nd     | 0.27   | 0.20   |
| t = 0        | 10      | gas phase     | 26.83                                   | 17.50    | 2.40      | nd       | nd        | 0.46   | nd     | 0.22   | 0.13   |
| t = 0        | 59      | total air     | 7.66                                    | 47.36    | 5.61      | nd       | nd        | 0.20   | nd     | 0.57   | 0.20   |
| t = 0        | 59      | gas phase     | 7.02                                    | 44.20    | 4.99      | nd       | nd        | 0.26   | nd     | 0.46   | 0.16   |
| t = 0        | 01      | total air     | 6.78                                    | 3.46     | 1.02      | nd       | nd        | nd     | nd     | 0.39   | 0.24   |
| t = 0        | 01      | gas phase     | 7.63                                    | 3.81     | 1.12      | nd       | nd        | nd     | nd     | 0.30   | nd     |
| t = 3 months | 65      | total air     | 10.56                                   | 7.69     | 2.14      | nd       | nd        | nd     | nd     | 0.38   | 0.10   |
| t = 3 months | 65      | gas phase     | 10.38                                   | 11.04    | 2.99      | nd       | nd        | nd     | nd     | 0.34   | 0.11   |
| t = 3 months | 18      | total air avg | 10.69                                   | 4.94     | 1.58      | nd       | nd        | nd     | nd     | 0.97   | 0.29   |
| t = 3 months | 78      | total air     | 15.75                                   | 11.78    | 3.49      | 0.69     | 0.40      | 0.18   | nd     | 0.24   | 0.22   |
| t = 3 months | 78      | gas phase     | 13.46                                   | 11.13    | 3.33      | 0.64     | 0.40      | 0.23   | nd     | 0.22   | 0.21   |
| t = 3 months | 30      | total air     | 4.97                                    | 2.61     | 0.81      | nd       | nd        | 0.07   | nd     | 0.27   | 0.17   |
| t = 3 months | 30      | gas phase     | 5.19                                    | 2.58     | 0.86      | nd       | nd        | 0.07   | nd     | 0.20   | 0.14   |
| t = 3 months | 50      | total air     | 1.84                                    | 4.95     | 1.13      | nd       | nd        | 0.07   | nd     | 0.60   | 0.30   |
| t = 3 months | 50      | gas phase     | 1.56                                    | 5.16     | 1.09      | nd       | nd        | 0.11   | nd     | 0.48   | 0.22   |
| t = 3 months | 43      | total air     | 18.03                                   | 7.47     | 2.83      | 0.91     | 0.27      | 0.07   | nd     | 0.53   | 0.30   |
| t = 3 months | 35      | total air avg | 3.97                                    | 1.24     | 0.55      | 0.92     | 0.19      | 0.07   | nd     | 0.31   | 0.26   |
| t = 3 months | 10      | total air avg | 10.50                                   | 3.87     | 1.31      | 0.87     | 0.30      | 0.20   | nd     | 0.20   | 0.31   |

|                      |                         |           |       |       |      |      |      |      |      |      |      |
|----------------------|-------------------------|-----------|-------|-------|------|------|------|------|------|------|------|
| t = 3 months         | 59                      | total air | 2.18  | 5.74  | 2.03 | 0.39 | 0.03 | 0.25 | nd   | 0.57 | 0.40 |
| t = 6 months         | 65                      | gas phase | 6.78  | 3.54  | 1.05 | nd   | nd   | nd   | nd   | 0.40 | 0.24 |
| t = 6 months         | 18                      | gas phase | 2.08  | 1.34  | 0.42 | nd   | nd   | 0.23 | nd   | 0.40 | 0.23 |
| t = 6 months         | 78                      | gas phase | 3.24  | 3.60  | 0.76 | nd   | nd   | nd   | nd   | 0.20 | 0.22 |
| t = 6 months         | 30                      | gas phase | 3.04  | 1.04  | 0.56 | 0.03 | nd   | nd   | nd   | nd   | nd   |
| t = 6 months         | 50                      | gas phase | 0.46  | 1.12  | 0.39 | 0.83 | 0.18 | 0.09 | nd   | 0.33 | 0.23 |
| t = 6 months         | 43                      | gas phase | 14.19 | 8.30  | 2.46 | 0.04 | 0.03 | nd   | nd   | 0.65 | 0.50 |
| t = 6 months         | 35                      | gas phase | 5.54  | 3.68  | 1.36 | nd   | nd   | 0.06 | nd   | 0.02 | 0.02 |
| t = 6 months         | 10                      | gas phase | 7.57  | 2.59  | 1.31 | nd   | nd   | 0.03 | nd   | 0.29 | 0.04 |
| t = 6 months         | 59                      | gas phase | 2.56  | 6.38  | 2.27 | nd   | nd   | 0.01 | nd   | 0.57 | 0.21 |
| t = 6 months         | 01                      | total air | 6.83  | 4.63  | 2.05 | nd   | nd   | nd   | nd   | 0.90 | 0.29 |
| t = 6 months         | 01                      | gas phase | 6.95  | 4.64  | 1.99 | nd   | nd   | nd   | nd   | 0.82 | 0.29 |
| all samples (N = 46) | MDL                     |           | 0.20  | 0.10  | 0.11 | 0.09 | 0.10 | 0.12 | 0.13 | 0.03 | 0.03 |
|                      | # detect > MDL          |           | 46    | 46    | 45   | 7    | 6    | 13   | 0    | 44   | 40   |
|                      | % detect > MDL          |           | 100%  | 100%  | 98%  | 15%  | 13%  | 28%  | 0%   | 96%  | 87%  |
| total air (N = 21)   | # detect > MDL          |           | 21    | 21    | 21   | 5    | 4    | 7    | 0    | 21   | 21   |
|                      | % detect > MDL          |           | 100%  | 100%  | 100% | 24%  | 19%  | 33%  | 0%   | 100% | 100% |
|                      | median (all samples)    |           | 9.48  | 7.69  | 2.03 | 0.00 | 0.00 | 0.07 | 0.00 | 0.38 | 0.20 |
|                      | mean (all samples)      |           | 13.00 | 15.12 | 2.16 | 0.18 | 0.06 | 0.10 | 0.00 | 0.60 | 0.19 |
|                      | std. dev. (all samples) |           | 10.99 | 16.12 | 1.50 | 0.34 | 0.12 | 0.11 | 0.00 | 0.82 | 0.11 |
|                      | min (all samples)       |           | 1.84  | 1.24  | 0.21 | 0.00 | 0.00 | 0.00 | 0.00 | 0.08 | 0.03 |
|                      | max (all samples)       |           | 48.80 | 52.58 | 5.73 | 0.92 | 0.40 | 0.48 | 0.00 | 4.06 | 0.40 |
| gas phase (N = 25)   | # detect >MDL           |           | 25    | 25    | 24   | 2    | 2    | 6    | 0    | 23   | 19   |
|                      | % detect >MDL           |           | 100%  | 100%  | 96%  | 8%   | 8%   | 24%  | 0%   | 92%  | 76%  |
|                      | median (all samples)    |           | 7.57  | 6.38  | 1.32 | nd   | nd   | 0.05 | nd   | 0.30 | 0.13 |
|                      | mean (all samples)      |           | 10.52 | 13.01 | 1.90 | 0.06 | 0.02 | 0.08 | 0.00 | 0.37 | 0.14 |
|                      | std. dev. (all samples) |           | 9.43  | 14.93 | 1.44 | 0.20 | 0.08 | 0.11 | 0.00 | 0.35 | 0.12 |
|                      | min (all samples)       |           | 0.46  | 1.04  | 0.05 | nd   | nd   | nd   | nd   | nd   | nd   |
|                      | max (all samples)       |           | 38.95 | 50.47 | 5.59 | 0.83 | 0.40 | 0.46 | nd   | 1.77 | 0.50 |

**Table S16:** Neutral PFAS in suspended cloth strip samples (Sampler A). N = 143 samples, including 71 duplicates. “nd” = not detected. Results >MDL are printed in bold. For calculation of means and standard deviations, nd was replaced by 0

| Duration of deployment (days) | Home ID | Sample ID | Cloth Strip Concentration (ng cm <sup>-2</sup> ) |              |              |          |           |        |              |        |              |              |
|-------------------------------|---------|-----------|--------------------------------------------------|--------------|--------------|----------|-----------|--------|--------------|--------|--------------|--------------|
|                               |         |           | 6:2 FTOH                                         | 8:2 FTOH     | 10:2 FTOH    | 8:2 FTAC | 10:2 FTAC | EtFOSA | MeFOSA       | M-FOSE | EtFOSE       |              |
| 0                             | 65      | strip A   | nd                                               | nd           | nd           | nd       | nd        | nd     | nd           | nd     | nd           | nd           |
| 0                             | 65      | strip B   | nd                                               | nd           | nd           | nd       | nd        | nd     | nd           | nd     | nd           | nd           |
| 1                             | 65      | strip A   | nd                                               | nd           | nd           | nd       | nd        | nd     | nd           | nd     | nd           | nd           |
| 1                             | 65      | strip B   | nd                                               | nd           | nd           | nd       | nd        | nd     | nd           | nd     | nd           | nd           |
| 6                             | 65      | strip 04  | 0.003                                            | nd           | nd           | nd       | nd        | nd     | nd           | nd     | nd           | nd           |
| 6                             | 65      | strip 07  | 0.001                                            | nd           | nd           | nd       | nd        | nd     | nd           | nd     | nd           | nd           |
| 31                            | 65      | strip 02  | 0.015                                            | nd           | nd           | nd       | nd        | nd     | nd           | nd     | <b>0.080</b> | <b>0.046</b> |
| 31                            | 65      | strip 05  | 0.019                                            | nd           | nd           | nd       | nd        | nd     | nd           | nd     | <b>0.079</b> | <b>0.046</b> |
| 91                            | 65      | strip 03  | 0.009                                            | nd           | nd           | nd       | nd        | nd     | nd           | nd     | <b>0.065</b> | <b>0.039</b> |
| 91                            | 65      | strip 06  | 0.009                                            | nd           | nd           | nd       | nd        | nd     | nd           | nd     | <b>0.062</b> | <b>0.037</b> |
| 188                           | 65      | strip 09  | 0.009                                            | 0.010        | <b>0.015</b> | nd       | nd        | nd     | 0.002        | nd     | <b>0.057</b> | <b>0.021</b> |
| 188                           | 65      | strip 11  | 0.003                                            | 0.011        | <b>0.017</b> | nd       | nd        | nd     | 0.002        | nd     | <b>0.057</b> | <b>0.020</b> |
| 273                           | 65      | strip 08  | 0.013                                            | <b>0.037</b> | 0.004        | nd       | nd        | nd     | <b>0.023</b> | nd     | <b>0.089</b> | <b>0.054</b> |
| 273                           | 65      | strip 12  | 0.027                                            | <b>0.032</b> | 0.003        | nd       | nd        | nd     | <b>0.022</b> | nd     | <b>0.081</b> | <b>0.049</b> |
| 0                             | 18      | strip A   | nd                                               | nd           | nd           | nd       | nd        | nd     | nd           | nd     | <b>0.024</b> | <b>0.018</b> |
| 0                             | 18      | strip B   | nd                                               | nd           | nd           | nd       | nd        | nd     | nd           | nd     | <b>0.023</b> | 0.017        |
| 1                             | 18      | strip 01  | nd                                               | nd           | nd           | nd       | nd        | nd     | nd           | nd     | <b>0.027</b> | <b>0.019</b> |
| 1                             | 18      | strip 10  | nd                                               | nd           | nd           | nd       | nd        | nd     | nd           | nd     | <b>0.026</b> | <b>0.018</b> |
| 6                             | 18      | strip 04  | nd                                               | nd           | nd           | nd       | nd        | nd     | nd           | nd     | <b>0.043</b> | <b>0.024</b> |
| 6                             | 18      | strip 07  | nd                                               | nd           | nd           | nd       | nd        | nd     | nd           | nd     | <b>0.047</b> | <b>0.027</b> |
| 31                            | 18      | strip 02  | nd                                               | nd           | nd           | nd       | nd        | nd     | nd           | nd     | <b>0.110</b> | <b>0.061</b> |
| 31                            | 18      | strip 05  | nd                                               | nd           | nd           | nd       | nd        | nd     | nd           | nd     | <b>0.107</b> | <b>0.060</b> |
| 91                            | 18      | strip 05  | 0.014                                            | nd           | nd           | nd       | nd        | nd     | nd           | nd     | <b>0.162</b> | <b>0.084</b> |
| 91                            | 18      | strip 06  | 0.014                                            | nd           | nd           | nd       | nd        | nd     | nd           | nd     | <b>0.166</b> | <b>0.089</b> |
| 182                           | 18      | strip 08  | 0.016                                            | 0.011        | 0.010        | nd       | nd        | nd     | 0.002        | nd     | <b>0.208</b> | <b>0.104</b> |
| 182                           | 18      | strip 11  | 0.011                                            | 0.012        | 0.010        | nd       | nd        | nd     | 0.002        | nd     | <b>0.199</b> | <b>0.103</b> |
| 276                           | 18      | strip 09  | 0.050                                            | <b>0.034</b> | 0.003        | nd       | nd        | nd     | <b>0.025</b> | nd     | <b>0.256</b> | <b>0.135</b> |
| 276                           | 18      | strip 12  | 0.011                                            | 0.004        | 0.003        | nd       | nd        | nd     | <b>0.026</b> | nd     | <b>0.250</b> | <b>0.135</b> |
| 0                             | 78      | strip A   | nd                                               | nd           | nd           | nd       | nd        | nd     | nd           | nd     | <b>0.022</b> | 0.017        |
| 0                             | 78      | strip B   | nd                                               | nd           | nd           | nd       | nd        | nd     | nd           | nd     | <b>0.022</b> | 0.017        |
| NA                            | 78      | NA        | NA                                               | NA           | NA           | NA       | NA        | NA     | NA           | NA     | NA           | NA           |
| NA                            | 78      | NA        | NA                                               | NA           | NA           | NA       | NA        | NA     | NA           | NA     | NA           | NA           |
| NA                            | 78      | NA        | NA                                               | NA           | NA           | NA       | NA        | NA     | NA           | NA     | NA           | NA           |
| NA                            | 78      | NA        | NA                                               | NA           | NA           | NA       | NA        | NA     | NA           | NA     | NA           | NA           |

|     |    |          |              |              |              |    |    |       |    |              |              |
|-----|----|----------|--------------|--------------|--------------|----|----|-------|----|--------------|--------------|
| 31  | 78 | strip 04 | nd           | nd           | nd           | nd | nd | nd    | nd | 0.029        | 0.020        |
| NA  | 78 | NA       | NA           | NA           | NA           | NA | NA | NA    | NA | NA           | NA           |
| 91  | 78 | strip 01 | 0.012        | <b>0.090</b> | <b>0.108</b> | nd | nd | nd    | nd | <b>0.042</b> | <b>0.036</b> |
| 91  | 78 | strip 05 | 0.005        | <b>0.054</b> | <b>0.089</b> | nd | nd | nd    | nd | <b>0.039</b> | <b>0.033</b> |
| 182 | 78 | strip 03 | 0.029        | <b>0.046</b> | <b>0.063</b> | nd | nd | 0.002 | nd | <b>0.052</b> | 0.003        |
| 182 | 78 | strip 07 | 0.019        | <b>0.036</b> | <b>0.040</b> | nd | nd | 0.001 | nd | <b>0.045</b> | 0.003        |
| 228 | 78 | strip 02 | 0.013        | <b>0.052</b> | <b>0.053</b> | nd | nd | 0.002 | nd | <b>0.052</b> | nd           |
| 228 | 78 | strip 06 | 0.040        | <b>0.046</b> | <b>0.043</b> | nd | nd | 0.002 | nd | <b>0.053</b> | nd           |
| 0   | 30 | strip A  | 0.040        | nd           | nd           | nd | nd | nd    | nd | nd           | nd           |
| 0   | 30 | strip B  | 0.052        | nd           | nd           | nd | nd | nd    | nd | nd           | nd           |
| 1   | 30 | strip 01 | nd           | nd           | 0.003        | nd | nd | nd    | nd | 0.002        | 0.002        |
| 1   | 30 | strip 10 | 0.005        | nd           | 0.003        | nd | nd | nd    | nd | 0.002        | 0.002        |
| 6   | 30 | strip 04 | 0.009        | nd           | 0.004        | nd | nd | nd    | nd | 0.020        | <b>0.035</b> |
| 6   | 30 | strip 07 | 0.012        | nd           | 0.003        | nd | nd | nd    | nd | 0.017        | <b>0.029</b> |
| 31  | 30 | strip 02 | 0.018        | nd           | nd           | nd | nd | nd    | nd | <b>0.052</b> | <b>0.044</b> |
| 31  | 30 | strip 05 | 0.019        | nd           | nd           | nd | nd | nd    | nd | <b>0.057</b> | <b>0.048</b> |
| 91  | 30 | strip 03 | 0.017        | nd           | nd           | nd | nd | nd    | nd | <b>0.064</b> | <b>0.051</b> |
| 91  | 30 | strip 06 | 0.034        | nd           | nd           | nd | nd | nd    | nd | <b>0.067</b> | <b>0.055</b> |
| 196 | 30 | strip 08 | <b>0.059</b> | nd           | 0.003        | nd | nd | 0.003 | nd | <b>0.081</b> | <b>0.061</b> |
| 196 | 30 | strip 11 | 0.031        | nd           | 0.002        | nd | nd | 0.003 | nd | <b>0.066</b> | <b>0.050</b> |
| 202 | 30 | strip 09 | 0.025        | nd           | 0.003        | nd | nd | 0.003 | nd | <b>0.070</b> | <b>0.052</b> |
| 202 | 30 | strip 12 | 0.034        | 0.003        | 0.003        | nd | nd | 0.003 | nd | <b>0.067</b> | <b>0.050</b> |
| 0   | 50 | strip A  | 0.039        | nd           | nd           | nd | nd | nd    | nd | nd           | nd           |
| 0   | 50 | strip B  | 0.041        | nd           | nd           | nd | nd | nd    | nd | nd           | nd           |
| 1   | 50 | strip 01 | 0.024        | <b>0.020</b> | <b>0.018</b> | nd | nd | 0.001 | nd | <b>0.036</b> | <b>0.029</b> |
| 1   | 50 | strip 03 | 0.021        | <b>0.019</b> | <b>0.014</b> | nd | nd | 0.001 | nd | <b>0.033</b> | <b>0.027</b> |
| 6   | 50 | strip 04 | 0.028        | <b>0.022</b> | <b>0.016</b> | nd | nd | 0.001 | nd | <b>0.063</b> | <b>0.047</b> |
| 6   | 50 | strip 06 | 0.025        | 0.018        | <b>0.015</b> | nd | nd | 0.001 | nd | <b>0.068</b> | <b>0.049</b> |
| 31  | 50 | strip 02 | 0.026        | nd           | nd           | nd | nd | nd    | nd | <b>0.170</b> | <b>0.120</b> |
| 31  | 50 | strip 05 | 0.020        | nd           | nd           | nd | nd | nd    | nd | <b>0.171</b> | <b>0.119</b> |
| 91  | 50 | strip 07 | 0.029        | nd           | nd           | nd | nd | nd    | nd | <b>0.201</b> | <b>0.155</b> |
| 91  | 50 | strip 10 | 0.014        | nd           | nd           | nd | nd | nd    | nd | <b>0.209</b> | <b>0.155</b> |
| 175 | 50 | strip 08 | 0.022        | <b>0.021</b> | <b>0.014</b> | nd | nd | 0.001 | nd | <b>0.222</b> | <b>0.238</b> |
| 175 | 50 | strip 11 | 0.022        | <b>0.021</b> | <b>0.013</b> | nd | nd | 0.001 | nd | <b>0.214</b> | <b>0.225</b> |
| 273 | 50 | strip 09 | 0.006        | nd           | 0.002        | nd | nd | 0.005 | nd | <b>0.155</b> | <b>0.242</b> |
| 273 | 50 | strip 10 | nd           | nd           | 0.004        | nd | nd | 0.005 | nd | <b>0.151</b> | <b>0.236</b> |
| 0   | 43 | strip A  | nd           | nd           | nd           | nd | nd | nd    | nd | nd           | nd           |
| 0   | 43 | strip B  | nd           | nd           | nd           | nd | nd | nd    | nd | nd           | nd           |
| 3   | 43 | strip 01 | nd           | 0.005        | 0.010        | nd | nd | nd    | nd | 0.015        | 0.001        |
| 3   | 43 | strip 03 | 0.023        | 0.016        | <b>0.014</b> | nd | nd | nd    | nd | 0.018        | 0.002        |
| 6   | 43 | strip 04 | 0.005        | 0.003        | 0.012        | nd | nd | nd    | nd | <b>0.023</b> | <b>0.031</b> |



|     |    |          |       |              |              |    |    |              |    |              |              |
|-----|----|----------|-------|--------------|--------------|----|----|--------------|----|--------------|--------------|
| 6   | 43 | strip 06 | 0.035 | 0.004        | <b>0.012</b> | nd | nd | nd           | nd | <b>0.024</b> | <b>0.030</b> |
| 31  | 43 | strip 02 | 0.043 | 0.004        | <b>0.041</b> | nd | nd | nd           | nd | <b>0.073</b> | <b>0.044</b> |
| 31  | 43 | strip 05 | 0.055 | 0.004        | <b>0.048</b> | nd | nd | nd           | nd | <b>0.072</b> | <b>0.046</b> |
| 91  | 43 | strip 07 | 0.026 | nd           | nd           | nd | nd | nd           | nd | <b>0.100</b> | <b>0.063</b> |
| 91  | 43 | strip 10 | 0.027 | nd           | nd           | nd | nd | nd           | nd | <b>0.092</b> | <b>0.058</b> |
| 182 | 43 | strip 08 | 0.036 | <b>0.035</b> | <b>0.032</b> | nd | nd | 0.002        | nd | <b>0.116</b> | <b>0.068</b> |
| 182 | 43 | strip 11 | 0.010 | <b>0.032</b> | <b>0.033</b> | nd | nd | 0.001        | nd | <b>0.111</b> | <b>0.064</b> |
| 266 | 43 | strip 09 | 0.009 | 0.001        | 0.006        | nd | nd | nd           | nd | <b>0.091</b> | <b>0.063</b> |
| 266 | 43 | strip 12 | 0.024 | 0.009        | 0.005        | nd | nd | nd           | nd | <b>0.094</b> | <b>0.063</b> |
| 0   | 35 | strip A  | 0.004 | 0.009        | nd           | nd | nd | nd           | nd | nd           | nd           |
| 0   | 35 | strip B  | nd    | nd           | nd           | nd | nd | nd           | nd | nd           | nd           |
| 1   | 35 | strip 01 | 0.002 | nd           | 0.003        | nd | nd | 0.003        | nd | 0.002        | 0.002        |
| 1   | 35 | strip 03 | 0.011 | 0.003        | 0.003        | nd | nd | 0.002        | nd | 0.002        | 0.002        |
| 6   | 35 | strip 04 | 0.014 | nd           | 0.003        | nd | nd | nd           | nd | <b>0.039</b> | nd           |
| 6   | 35 | strip 06 | 0.036 | nd           | 0.003        | nd | nd | nd           | nd | <b>0.034</b> | nd           |
| 31  | 35 | strip 02 | 0.047 | nd           | <b>0.037</b> | nd | nd | nd           | nd | <b>0.047</b> | <b>0.040</b> |
| 31  | 35 | strip 05 | 0.045 | nd           | <b>0.039</b> | nd | nd | nd           | nd | <b>0.047</b> | <b>0.041</b> |
| 98  | 35 | strip 07 | 0.009 | 0.009        | 0.010        | nd | nd | 0.002        | nd | <b>0.027</b> | <b>0.023</b> |
| 98  | 35 | strip 10 | 0.002 | 0.007        | 0.011        | nd | nd | 0.002        | nd | <b>0.026</b> | <b>0.021</b> |
| 182 | 35 | strip 08 | 0.025 | 0.003        | 0.003        | nd | nd | 0.003        | nd | <b>0.060</b> | <b>0.055</b> |
| 182 | 35 | strip 11 | 0.014 | 0.004        | 0.003        | nd | nd | 0.003        | nd | <b>0.057</b> | <b>0.052</b> |
| 220 | 35 | strip 09 | 0.045 | 0.004        | 0.003        | nd | nd | 0.003        | nd | <b>0.058</b> | <b>0.054</b> |
| 220 | 35 | strip 12 | 0.016 | 0.003        | 0.003        | nd | nd | <b>0.020</b> | nd | <b>0.052</b> | <b>0.049</b> |
| 0   | 10 | strip A  | 0.005 | nd           | nd           | nd | nd | nd           | nd | nd           | nd           |
| 0   | 10 | strip B  | nd    | nd           | nd           | nd | nd | nd           | nd | nd           | nd           |
| 1   | 10 | strip 01 | nd    | 0.008        | <b>0.016</b> | nd | nd | 0.002        | nd | 0.002        | 0.002        |
| 1   | 10 | strip 03 | 0.032 | 0.007        | 0.003        | nd | nd | 0.003        | nd | 0.003        | 0.003        |
| 6   | 10 | strip 04 | 0.015 | nd           | nd           | nd | nd | 0.001        | nd | <b>0.047</b> | <b>0.046</b> |
| 6   | 10 | strip 06 | 0.022 | nd           | nd           | nd | nd | 0.000        | nd | <b>0.041</b> | <b>0.042</b> |
| 31  | 10 | strip 02 | 0.040 | nd           | <b>0.034</b> | nd | nd | <b>0.032</b> | nd | <b>0.058</b> | <b>0.050</b> |
| 31  | 10 | strip 05 | 0.047 | nd           | <b>0.037</b> | nd | nd | <b>0.036</b> | nd | <b>0.057</b> | <b>0.050</b> |
| 91  | 10 | strip 07 | 0.004 | 0.006        | 0.012        | nd | nd | 0.001        | nd | <b>0.061</b> | <b>0.054</b> |
| 91  | 10 | strip 10 | 0.006 | 0.008        | <b>0.013</b> | nd | nd | 0.001        | nd | <b>0.059</b> | <b>0.052</b> |
| 175 | 10 | strip 08 | 0.004 | 0.004        | 0.003        | nd | nd | 0.002        | nd | <b>0.095</b> | <b>0.090</b> |
| 175 | 10 | strip 11 | 0.009 | 0.004        | 0.004        | nd | nd | 0.002        | nd | <b>0.103</b> | <b>0.098</b> |
| 254 | 10 | strip 09 | 0.022 | 0.002        | <b>0.025</b> | nd | nd | 0.002        | nd | <b>0.069</b> | <b>0.067</b> |
| 254 | 10 | strip 12 | 0.029 | <b>0.026</b> | <b>0.030</b> | nd | nd | 0.002        | nd | <b>0.074</b> | <b>0.074</b> |
| 0   | 59 | strip A  | 0.001 | nd           | nd           | nd | nd | nd           | nd | nd           | nd           |
| 0   | 59 | strip B  | nd    | nd           | nd           | nd | nd | nd           | nd | nd           | nd           |
| 1   | 59 | strip 01 | 0.005 | 0.001        | 0.004        | nd | nd | nd           | nd | 0.016        | 0.016        |
| 1   | 59 | strip 04 | 0.001 | 0.001        | 0.007        | nd | nd | nd           | nd | 0.002        | 0.002        |

|               |    |          |       |       |       |       |       |       |       |       |       |
|---------------|----|----------|-------|-------|-------|-------|-------|-------|-------|-------|-------|
| 6             | 59 | strip 03 | 0.037 | 0.009 | 0.003 | nd    | nd    | nd    | nd    | 0.048 | nd    |
| 6             | 59 | strip 06 | 0.018 | 0.003 | 0.003 | nd    | nd    | 0.001 | nd    | 0.051 | nd    |
| 30            | 59 | strip 02 | 0.046 | nd    | 0.037 | nd    | nd    | nd    | nd    | 0.061 | 0.036 |
| 30            | 59 | strip 05 | 0.045 | nd    | 0.037 | nd    | nd    | nd    | nd    | 0.062 | 0.036 |
| 91            | 59 | strip 07 | 0.004 | 0.013 | 0.019 | nd    | nd    | 0.002 | nd    | 0.098 | 0.025 |
| 91            | 59 | strip 10 | 0.003 | 0.012 | 0.016 | nd    | nd    | 0.002 | nd    | 0.091 | 0.023 |
| 175           | 59 | strip 08 | 0.010 | 0.003 | 0.003 | nd    | nd    | 0.003 | nd    | 0.128 | 0.055 |
| 175           | 59 | strip 11 | 0.027 | 0.003 | 0.002 | nd    | nd    | 0.002 | nd    | 0.124 | 0.052 |
| 244           | 59 | strip 09 | 0.024 | 0.003 | 0.031 | nd    | nd    | 0.002 | nd    | 0.107 | 0.047 |
| 244           | 59 | strip 12 | 0.024 | 0.021 | 0.029 | nd    | nd    | 0.002 | nd    | 0.106 | 0.047 |
| 0             | 01 | strip A  | 0.006 | nd    |
| 0             | 01 | strip B  | 0.002 | 0.006 | nd    |
| 1             | 01 | strip 01 | 0.025 | 0.023 | 0.019 | nd    | nd    | 0.001 | nd    | 0.030 | 0.001 |
| 1             | 01 | strip 03 | 0.026 | 0.024 | 0.017 | nd    | nd    | 0.001 | nd    | 0.029 | 0.001 |
| 6             | 01 | strip 04 | 0.023 | 0.020 | 0.018 | nd    | nd    | 0.001 | nd    | 0.035 | 0.001 |
| 6             | 01 | strip 06 | 0.027 | 0.021 | 0.019 | nd    | nd    | 0.001 | nd    | 0.040 | 0.001 |
| 31            | 01 | strip 02 | nd    | 0.006 | 0.012 | nd    | nd    | nd    | nd    | 0.052 | 0.016 |
| 31            | 01 | strip 05 | nd    | 0.007 | 0.012 | nd    | nd    | nd    | nd    | 0.049 | 0.014 |
| 84            | 01 | strip 07 | 0.024 | 0.019 | 0.015 | nd    | nd    | 0.001 | nd    | 0.123 | 0.044 |
| 84            | 01 | strip 10 | 0.021 | 0.014 | 0.012 | nd    | nd    | 0.001 | nd    | 0.107 | 0.038 |
| 175           | 01 | strip 08 | 0.025 | 0.003 | 0.003 | nd    | nd    | nd    | nd    | 0.185 | 0.072 |
| 175           | 01 | strip 11 | 0.026 | nd    | 0.003 | nd    | nd    | nd    | nd    | 0.171 | 0.068 |
| 200           | 01 | strip 09 | 0.056 | 0.045 | 0.045 | nd    | nd    | 0.002 | nd    | 0.164 | 0.077 |
| 200           | 01 | strip 12 | 0.063 | nd    | 0.050 | nd    | nd    | 0.002 | nd    | 0.171 | 0.082 |
| 0             | 82 | strip A  | 0.020 | nd    | nd    | nd    | nd    | 0.003 | nd    | 0.003 | 0.003 |
| 0             | 82 | strip B  | 0.029 | nd    | nd    | nd    | nd    | 0.002 | nd    | 0.002 | 0.002 |
| 1             | 82 | strip 01 | 0.029 | 0.025 | 0.031 | nd    | nd    | 0.002 | nd    | 0.034 | 0.003 |
| 1             | 82 | strip 03 | 0.024 | 0.024 | 0.025 | nd    | nd    | 0.002 | nd    | 0.028 | 0.002 |
| 6             | 82 | strip 04 | 0.028 | 0.003 | 0.032 | nd    | nd    | 0.002 | nd    | 0.060 | 0.003 |
| 6             | 82 | strip 06 | 0.031 | 0.003 | 0.029 | nd    | nd    | 0.002 | nd    | 0.051 | 0.002 |
| 32            | 82 | strip 02 | 0.024 | 0.027 | 0.028 | nd    | nd    | 0.002 | nd    | 0.130 | 0.029 |
| 32            | 82 | strip 05 | 0.028 | 0.027 | 0.032 | nd    | nd    | 0.003 | nd    | 0.125 | 0.032 |
| NA            | 82 | NA       | NA    | NA    | NA    | NA    | NA    | NA    | NA    | NA    | NA    |
| NA            | 82 | NA       | NA    | NA    | NA    | NA    | NA    | NA    | NA    | NA    | NA    |
| NA            | 82 | NA       | NA    | NA    | NA    | NA    | NA    | NA    | NA    | NA    | NA    |
| NA            | 82 | NA       | NA    | NA    | NA    | NA    | NA    | NA    | NA    | NA    | NA    |
| NA            | 82 | NA       | NA    | NA    | NA    | NA    | NA    | NA    | NA    | NA    | NA    |
| NA            | 82 | NA       | NA    | NA    | NA    | NA    | NA    | NA    | NA    | NA    | NA    |
| NA            | 82 | NA       | NA    | NA    | NA    | NA    | NA    | NA    | NA    | NA    | NA    |
| MDL           |    |          | 0.059 | 0.018 | 0.012 | 0.006 | 0.006 | 0.007 | 0.008 | 0.021 | 0.017 |
| # detect >MDL |    |          | 2     | 28    | 49    | 0     | 0     | 7     | 0     | 109   | 90    |

|                             |       |       |       |       |       |       |       |       |       |
|-----------------------------|-------|-------|-------|-------|-------|-------|-------|-------|-------|
| <b>% detect &gt;MDL</b>     | 1%    | 20%   | 34%   | 0%    | 0%    | 5%    | 0%    | 76%   | 63%   |
| <b>median (all samples)</b> | 0.016 | 0.002 | 0.003 | nd    | nd    | nd    | nd    | 0.052 | 0.032 |
| <b>mean (all samples)</b>   | 0.018 | 0.008 | 0.012 | 0.000 | 0.000 | 0.002 | 0.000 | 0.065 | 0.040 |
| <b>min (all samples)</b>    | nd    |
| <b>max (all samples)</b>    | 0.063 | 0.090 | 0.108 | nd    | nd    | 0.036 | nd    | 0.256 | 0.242 |

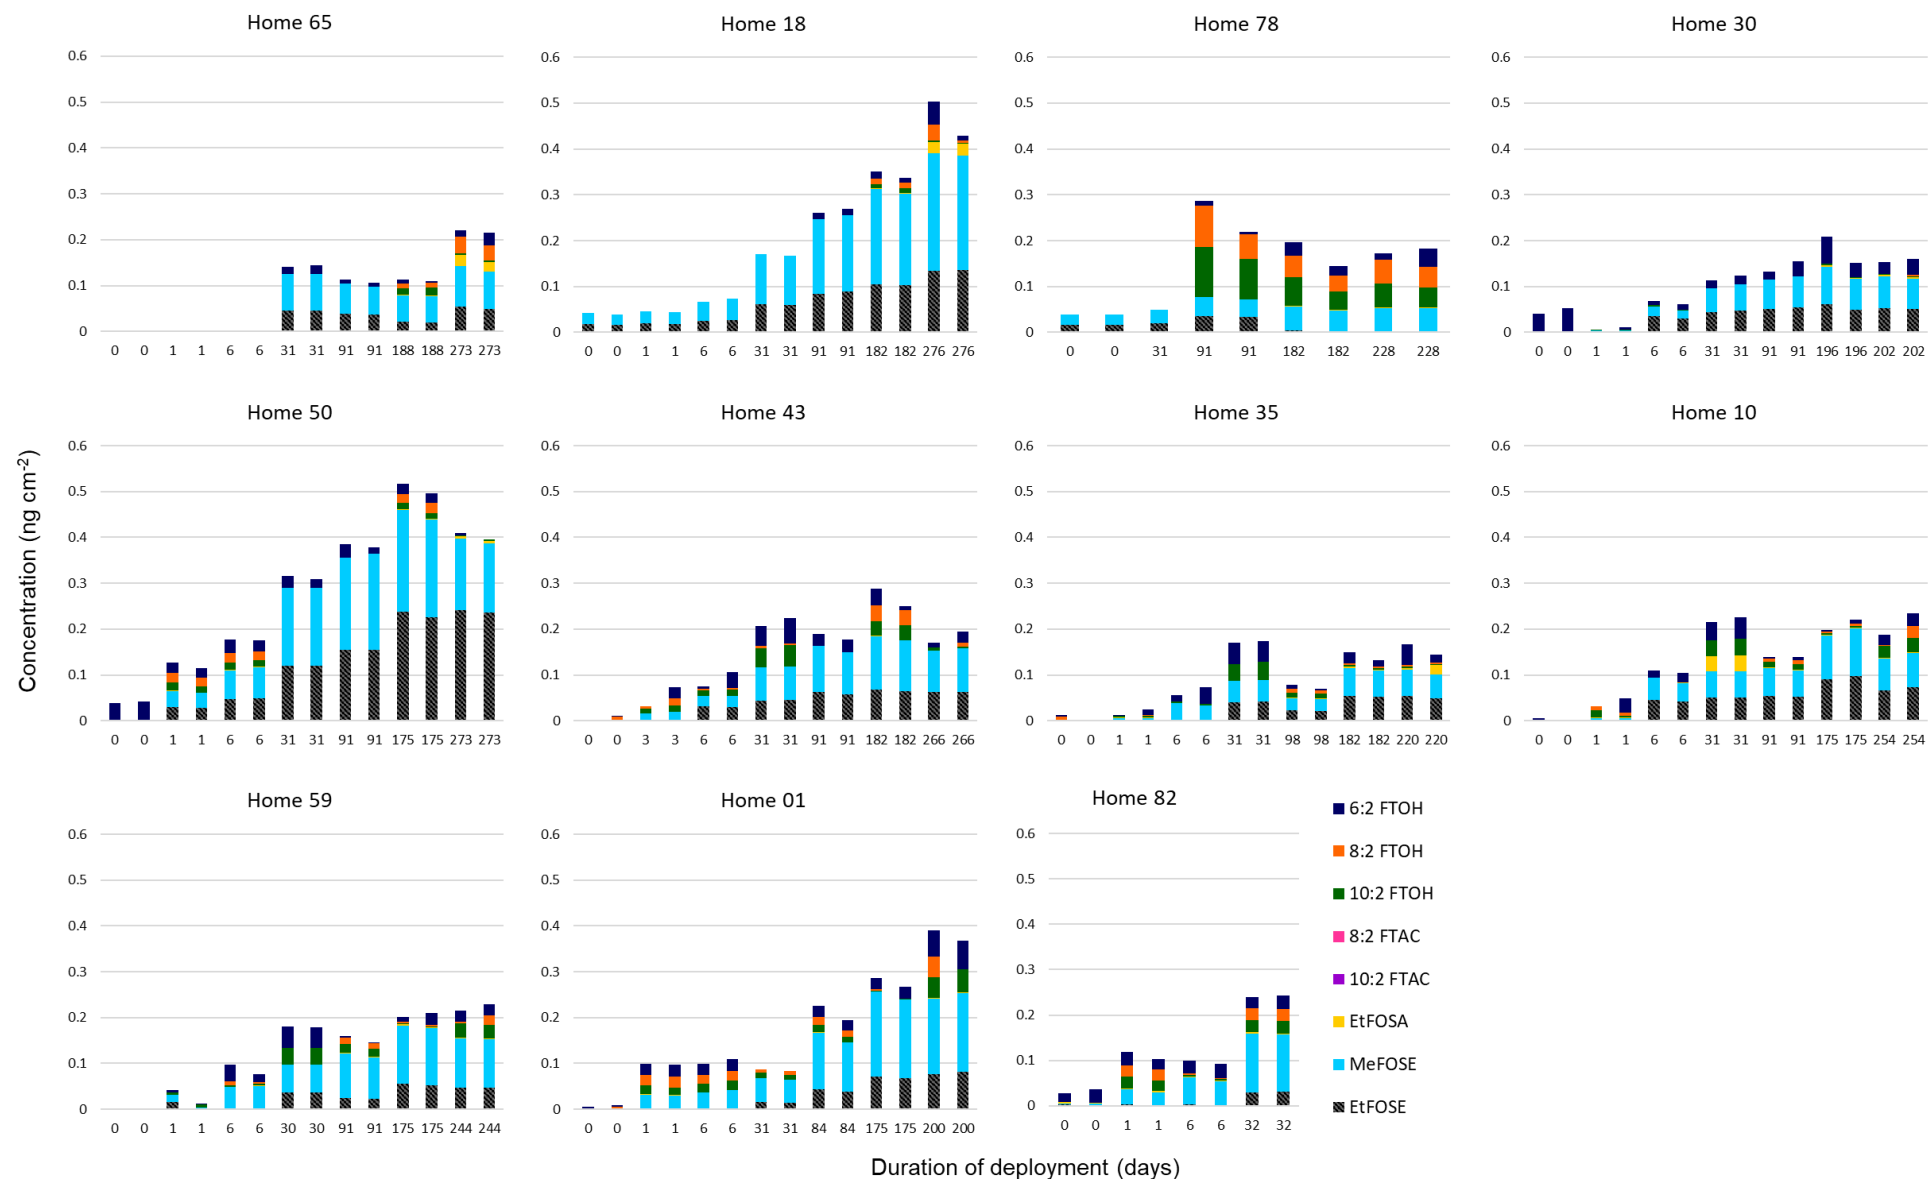

**Figure S9:** Concentration profiles of neutral PFAS in suspended cloth strips (Sampler A) over the duration of deployment at the IPA Campaign homes. If a duration of deployment is indicated, e.g., 1 day for Home 65, but no bar is shown, then a sample was collected but none of the analytes was detected. MeFOSA was not detected in any samples and is therefore not shown.

## Section S6: Statistical analysis of total air and gas phase data

Concentrations of total-air samples were not significantly different ( $\alpha = 0.05$ ) from concentrations of gas-phase samples collected at the same home during the same sampling visit ( $N = 16$ ) for any species except MeFOSE and EtFOSE (**Table S17**), consistent with the current understanding that neutral PFAS are predominantly in the gas phase. The significant difference may indicate that FOSEs partition to airborne particles, although adsorption to the sampling filter is also possible. Note that a paired t-test was used for species with a normal distribution and a Wilcoxon Signed-Rank test was used for those with a non-normal distribution (**Table S17**).

**Table S17:** Statistical comparison of total-air and gas-phase samples ( $\alpha = 0.05$ ). The analysis indicates that total-air and gas-phase concentrations are significantly different for MeFOSE and EtFOSE, but total-air and gas-phase concentrations are not significantly different for 6:2 FTOH, 8:2 FTOH, 10:2 FTOH, and EtFOSA

| Analyte   | Shapiro-Wilk normality test |              |                   |              | Paired t-Test for normally distributed data | Wilcoxon Signed- Rank Test for not-normally distributed data |                |
|-----------|-----------------------------|--------------|-------------------|--------------|---------------------------------------------|--------------------------------------------------------------|----------------|
|           | Total-air samples           |              | Gas-phase samples |              |                                             | p-value                                                      | critical value |
|           | SW test statistic           | distribution | SW test statistic | distribution |                                             |                                                              |                |
| 6:2 FTOH  | 0.7849                      | not normal   | 0.8205            | not normal   | -                                           | 35                                                           | <b>60</b>      |
| 8:2 FTOH  | 0.7692                      | not normal   | 0.7871            | not normal   | -                                           | 35                                                           | <b>67</b>      |
| 10:2 FTOH | 0.8940                      | normal       | 0.9336            | normal       | 0.93                                        | -                                                            | -              |
| 8:2 FTAC  | 0.2727                      | not normal   | 0.2727            | not normal   | -                                           | NA                                                           | NA*            |
| 10:2 FTAC | 0.2727                      | not normal   | 0.2727            | not normal   | -                                           | NA                                                           | NA*            |
| EtFOSA    | 0.7465                      | not normal   | 0.8054            | not normal   | -                                           | 21                                                           | <b>40</b>      |
| MeFOSA    | NA*                         | NA           | NA*               | NA           | -                                           | -                                                            | -              |
| MeFOSE    | 0.5139                      | not normal   | 0.7282            | not normal   | -                                           | <b>35</b>                                                    | 0              |
| EtFOSE    | 0.9104                      | normal       | 0.9322            | normal       | <b>0.008</b>                                | -                                                            | -              |

\*not detected in any of the samples

**Table S18:** Estimated characteristic time  $\tau$  and measured equilibration time of neutral PFAS in cloth strips.  $\tau$  is calculated as a function of  $K_{oa}$ , the cloth thickness, and the deposition velocity  $v_d$ .<sup>27</sup>  $v_d$  can vary based on the geometry of the object and environmental conditions, but is typically assumed to be in the range of 1-10 m h<sup>-1</sup>.<sup>27-29</sup> Weschler and Nazaroff (2008) used  $v_d = 3$  m h<sup>-1</sup>.<sup>27</sup>

| Analyte   | Characteristic time to reach equilibrium based on air concentrations (h) |                                 | Average time range to reach equilibrium based on accumulation rates (h) |
|-----------|--------------------------------------------------------------------------|---------------------------------|-------------------------------------------------------------------------|
|           | For $v_d = 1-10$ m h <sup>-1</sup>                                       | For $v_d = 3$ m h <sup>-1</sup> |                                                                         |
| 6:2 FTOH  | 12-1.2                                                                   | 3.8                             | <28                                                                     |
| 8:2 FTOH  | 36-3.6                                                                   | 12                              | 28-143                                                                  |
| 10:2 FTOH | 92-9.2                                                                   | 31                              | 28-143                                                                  |
| 8:2 FTAC  | 232.3                                                                    | 7.7                             | -                                                                       |
| 10:2 FTAC | 46-4.6                                                                   | 15                              | -                                                                       |
| MeFOSA    | 183-18                                                                   | 61                              | -                                                                       |
| EtFOSA    | 289-29                                                                   | 96                              | 28-143                                                                  |
| MeFOSE    | 2299-230                                                                 | 766                             | 4349-5846                                                               |
| EtFOSE    | 4587-459                                                                 | 1529                            | 4349-5846                                                               |

**Table S19:** Cloth-air partition coefficients as  $\log(K_{ca})$  for six neutral PFAS (3 months, 6 months, and overall average)

| Home ID        | Time  | 6:2 FTOH | 8:2 FTOH | 10:2 FTOH | EtFOSA | MeFOSE | EtFOSE |
|----------------|-------|----------|----------|-----------|--------|--------|--------|
| 65             | t=3mo | 4.16     | -        | -         | -      | 6.46   | 6.80   |
| 18             | t=3mo | 4.36     | -        | -         | -      | 6.47   | 6.72   |
| 78             | t=3mo | 3.98     | 5.02     | 5.69      | -      | 6.47   | 6.43   |
| 30             | t=3mo | 4.95     | -        | -         | -      | 6.63   | 6.73   |
| 50             | t=3mo | 5.30     | -        | -         | -      | 6.77   | 6.95   |
| 43             | t=3mo | 4.41     | -        | -         | -      | 6.50   | 6.54   |
| 35             | t=3mo | 4.37     | 5.05     | 5.51      | 5.69   | 6.17   | 6.16   |
| 10             | t=3mo | 3.91     | 4.52     | 5.21      | 5.11   | 6.70   | 6.47   |
| 59             | t=3mo | 4.39     | 4.59     | 5.18      | 5.06   | 6.45   | 6.01   |
| 01             | t=3mo | -        | -        | -         | -      | -      | -      |
| 65             | t=6mo | 4.19     | 4.70     | 5.42      | -      | 6.39   | 6.17   |
| 18             | t=6mo | 5.05     | 5.18     | 5.62      | 5.12   | 6.94   | 6.88   |
| 78             | t=6mo | 5.11     | 5.29     | 6.07      | -      | 6.61   | 5.38   |
| 30             | t=6mo | 5.41     | -        | 4.96      | -      | -      | -      |
| 50             | t=6mo | 5.92     | 5.51     | 5.78      | 5.23   | 7.06   | 7.24   |
| 43             | t=6mo | 4.06     | 4.84     | 5.36      | -      | 6.48   | 6.36   |
| 35             | t=6mo | 4.78     | 4.22     | 4.58      | 6.01   | 7.71   | 7.69   |
| 10             | t=6mo | 4.16     | 4.42     | 4.66      | 6.14   | 6.76   | 7.62   |
| 59             | t=6mo | 5.09     | 3.93     | 4.27      | 7.70   | 6.58   | 6.65   |
| 01             | t=6mo | 4.80     | 3.72     | 4.37      | -      | 6.57   | 6.62   |
| <b>median</b>  |       | 4.41     | 4.70     | 5.28      | 5.46   | 6.58   | 6.63   |
| <b>mean</b>    |       | 4.65     | 4.69     | 5.19      | 5.76   | 6.65   | 6.63   |
| <b>std dev</b> |       | 0.55     | 0.51     | 0.53      | 0.84   | 0.33   | 0.54   |

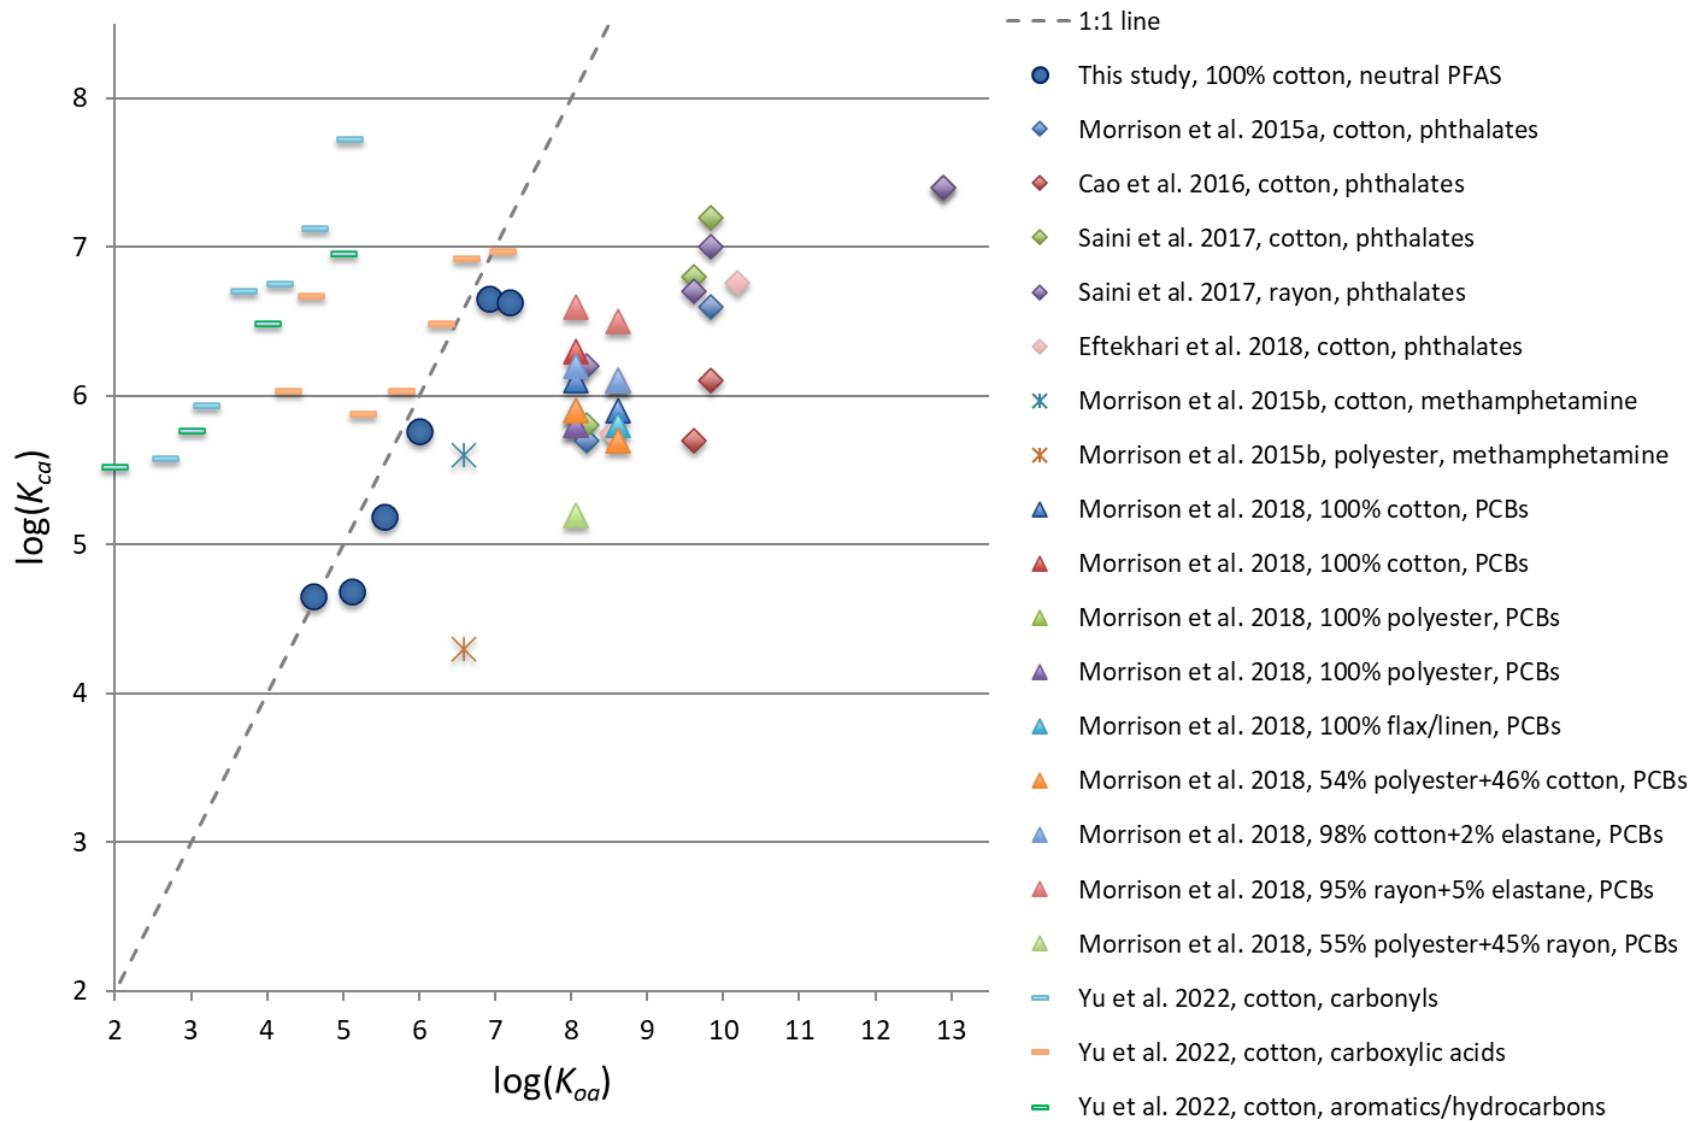

Figure S10:  $\log(K_{ca})$  of PFAS and different SVOCs over  $\log(K_{oa})$ .<sup>30-36</sup> Adapted from Morrison et al. 2018 (SI)<sup>35</sup>.

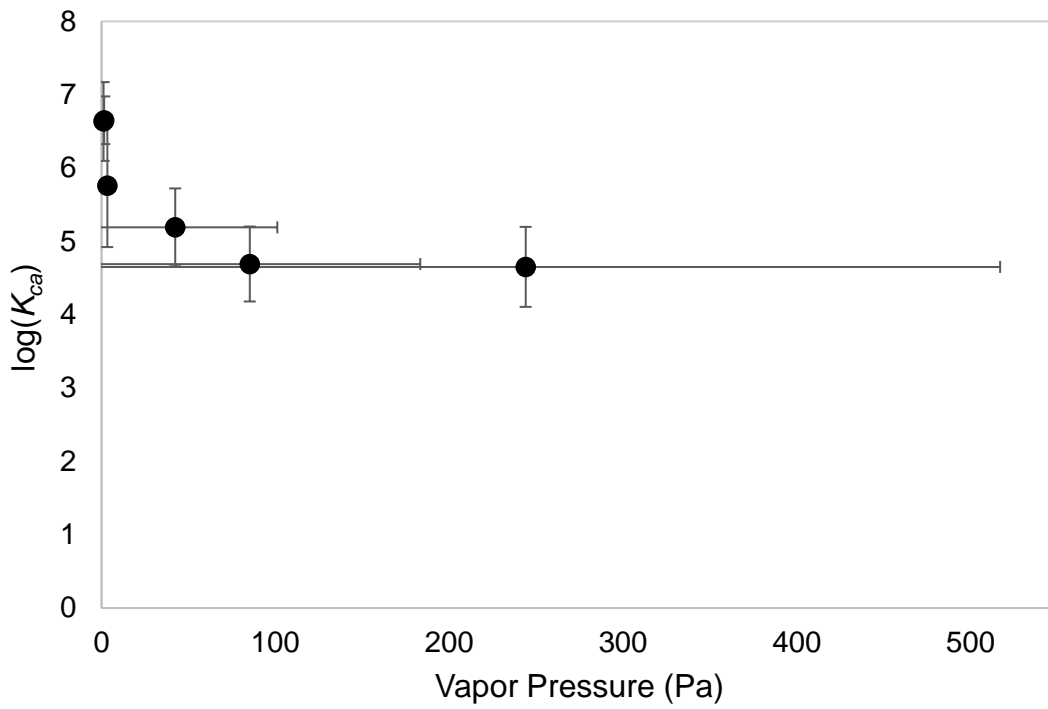

**Figure S11:** log( $K_{ca}$ ) and vapor pressure (means and standard deviations, see **Table S4**).



## Section S7: Temperature-dependence of $\log(K_{ca})$

Eftekhari et al.<sup>33</sup> investigated cloth-air partitioning of two phthalates, diethyl phthalate (DEP) and di-n-butyl phthalate (DnBP), to cotton cloth at varying temperatures and observed a decrease of  $K_{ca}$  with increasing temperature. For example,  $K_{ca}$  (reported as  $K_{vol}$ ) of DnBP decreased from 570,000 at 20°C to 50,000 at 40°C.<sup>33</sup> This indicates that at higher temperatures, a larger fraction of the compound is in the air, while at lower temperatures, more of the compound partitions to the cloth. We used several averaging times for the temperatures in the analysis, acknowledging that there are differences between species in the times to cloth-air equilibration (**Table S18**): 24-hour, 3-day, or 1-month average prior to sampling. Although the temperature range measured in the IPA Campaign homes is narrower than the range used in the experiments by Eftekhari et al.<sup>33</sup> and correlations are modest, the same trend can be observed for most neutral PFAS (**Figure S12**). Similar to Eftekhari et al.<sup>33</sup>,  $\log(K_{ca})$  decreases with increasing temperature for the FTOHs and FOSEs for all temperature averages. In contrast, for EtFOSA,  $\log(K_{ca})$  increases with increasing temperature (**Figure S12C**). This may hint at a different type of source for EtFOSA compared to the FTOHs and FOSEs. For 6:2 FTOH, the coefficient of determination ( $R^2$ ) is highest for the correlation between  $\log(K_{ca})$  and the 1-month average temperature. For 8:2 FTOH and especially for 10:2 FTOH,  $R^2$  is highest for  $\log(K_{ca})$  and the 3-day average temperature, and for the FOSEs and EtFOSA,  $R^2$  is highest for  $\log(K_{ca})$  and the 24-hour average temperature. In general, the FOSEs showed the strongest correlation with temperature, with coefficients of determination ( $R^2$ ) of 0.54 and 0.22 for MeFOSE and EtFOSE, respectively, which were also found to be significant ( $\alpha = 0.05$ ). **Figure S13** further shows the relationship between  $\log(K_{ca})$  and the reciprocal absolute temperature, which can be described by the Van 't Hoff relationship.

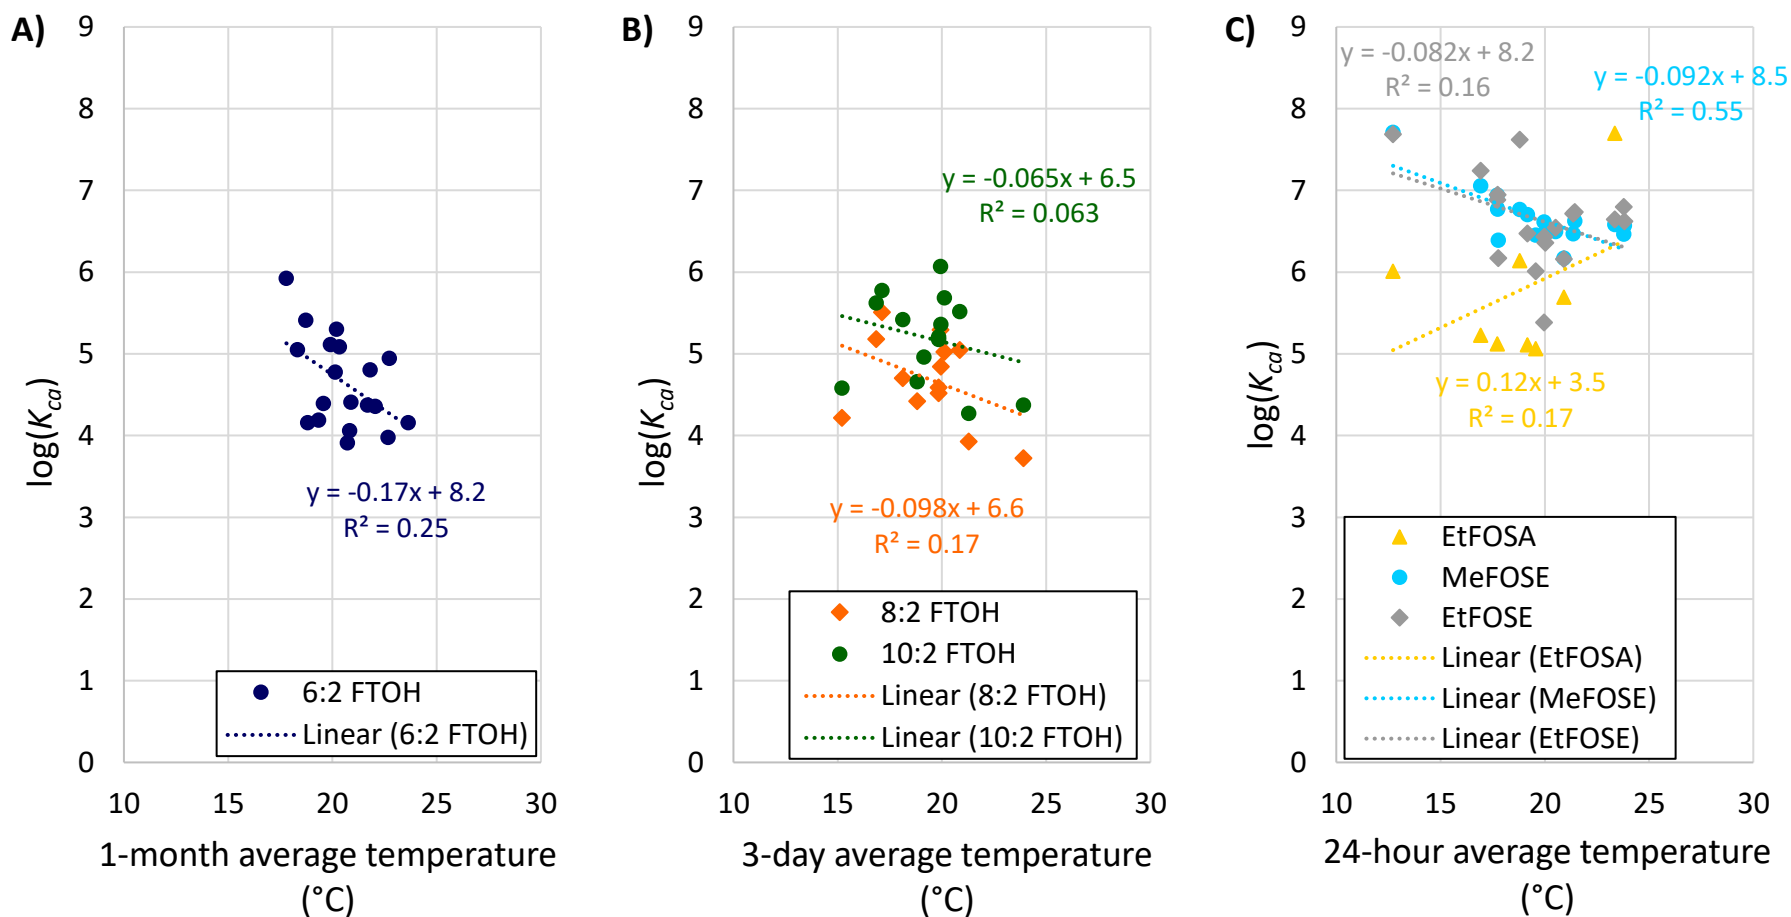

**Figure S12:** The equilibrium cloth-air partition coefficient  $\log(K_{ca})$  and average temperature (1-month, 3-day and 24-hour averages) for A) 6:2 FTOH, B) 8:2 FTOH and 10:2 FTOH, and C) EtFOFA, MeFOSE, and EtFOSE.

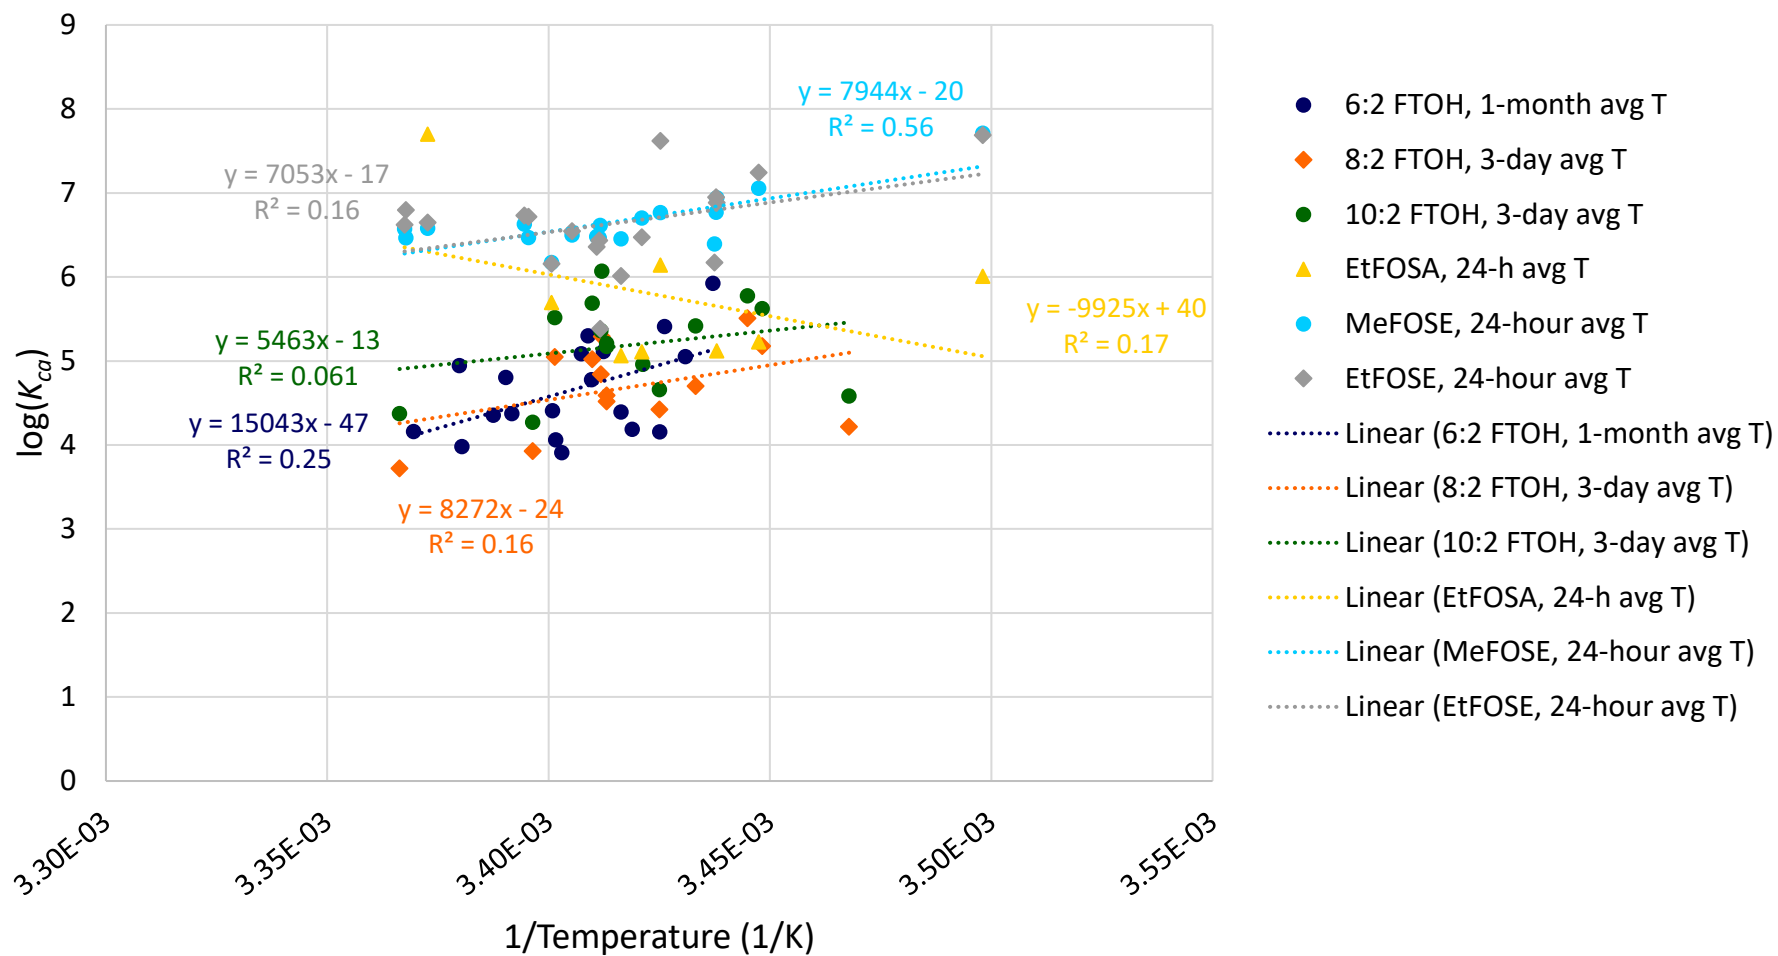

**Figure S13:** The equilibrium cloth-air partition coefficient  $\log(K_{ca})$  and the reciprocal absolute temperature (1-month, 3-day and 24-hour averages) for 6:2 FTOH, 8:2 FTOH, 10:2 FTOH, EtFOSA, MeFOSE, and EtFOSE.

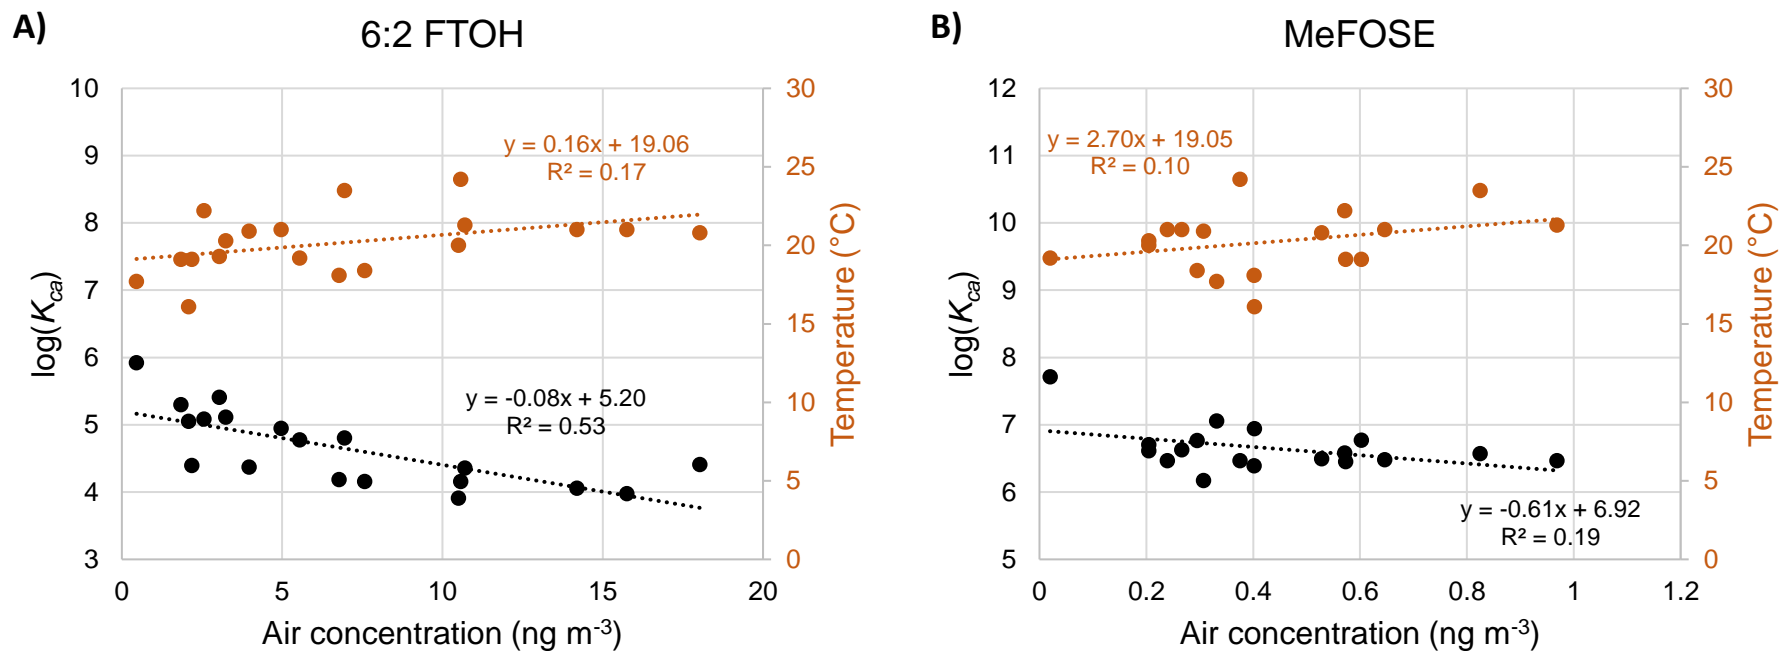

**Figure S14:** Examples of the relationship between  $\log(K_{ca})$  and the air concentration of A) 6:2 FTOH and B) MeFOSE in comparison to the average temperature during air sampling (°C) vs. the respective air concentration. The observed correlation of  $\log(K_{ca})$  with the air concentrations can be explained by the dependence of both the air concentration and  $\log(K_{ca})$  of the temperature. Higher temperatures result in smaller partition coefficients and higher air concentrations, as partitioning is shifted to the gas phase.

**Table S20:** Neutral PFAS in folded cloth piece samples (Sampler B). N = 91 samples, including 18 duplicates. “nd” = not detected. Results >MDL are printed in bold. For calculation of means and standard deviations, nd was replaced by 0

| Duration of deployment (days) | Home ID | Sample ID | Folded Cloth Piece Concentration (ng cm <sup>-2</sup> ) |              |              |          |           |              |        |              |              |    |
|-------------------------------|---------|-----------|---------------------------------------------------------|--------------|--------------|----------|-----------|--------------|--------|--------------|--------------|----|
|                               |         |           | 6:2 FTOH                                                | 8:2 FTOH     | 10:2 FTOH    | 8:2 FTAC | 10:2 FTAC | EtFOSA       | MeFOSA | MeFOSE       | EtFOSE       |    |
| 0                             | 65      | A         | 0.014                                                   | <b>0.016</b> | nd           | nd       | nd        | nd           | nd     | nd           | nd           | nd |
| 1                             | 65      | A         | 0.022                                                   | <b>0.018</b> | <b>0.020</b> | nd       | nd        | 2.6E-04      | nd     | <b>0.021</b> | 2.8E-04      |    |
| 6                             | 65      | A         | 0.024                                                   | <b>0.015</b> | <b>0.018</b> | nd       | nd        | nd           | nd     | <b>0.019</b> | nd           |    |
| 31                            | 65      | A         | 0.057                                                   | <b>0.017</b> | <b>0.020</b> | nd       | nd        | 2.9E-04      | nd     | <b>0.033</b> | <b>0.020</b> |    |
| 91                            | 65      | A         | 0.025                                                   | <b>0.015</b> | <b>0.017</b> | nd       | nd        | 3.7E-04      | nd     | <b>0.026</b> | 3.5E-04      |    |
| 188                           | 65      | A         | 0.025                                                   | <b>0.016</b> | <b>0.018</b> | nd       | nd        | 1.7E-04      | nd     | <b>0.047</b> | <b>0.022</b> |    |
| 273                           | 65      | A         | 0.047                                                   | 0.002        | 0.013        | nd       | nd        | nd           | nd     | <b>0.015</b> | 0.001        |    |
| 0                             | 18      | A         | 0.028                                                   | <b>0.027</b> | nd           | nd       | nd        | nd           | nd     | 0.010        | 3.2E-04      |    |
| 0                             | 18      | B         | 0.012                                                   | nd           | nd           | nd       | nd        | 0.003        | nd     | <b>0.020</b> | 0.001        |    |
| 1                             | 18      | A         | 0.024                                                   | 0.002        | 0.014        | nd       | nd        | nd           | nd     | <b>0.016</b> | <b>0.009</b> |    |
| 1                             | 18      | B         | 0.013                                                   | 0.003        | <b>0.023</b> | nd       | nd        | <b>0.007</b> | nd     | <b>0.037</b> | 0.001        |    |
| 6                             | 18      | A         | 0.027                                                   | 0.002        | 0.016        | nd       | nd        | 0            | nd     | <b>0.026</b> | <b>0.011</b> |    |
| 6                             | 18      | B         | 0.018                                                   | 0.003        | <b>0.023</b> | nd       | nd        | <b>0.007</b> | nd     | <b>0.037</b> | <b>0.023</b> |    |
| 31                            | 18      | A         | 0.010                                                   | nd           | <b>0.016</b> | nd       | nd        | 0.002        | nd     | <b>0.069</b> | <b>0.016</b> |    |
| 31                            | 18      | B         | 0.023                                                   | 0.003        | <b>0.027</b> | nd       | nd        | <b>0.011</b> | nd     | <b>0.123</b> | <b>0.038</b> |    |
| 91                            | 18      | A         | 0.046                                                   | 0.002        | 0.013        | nd       | nd        | nd           | nd     | <b>0.071</b> | <b>0.015</b> |    |
| 91                            | 18      | B         | 0.034                                                   | 0.004        | <b>0.029</b> | nd       | nd        | <b>0.015</b> | nd     | <b>0.096</b> | <b>0.035</b> |    |
| 182                           | 18      | A         | 0.059                                                   | <b>0.018</b> | <b>0.018</b> | nd       | nd        | nd           | nd     | <b>0.083</b> | <b>0.016</b> |    |
| 182                           | 18      | B         | 0.024                                                   | 0.003        | <b>0.025</b> | nd       | nd        | <b>0.009</b> | nd     | <b>0.126</b> | <b>0.036</b> |    |
| 276                           | 18      | A         | 0.033                                                   | <b>0.015</b> | 0.015        | nd       | nd        | 0            | nd     | <b>0.141</b> | <b>0.031</b> |    |
| 276                           | 18      | B         | 0.028                                                   | 0.002        | <b>0.020</b> | nd       | nd        | 0.003        | nd     | <b>0.114</b> | <b>0.031</b> |    |
| 0                             | 78      | A         | 0.074                                                   | nd           | nd           | nd       | nd        | nd           | nd     | nd           | nd           |    |
| NA                            | 78      | NA        | NA                                                      | NA           | NA           | NA       | NA        | NA           | NA     | NA           | NA           |    |
| NA                            | 78      | NA        | NA                                                      | NA           | NA           | NA       | NA        | NA           | NA     | NA           | NA           |    |
| 6                             | 78      | A         | 0.065                                                   | <b>0.013</b> | 0.010        | nd       | nd        | nd           | nd     | 0.003        | nd           |    |
| 31                            | 78      | A         | 0.042                                                   | 0.004        | 0.002        | nd       | nd        | nd           | nd     | 0.003        | nd           |    |
| 91                            | 78      | A         | 0.055                                                   | 0.003        | 0.008        | nd       | nd        | nd           | nd     | 0.003        | nd           |    |
| 182                           | 78      | A         | 0.041                                                   | 0.002        | 0.002        | nd       | nd        | nd           | nd     | 0.002        | nd           |    |
| 228                           | 78      | A         | 0.067                                                   | 0.002        | 0.011        | nd       | nd        | nd           | nd     | 1.3E-04      | 1.3E-04      |    |
| 0                             | 30      | A         | 0.022                                                   | nd           | 0.002        | nd       | nd        | 2.7E-04      | nd     | 3.3E-04      | 3.3E-04      |    |
| 1                             | 30      | A         | 0.034                                                   | <b>0.025</b> | <b>0.024</b> | nd       | nd        | 0.001        | nd     | <b>0.028</b> | 0.001        |    |
| 6                             | 30      | A         | 0.035                                                   | <b>0.021</b> | <b>0.025</b> | nd       | nd        | 0.001        | nd     | <b>0.044</b> | <b>0.029</b> |    |
| 31                            | 30      | A         | nd                                                      | <b>0.014</b> | <b>0.019</b> | nd       | nd        | nd           | nd     | <b>0.052</b> | <b>0.028</b> |    |
| 91                            | 30      | A         | 0.014                                                   | 0.002        | 0.002        | nd       | nd        | 4.3E-04      | nd     | <b>0.051</b> | <b>0.024</b> |    |

|     |    |   |              |              |              |    |    |              |    |              |              |
|-----|----|---|--------------|--------------|--------------|----|----|--------------|----|--------------|--------------|
| 196 | 30 | A | 0.050        | 0.002        | 0.002        | nd | nd | 0.001        | nd | <b>0.062</b> | <b>0.022</b> |
| 202 | 30 | A | <b>0.241</b> | <b>0.017</b> | <b>0.019</b> | nd | nd | nd           | nd | <b>0.065</b> | <b>0.035</b> |
| 0   | 50 | A | 0.009        | nd           | nd           | nd | nd | 0.001        | nd | 0.001        | 0.001        |
| 1   | 50 | A | 0.018        | 0.002        | 0.002        | nd | nd | 4.3E-04      | nd | <b>0.029</b> | <b>0.026</b> |
| 6   | 50 | A | 0.014        | 0.002        | 0.002        | nd | nd | <b>0.018</b> | nd | <b>0.076</b> | <b>0.049</b> |
| 31  | 50 | A | 0.014        | 0.002        | 0.002        | nd | nd | nd           | nd | <b>0.061</b> | <b>0.050</b> |
| 91  | 50 | A | 0.020        | 0.002        | 0.003        | nd | nd | 0.001        | nd | <b>0.070</b> | <b>0.068</b> |
| 175 | 50 | A | 0.017        | 0.003        | 0.003        | nd | nd | 0.001        | nd | <b>0.075</b> | <b>0.070</b> |
| 273 | 50 | A | 0.037        | 0.002        | 0.013        | nd | nd | nd           | nd | <b>0.057</b> | <b>0.046</b> |
| 0   | 43 | A | 0.010        | nd           | nd           | nd | nd | 3.0E-04      | nd | 4.1E-04      | 4.1E-04      |
| 3   | 43 | A | 0.018        | 0.003        | 0.003        | nd | nd | 4.8E-04      | nd | <b>0.027</b> | 0.001        |
| 6   | 43 | A | 0.018        | 0.003        | 0.002        | nd | nd | 1.4E-04      | nd | <b>0.026</b> | <b>0.022</b> |
| 31  | 43 | A | 0.015        | 0.000        | 0.002        | nd | nd | 1.6E-04      | nd | <b>0.035</b> | <b>0.025</b> |
| 91  | 43 | A | 0.017        | 0.002        | 0.002        | nd | nd | 3.9E-04      | nd | <b>0.035</b> | <b>0.027</b> |
| 182 | 43 | A | 0.013        | 0.002        | 0.002        | nd | nd | <b>0.014</b> | nd | <b>0.037</b> | <b>0.027</b> |
| 266 | 43 | A | 0.054        | 0.004        | 0.003        | nd | nd | nd           | nd | <b>0.024</b> | <b>0.017</b> |
| 266 | 43 | B | 0.030        | 0.002        | 0.002        | nd | nd | 0.001        | nd | <b>0.015</b> | <b>0.009</b> |
| 0   | 35 | A | 0.009        | nd           | nd           | nd | nd | 0.001        | nd | 5.0E-04      | 5.0E-04      |
| 1   | 35 | A | 0.013        | 0.002        | <b>0.029</b> | nd | nd | 0.001        | nd | 4.9E-04      | 4.9E-04      |
| 6   | 35 | A | 0.013        | 0.002        | <b>0.027</b> | nd | nd | 0.001        | nd | 0.011        | 4.7E-04      |
| 31  | 35 | A | 0.013        | 0.002        | <b>0.024</b> | nd | nd | 1.7E-04      | nd | 0.011        | <b>0.004</b> |
| 98  | 35 | A | 0.017        | 0.002        | <b>0.029</b> | nd | nd | 4.1E-04      | nd | <b>0.016</b> | <b>0.006</b> |
| 182 | 35 | A | 0.013        | 0.002        | <b>0.025</b> | nd | nd | nd           | nd | <b>0.013</b> | <b>0.006</b> |
| 220 | 35 | A | 0.060        | 0.002        | 0.009        | nd | nd | nd           | nd | <b>0.015</b> | <b>0.009</b> |
| 220 | 35 | B | 0.019        | 0.002        | 0.002        | nd | nd | 0.001        | nd | <b>0.013</b> | <b>0.006</b> |
| 0   | 10 | A | 0.025        | 0.007        | 0.009        | nd | nd | nd           | nd | 0.001        | 0.001        |
| 0   | 10 | B | 0.012        | nd           | nd           | nd | nd | 0.003        | nd | 4.7E-04      | 4.7E-04      |
| 1   | 10 | A | 0.043        | 0.003        | <b>0.017</b> | nd | nd | nd           | nd | 0.001        | 0.001        |
| 1   | 10 | B | 0.015        | 0.003        | <b>0.021</b> | nd | nd | 0.005        | nd | <b>0.029</b> | <b>0.029</b> |
| 6   | 10 | A | 0.040        | 0.003        | <b>0.017</b> | nd | nd | nd           | nd | <b>0.048</b> | <b>0.071</b> |
| 6   | 10 | B | 0.025        | 0.003        | <b>0.026</b> | nd | nd | <b>0.009</b> | nd | <b>0.037</b> | <b>0.031</b> |
| 31  | 10 | A | 0.039        | 0.003        | 0.003        | nd | nd | nd           | nd | <b>0.041</b> | <b>0.051</b> |
| 31  | 10 | B | 0.037        | 0.004        | nd           | nd | nd | <b>0.011</b> | nd | <b>0.051</b> | <b>0.063</b> |
| 91  | 10 | A | 0.035        | 0.004        | 0.003        | nd | nd | nd           | nd | <b>0.029</b> | <b>0.027</b> |
| 91  | 10 | B | 0.023        | 0.004        | nd           | nd | nd | <b>0.012</b> | nd | <b>0.063</b> | <b>0.087</b> |
| 175 | 10 | A | 0.041        | 0.003        | 0.003        | nd | nd | nd           | nd | <b>0.048</b> | <b>0.072</b> |
| 175 | 10 | B | 0.023        | nd           | nd           | nd | nd | 0.004        | nd | <b>0.051</b> | <b>0.077</b> |
| 254 | 10 | A | 0.032        | 0.004        | 0.004        | nd | nd | nd           | nd | <b>0.033</b> | <b>0.042</b> |
| 254 | 10 | B | 0.021        | nd           | nd           | nd | nd | 0.005        | nd | <b>0.035</b> | <b>0.046</b> |
| 0   | 59 | A | 0.009        | nd           | nd           | nd | nd | 1.4E-04      | nd | 1.6E-04      | 1.6E-04      |

|     |    |                             |       |              |              |       |       |              |       |              |              |
|-----|----|-----------------------------|-------|--------------|--------------|-------|-------|--------------|-------|--------------|--------------|
| 1   | 59 | A                           | 0.016 | 0.002        | <b>0.028</b> | nd    | nd    | 1.9E-04      | nd    | 0.007        | 1.8E-04      |
| 6   | 59 | A                           | 0.018 | 0.003        | <b>0.038</b> | nd    | nd    | 0.001        | nd    | <b>0.018</b> | <b>0.006</b> |
| 30  | 59 | A                           | nd    | 0.002        | <b>0.032</b> | nd    | nd    | 4.6E-04      | nd    | <b>0.035</b> | <b>0.009</b> |
| 91  | 59 | A                           | 0.020 | 0.002        | <b>0.032</b> | nd    | nd    | 0.001        | nd    | <b>0.030</b> | <b>0.009</b> |
| 175 | 59 | A                           | 0.018 | 0.002        | <b>0.027</b> | nd    | nd    | 2.1E-04      | nd    | <b>0.039</b> | <b>0.011</b> |
| 244 | 59 | A                           | 0.032 | <b>0.016</b> | <b>0.018</b> | nd    | nd    | nd           | nd    | <b>0.058</b> | <b>0.023</b> |
| 0   | 01 | A                           | 0.016 | nd           | nd           | nd    | nd    | 0.001        | nd    | 0.002        | 0.002        |
| 1   | 01 | A                           | 0.022 | <b>0.140</b> | <b>0.155</b> | nd    | nd    | 0.001        | nd    | <b>0.012</b> | 0.002        |
| 6   | 01 | A                           | 0.048 | <b>0.162</b> | <b>0.194</b> | nd    | nd    | 0.001        | nd    | <b>0.016</b> | <b>0.007</b> |
| 6   | 01 | B                           | 0.016 | <b>0.151</b> | <b>0.187</b> | nd    | nd    | 0.002        | nd    | <b>0.020</b> | <b>0.007</b> |
| 31  | 01 | A                           | 0.007 | <b>0.434</b> | <b>0.616</b> | nd    | nd    | 0.001        | nd    | <b>0.026</b> | <b>0.012</b> |
| 84  | 01 | A                           | 0.018 | <b>0.366</b> | <b>0.414</b> | 0.003 | nd    | 0.001        | nd    | <b>0.029</b> | <b>0.014</b> |
| 175 | 01 | A                           | 0.021 | <b>0.116</b> | <b>0.120</b> | nd    | nd    | 0.001        | nd    | <b>0.044</b> | <b>0.015</b> |
| 200 | 01 | A                           | 0.020 | <b>0.526</b> | <b>0.647</b> | 0.003 | nd    | 0.001        | nd    | <b>0.043</b> | <b>0.017</b> |
| 200 | 01 | B                           | 0.024 | <b>0.039</b> | <b>0.059</b> | nd    | nd    | <b>0.019</b> | nd    | <b>0.028</b> | <b>0.012</b> |
| 0   | 82 | A                           | 0.077 | nd           | nd           | nd    | nd    | nd           | nd    | 0.002        | nd           |
| 1   | 82 | A                           | nd    | 0.007        | 0.012        | nd    | nd    | 0.002        | nd    | <b>0.053</b> | <b>0.007</b> |
| 6   | 82 | A                           | 0.086 | 0.007        | 0.010        | nd    | nd    | nd           | nd    | <b>0.053</b> | 0.003        |
| 32  | 82 | A                           | 0.030 | 0.006        | 0.010        | nd    | nd    | nd           | nd    | <b>0.241</b> | <b>0.009</b> |
| NA  | 82 | NA                          | NA    | NA           | NA           | NA    | NA    | NA           | NA    | NA           | NA           |
| NA  | 82 | NA                          | NA    | NA           | NA           | NA    | NA    | NA           | NA    | NA           | NA           |
| NA  | 82 | NA                          | NA    | NA           | NA           | NA    | NA    | NA           | NA    | NA           | NA           |
| NA  | 82 | NA                          | NA    | NA           | NA           | NA    | NA    | NA           | NA    | NA           | NA           |
| NA  | 82 | NA                          | NA    | NA           | NA           | NA    | NA    | NA           | NA    | NA           | NA           |
| NA  | 82 | NA                          | NA    | NA           | NA           | NA    | NA    | NA           | NA    | NA           | NA           |
| NA  | 82 | NA                          | NA    | NA           | NA           | NA    | NA    | NA           | NA    | NA           | NA           |
|     |    | <b>MDL</b>                  | 0.112 | 0.010        | 0.016        | 0.005 | 0.006 | 0.007        | 0.007 | 0.012        | 0.003        |
|     |    | <b># detect &gt;MDL</b>     | 1     | 23           | 40           | 0     | 0     | 11           | 0     | 69           | 60           |
|     |    | <b>% detect &gt;MDL</b>     | 1%    | 16%          | 27%          | 0%    | 0%    | 8%           | 0%    | 47%          | 41%          |
|     |    | <b>median (all samples)</b> | 0.023 | 0.003        | 0.013        | nd    | nd    | nd           | nd    | 0.029        | 0.011        |
|     |    | <b>mean (all samples)</b>   | 0.030 | 0.026        | 0.037        | 0.000 | 0.000 | 0.002        | 0.000 | 0.036        | 0.018        |
|     |    | <b>min (all samples)</b>    | nd    | nd           | nd           | nd    | nd    | nd           | nd    | nd           | nd           |
|     |    | <b>max (all samples)</b>    | 0.241 | 0.526        | 0.647        | 0.003 | nd    | 0.019        | nd    | 0.241        | 0.087        |

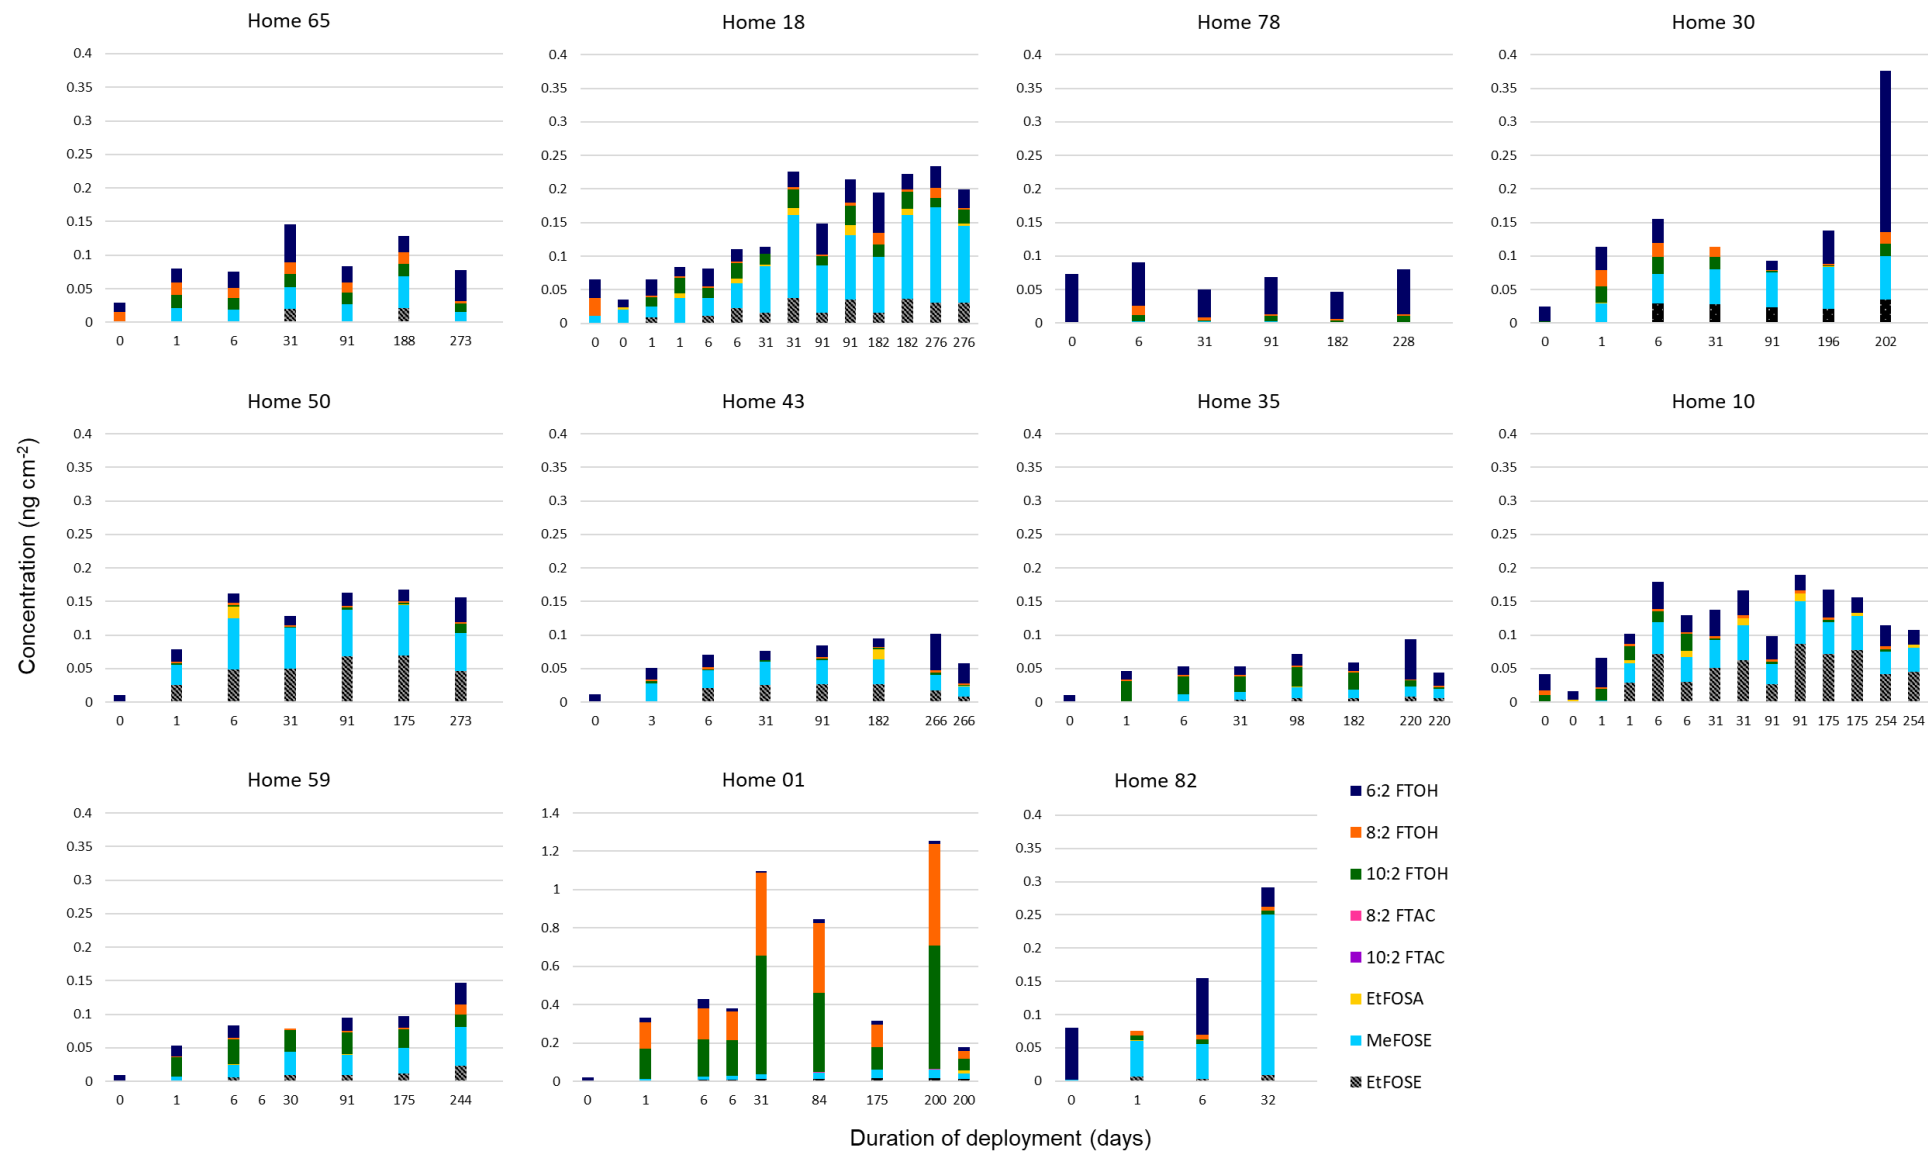

**Figure S15:** Concentration profiles of neutral PFAS in folded cloth pieces (Sampler B) over the duration of deployment at the IPA Campaign homes. Note that the y-axis scale for Home 01 is different from those of the other homes. MeFOSA was not detected in any samples and is therefore not shown.



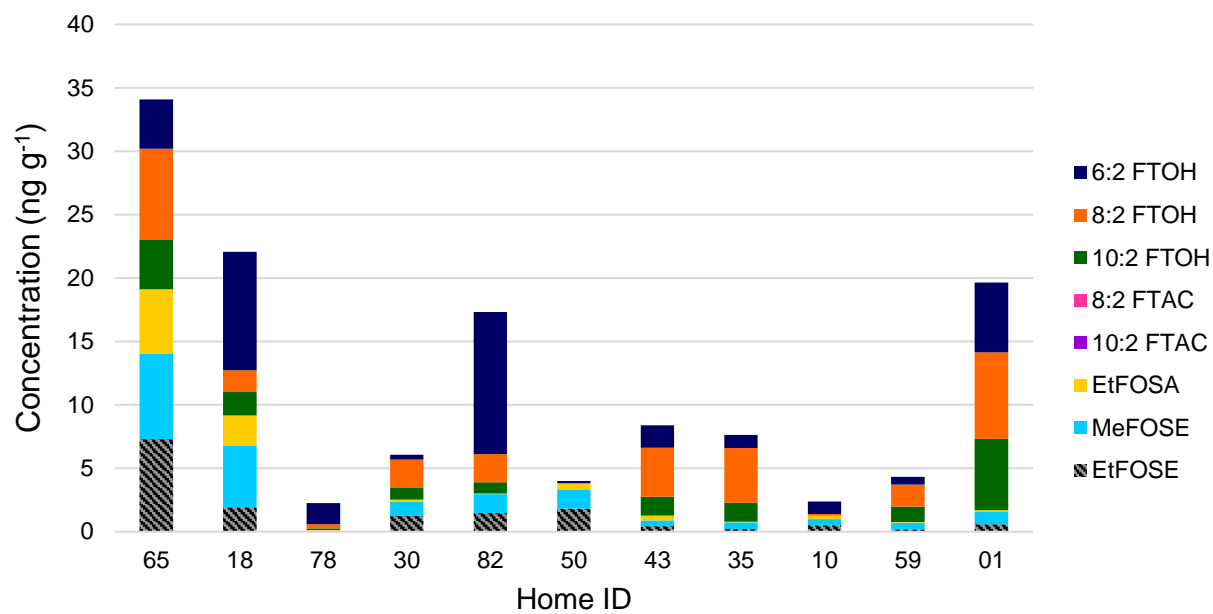

**Figure S16:** Mass-based concentration profiles of neutral PFAS in cotton clothing from the IPA Campaign homes. MeFOSA was not detected in any samples and is therefore not shown.

**Table S21:** Mass-based concentrations of neutral PFAS in household cotton clothing items. \* indicates 6:2 FTOH concentrations that are not recovery corrected. “nd” = not detected. Results >MDL are printed in bold. For calculation of means and standard deviations, nd was replaced by 0

| Home ID                     | Household Clothing Concentration (ng g <sup>-1</sup> ) |            |             |          |           |            |        |             |             |
|-----------------------------|--------------------------------------------------------|------------|-------------|----------|-----------|------------|--------|-------------|-------------|
|                             | 6:2 FTOH                                               | 8:2 FTOH   | 10:2 FTOH   | 8:2 FTAC | 10:2 FTAC | EtFOSA     | MeFOSA | MeFOSE      | EtFOSE      |
| 65                          | <b>3.9*</b>                                            | <b>7.2</b> | <b>3.9</b>  | nd       | nd        | <b>5.1</b> | nd     | <b>6.7</b>  | <b>7.3</b>  |
| 18                          | <b>9.3</b>                                             | <b>1.7</b> | <b>1.8</b>  | nd       | nd        | <b>2.4</b> | nd     | <b>4.8</b>  | <b>1.9</b>  |
| 78                          | <b>1.7*</b>                                            | 0.32       | 0.12        | nd       | nd        | 0.048      | nd     | 0.047       | 0.047       |
| 30                          | <b>0.37*</b>                                           | <b>2.2</b> | <b>0.98</b> | nd       | nd        | 0.13       | nd     | <b>1.1</b>  | <b>1.2</b>  |
| 82                          | <b>11.2</b>                                            | <b>2.2</b> | <b>0.89</b> | nd       | nd        | 0.059      | nd     | <b>1.5</b>  | <b>1.5</b>  |
| 50                          | 0.19*                                                  | nd         | nd          | nd       | nd        | 0.48       | nd     | <b>1.5</b>  | <b>1.8</b>  |
| 43                          | <b>1.8*</b>                                            | <b>3.9</b> | <b>1.5</b>  | nd       | nd        | 0.38       | nd     | <b>0.45</b> | <b>0.43</b> |
| 35                          | <b>1.0</b>                                             | <b>4.3</b> | <b>1.5</b>  | nd       | nd        | 0.070      | nd     | <b>0.51</b> | <b>0.22</b> |
| 10                          | <b>0.98</b>                                            | 0.12       | nd          | nd       | nd        | 0.29       | nd     | <b>0.49</b> | <b>0.50</b> |
| 59                          | <b>0.61*</b>                                           | <b>1.7</b> | <b>1.2</b>  | nd       | nd        | 0.056      | nd     | <b>0.52</b> | <b>0.20</b> |
| 01                          | <b>5.5</b>                                             | <b>6.8</b> | <b>5.6</b>  | nd       | nd        | 0.087      | nd     | <b>1.0</b>  | <b>0.60</b> |
| <b>MDL</b>                  | 0.36                                                   | 0.47       | 0.53        | 0.42     | 0.47      | 0.54       | 0.58   | 0.13        | 0.13        |
| <b># detect &gt;MDL</b>     | 10                                                     | 8          | 8           | 0        | 0         | 2          | 0      | 10          | 10          |
| <b>% detect &gt;MDL</b>     | 91%                                                    | 73%        | 73%         | 0%       | 0%        | 18%        | 0%     | 91%         | 91%         |
| <b>median (all samples)</b> | 1.668                                                  | 2.195      | 1.213       | nd       | nd        | 0.130      | nd     | 1.004       | 0.601       |
| <b>mean (all samples)</b>   | 3.319                                                  | 2.775      | 1.594       | 0.000    | 0.000     | 0.827      | 0.000  | 1.701       | 1.437       |
| <b>min (all samples)</b>    | 0.192                                                  | nd         | nd          | nd       | nd        | 0.048      | nd     | 0.047       | 0.047       |
| <b>max (all samples)</b>    | 11.205                                                 | 7.195      | 5.643       | nd       | nd        | 5.096      | nd     | 6.724       | 7.308       |

**Table S22:** Area-based concentrations of neutral PFAS in household cotton clothing items. \* indicates 6:2 FTOH concentrations that are not recovery corrected. “nd” = not detected. Results >MDL are printed in bold. For calculation of means and standard deviations, nd was replaced by 0

| Home ID                     | Household Clothing Concentration (ng cm <sup>-2</sup> ) |              |              |          |           |              |        |              |              |
|-----------------------------|---------------------------------------------------------|--------------|--------------|----------|-----------|--------------|--------|--------------|--------------|
|                             | 6:2 FTOH                                                | 8:2 FTOH     | 10:2 FTOH    | 8:2 FTAC | 10:2 FTAC | EtFOSA       | MeFOSA | MeFOSE       | EtFOSE       |
| 65                          | <b>0.045*</b>                                           | <b>0.084</b> | <b>0.045</b> | nd       | nd        | <b>0.060</b> | nd     | <b>0.079</b> | <b>0.085</b> |
| 18                          | <b>0.179</b>                                            | <b>0.033</b> | <b>0.035</b> | nd       | nd        | <b>0.046</b> | nd     | <b>0.093</b> | <b>0.037</b> |
| 78                          | <b>0.029*</b>                                           | <b>0.006</b> | 0.002        | nd       | nd        | 0.001        | nd     | 0.001        | 0.001        |
| 30                          | <b>0.008*</b>                                           | <b>0.046</b> | <b>0.020</b> | nd       | nd        | 0.003        | nd     | <b>0.024</b> | <b>0.026</b> |
| 82                          | <b>0.244</b>                                            | <b>0.049</b> | <b>0.019</b> | nd       | nd        | 0.001        | nd     | <b>0.032</b> | <b>0.032</b> |
| 50                          | 0.002                                                   | nd           | nd           | nd       | nd        | <b>0.006</b> | nd     | <b>0.018</b> | <b>0.022</b> |
| 43                          | <b>0.032*</b>                                           | <b>0.071</b> | <b>0.027</b> | nd       | nd        | <b>0.007</b> | nd     | <b>0.008</b> | <b>0.008</b> |
| 35                          | <b>0.016</b>                                            | <b>0.070</b> | <b>0.024</b> | nd       | nd        | 0.001        | nd     | <b>0.008</b> | <b>0.003</b> |
| 10                          | <b>0.017</b>                                            | 0.002        | nd           | nd       | nd        | 0.005        | nd     | <b>0.008</b> | <b>0.009</b> |
| 59                          | <b>0.019*</b>                                           | <b>0.054</b> | <b>0.038</b> | nd       | nd        | 0.002        | nd     | <b>0.016</b> | <b>0.006</b> |
| 01                          | <b>0.256</b>                                            | <b>0.318</b> | <b>0.263</b> | nd       | nd        | 0.004        | nd     | <b>0.047</b> | <b>0.028</b> |
| <b>MDL</b>                  | 0.003                                                   | 0.004        | 0.005        | 0.004    | 0.005     | 0.005        | 0.006  | 0.001        | 0.001        |
| <b># detect &gt;MDL</b>     | 10                                                      | 9            | 8            | 0        | 0         | 4            | 0      | 10           | 10           |
| <b>% detect &gt;MDL</b>     | 91%                                                     | 82%          | 73%          | 0%       | 0%        | 36%          | 0%     | 91%          | 91%          |
| <b>median (all samples)</b> | 0.029                                                   | 0.049        | 0.024        | nd       | nd        | 0.004        | nd     | 0.018        | 0.022        |
| <b>mean (all samples)</b>   | 0.077                                                   | 0.066        | 0.043        | 0.000    | 0.000     | 0.012        | nd     | 0.030        | 0.023        |
| <b>min (all samples)</b>    | 0.002                                                   | nd           | nd           | nd       | nd        | 0.001        | nd     | 0.001        | 0.001        |
| <b>max (all samples)</b>    | 0.256                                                   | 0.318        | 0.263        | nd       | nd        | 0.060        | nd     | 0.093        | 0.085        |

## **Section S8: Additional details about the clothing items analyzed for PFAS**

Clothing items were not always stored in the same drawer, stack, or even in the same room as the folded cloth pieces. The clothing items from Home 18 and 82 had been stored in plastic containers in the homes for an extended period of time, prior to the IPA Campaign and their donation for extraction. The clothing items from Homes 30, 35, and 59 were kept in the same dresser as the folded cloth, but in different drawers. As indicated before, even small changes in the proximity to PFAS sources in a dresser drawer can alter the resulting PFAS concentration profile in the clothing material significantly. Although the clothing items were all 100% cotton, it is not known what kind of surface treatments the fabrics may have undergone as part of their manufacture and processing. Surface treatments can have an effect on the hygroscopicity of the cotton fibers, which will in turn affect cloth-air partitioning of PFAS, making some fibers more sorptive for certain PFAS. Additionally, the clothing items have been laundered with different kinds of detergent and their long-term purchase and storage history is not known. It is likely that several, or all of these factors, contributed to the differences in measured PFAS concentration profiles between the clothing items and the folded cloth.

**Table S23:** Variability of neutral PFAS in total air and gas phase samples across and within homes. AHV: Across-home variability, WHV: Within-home variability. Bold print indicates the larger of AHV and WHV

| Analyte   | Total-air samples                           |                              |                                             |                              | Gas-phase samples                           |                              |                                             |                              |
|-----------|---------------------------------------------|------------------------------|---------------------------------------------|------------------------------|---------------------------------------------|------------------------------|---------------------------------------------|------------------------------|
|           | AHV (pooled std. dev., ng m <sup>-3</sup> ) | Coefficient of variation (%) | WHV (pooled std. dev., ng m <sup>-3</sup> ) | Coefficient of variation (%) | AHV (pooled std. dev., ng m <sup>-3</sup> ) | Coefficient of variation (%) | WHV (pooled std. dev., ng m <sup>-3</sup> ) | Coefficient of variation (%) |
| 6:2 FTOH  | 10                                          | 78%                          | 12                                          | <b>94%</b>                   | 7.7                                         | 73%                          | 11                                          | <b>101%</b>                  |
| 8:2 FTOH  | 13                                          | 84%                          | 23                                          | <b>150%</b>                  | 11                                          | 84%                          | 18                                          | <b>139%</b>                  |
| 10:2 FTOH | 1.5                                         | 67%                          | 1.9                                         | <b>89%</b>                   | 1.3                                         | 70%                          | 1.48                                        | <b>78%</b>                   |
| 8:2 FTAC  | 0.29                                        | 159%                         | 0.55                                        | <b>307%</b>                  | 0.19                                        | 314%                         | 0.19                                        | <b>317%</b>                  |
| 10:2 FTAC | 0.10                                        | 184%                         | 0.19                                        | <b>334%</b>                  | 0.076                                       | 311%                         | 0.081                                       | <b>332%</b>                  |
| MeFOSA    | 0                                           | NA                           | 0                                           | NA                           | 0                                           | NA                           | 0.00                                        | NA                           |
| EtFOSA    | 0.11                                        | 106%                         | 0.12                                        | <b>113%</b>                  | 0.10                                        | 124%                         | 0.15                                        | <b>178%</b>                  |
| MeFOSE    | 0.82                                        | <b>138%</b>                  | 0.22                                        | 37%                          | 0.35                                        | <b>94%</b>                   | 0.20                                        | 52%                          |
| EtFOSE    | 0.081                                       | 42%                          | 0.14                                        | <b>74%</b>                   | 0.10                                        | 75%                          | 0.16                                        | <b>115%</b>                  |

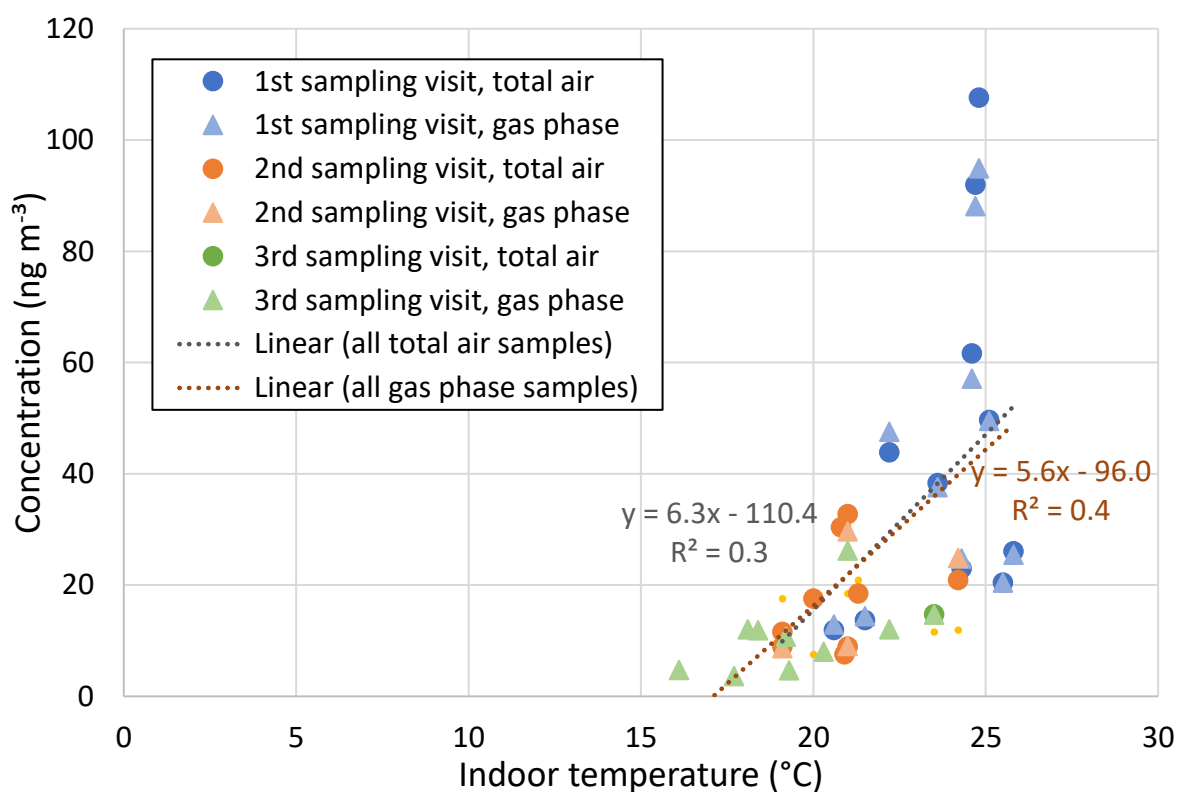

**Figure S16:** Concentrations of neutral PFAS in air during the first, second, and third sampling visits and average indoor temperature during sampling.

**Table S24:** Spearman rank correlation coefficients for neutral PFAS measured in total air with other neutral PFAS species, building characteristics, and environmental conditions.

|                                     | 6:2 FTOH | 8:2 FTOH | 10:2 FTOH | 8:2 FTAC | 10:2 FTAC | EtFOA  | MeFOA | MeFOSE | EtFOSE | Σ(neutral PFAS)_air | Σ(FTOHs)_air | Σ(FOSEs)_air | Avg indoor T (°C) | Avg indoor RH (%) | Avg outdoor T (°C) | Avg outdoor RH (%) | ΔT (indoor-outdoor) (°C) | ACH (h <sup>-1</sup> ) | Window opening (#) | T I/O ratio | RH I/O ratio | Building volume V (m <sup>3</sup> ) | Home age (yrs) | Occupants (#) | Pets (#) | Flooring type in main living area* |  |
|-------------------------------------|----------|----------|-----------|----------|-----------|--------|-------|--------|--------|---------------------|--------------|--------------|-------------------|-------------------|--------------------|--------------------|--------------------------|------------------------|--------------------|-------------|--------------|-------------------------------------|----------------|---------------|----------|------------------------------------|--|
| 6:2 FTOH                            | 1.000    |          |           |          |           |        |       |        |        |                     |              |              |                   |                   |                    |                    |                          |                        |                    |             |              |                                     |                |               |          |                                    |  |
| 8:2 FTOH                            | 0.664    | 1.000    |           |          |           |        |       |        |        |                     |              |              |                   |                   |                    |                    |                          |                        |                    |             |              |                                     |                |               |          |                                    |  |
| 10:2 FTOH                           | 0.592    | 0.704    | 1.000     |          |           |        |       |        |        |                     |              |              |                   |                   |                    |                    |                          |                        |                    |             |              |                                     |                |               |          |                                    |  |
| 8:2 FTAC                            | -0.086   | -0.345   | -0.053    | 1.000    |           |        |       |        |        |                     |              |              |                   |                   |                    |                    |                          |                        |                    |             |              |                                     |                |               |          |                                    |  |
| 10:2 FTAC                           | -0.027   | -0.288   | 0.015     | 0.977    | 1.000     |        |       |        |        |                     |              |              |                   |                   |                    |                    |                          |                        |                    |             |              |                                     |                |               |          |                                    |  |
| EtFOA                               | 0.008    | 0.131    | 0.065     | 0.426    | 0.454     | 1.000  |       |        |        |                     |              |              |                   |                   |                    |                    |                          |                        |                    |             |              |                                     |                |               |          |                                    |  |
| MeFOA                               | NA       | NA       | NA        | NA       | NA        | NA     | NA    |        |        |                     |              |              |                   |                   |                    |                    |                          |                        |                    |             |              |                                     |                |               |          |                                    |  |
| MeFOSE                              | 0.157    | 0.023    | 0.283     | -0.151   | -0.181    | -0.146 | NA    | 1.000  |        |                     |              |              |                   |                   |                    |                    |                          |                        |                    |             |              |                                     |                |               |          |                                    |  |
| EtFOSE                              | -0.264   | -0.510   | -0.109    | 0.514    | 0.508     | 0.378  | NA    | 0.392  | 1.000  |                     |              |              |                   |                   |                    |                    |                          |                        |                    |             |              |                                     |                |               |          |                                    |  |
| Σ(neutral PFAS)                     | 0.830    | 0.925    | 0.803     | -0.249   | -0.187    | 0.070  | NA    | 0.099  | -0.408 | 1.000               |              |              |                   |                   |                    |                    |                          |                        |                    |             |              |                                     |                |               |          |                                    |  |
| Σ(FTOHs)                            | 0.836    | 0.922    | 0.787     | -0.249   | -0.187    | 0.076  | NA    | 0.066  | -0.438 | 0.997               | 1.000        |              |                   |                   |                    |                    |                          |                        |                    |             |              |                                     |                |               |          |                                    |  |
| Σ(FOSEs)                            | 0.091    | -0.096   | 0.190     | 0.064    | 0.036     | -0.033 | NA    | 0.948  | 0.564  | -0.001              | -0.038       | 1.000        |                   |                   |                    |                    |                          |                        |                    |             |              |                                     |                |               |          |                                    |  |
| Avg indoor T (°C)                   | 0.452    | 0.687    | 0.374     | -0.573   | -0.569    | -0.217 | NA    | -0.055 | -0.598 | 0.660               | 0.665        | -0.178       | 1.000             |                   |                    |                    |                          |                        |                    |             |              |                                     |                |               |          |                                    |  |
| Avg indoor RH (%)                   | 0.284    | 0.168    | 0.082     | -0.284   | -0.220    | -0.202 | NA    | -0.001 | -0.218 | 0.192               | 0.204        | -0.097       | 0.097             | 1.000             |                    |                    |                          |                        |                    |             |              |                                     |                |               |          |                                    |  |
| Avg outdoor T (°C)                  | 0.405    | 0.675    | 0.236     | -0.672   | -0.656    | -0.119 | NA    | -0.164 | -0.591 | 0.599               | 0.606        | -0.309       | 0.923             | 0.191             | 1.000              |                    |                          |                        |                    |             |              |                                     |                |               |          |                                    |  |
| Avg outdoor RH (%)                  | 0.490    | 0.471    | 0.123     | -0.613   | -0.575    | -0.264 | NA    | -0.016 | -0.565 | 0.404               | 0.432        | -0.210       | 0.463             | 0.410             | 0.555              | 1.000              |                          |                        |                    |             |              |                                     |                |               |          |                                    |  |
| ΔT (indoor-outdoor) (°C)            | -0.386   | -0.593   | -0.056    | 0.699    | 0.676     | 0.092  | NA    | 0.175  | 0.604  | -0.484              | -0.497       | 0.327        | -0.725            | -0.261            | -0.906             | -0.658             | 1.000                    |                        |                    |             |              |                                     |                |               |          |                                    |  |
| ACH (h <sup>-1</sup> )              | 0.225    | 0.303    | 0.006     | -0.186   | -0.127    | 0.343  | NA    | -0.200 | -0.164 | 0.277               | 0.274        | -0.151       | 0.346             | 0.112             | 0.331              | 0.060              | -0.212                   | 1.000                  |                    |             |              |                                     |                |               |          |                                    |  |
| Window opening (#)                  | -0.189   | -0.337   | -0.099    | -0.036   | -0.103    | -0.037 | NA    | 0.018  | 0.092  | -0.251              | -0.265       | 0.043        | -0.043            | 0.033             | -0.120             | -0.408             | 0.198                    | 0.220                  | 1.000              |             |              |                                     |                |               |          |                                    |  |
| T I/O ratio                         | -0.382   | -0.573   | -0.058    | 0.688    | 0.678     | 0.122  | NA    | 0.169  | 0.636  | -0.475              | -0.490       | 0.331        | -0.736            | -0.222            | -0.903             | -0.644             | 0.993                    | -0.168                 | 0.172              | 1.000       |              |                                     |                |               |          |                                    |  |
| RH I/O ratio                        | -0.078   | -0.282   | -0.092    | 0.202    | 0.233     | -0.078 | NA    | -0.001 | 0.252  | -0.182              | -0.194       | 0.061        | -0.266            | 0.688             | -0.243             | -0.339             | 0.247                    | 0.053                  | 0.367              | 0.277       | 1.000        |                                     |                |               |          |                                    |  |
| Building volume V (m <sup>3</sup> ) | 0.054    | 0.042    | 0.224     | -0.257   | -0.271    | -0.198 | NA    | 0.520  | 0.066  | 0.124               | 0.110        | 0.506        | -0.012            | -0.144            | -0.095             | 0.137              | 0.106                    | -0.197                 | -0.065             | 0.102       | -0.235       | 1.000                               |                |               |          |                                    |  |
| Home age (yrs)                      | 0.048    | -0.104   | -0.214    | 0.312    | 0.281     | 0.080  | NA    | -0.536 | -0.042 | -0.113              | -0.101       | -0.541       | 0.024             | 0.051             | 0.125              | -0.073             | -0.089                   | 0.078                  | 0.039              | -0.103      | 0.164        | -0.844                              | 1.000          |               |          |                                    |  |
| Occupants (#)                       | -0.132   | 0.246    | 0.250     | 0.122    | 0.122     | 0.426  | NA    | -0.229 | 0.033  | 0.116               | 0.129        | -0.238       | 0.067             | 0.116             | 0.137              | 0.096              | -0.105                   | -0.207                 | -0.176             | -0.082      | -0.005       | -0.018                              | -0.023         | 1.000         |          |                                    |  |
| Pets (#)                            | 0.134    | -0.100   | -0.079    | -0.355   | -0.296    | -0.457 | NA    | 0.413  | 0.002  | -0.045              | -0.054       | 0.296        | -0.013            | 0.272             | 0.101              | 0.214              | -0.230                   | -0.315                 | -0.213             | -0.246      | 0.161        | 0.095                               | -0.076         | -0.407        | 1.000    |                                    |  |
| Flooring type in main living area*  | 0.364    | 0.192    | 0.150     | 0.290    | 0.245     | -0.186 | NA    | -0.025 | -0.279 | 0.217               | 0.230        | -0.059       | 0.141             | -0.117            | 0.033              | 0.150              | 0.044                    | -0.025                 | -0.311             | -0.001      | -0.237       | -0.310                              | 0.491          | -0.266        | 0.011    | 1.000                              |  |

**Table S25:** Spearman rank correlation coefficients for neutral PFAS measured in the gas phase with other neutral PFAS species, building characteristics, and environmental conditions.

|                                     | 6:2 FTOH | 8:2 FTOH | 10:2 FTOH | 8:2 FTAC | 10:2 FTAC | EtFOFA | MeFOFA | MeFOSE | EtFOSE | Σ(neutral PFAS)_gas | Σ(FTOHs)_gas | Σ(FOSEs)_gas | Avg indoor T (°C) | Avg indoor RH (%) | Avg outdoor T (°C) | Avg outdoor RH (%) | ΔT (indoor-outdoor) (°C) | ACH (h <sup>-1</sup> ) | Window opening (#) | T I/O ratio | RH I/O ratio | Building volume V (m <sup>3</sup> ) | Home age (yrs) | Occupants (#) | Pets (#) | Flooring type in main living area* |  |
|-------------------------------------|----------|----------|-----------|----------|-----------|--------|--------|--------|--------|---------------------|--------------|--------------|-------------------|-------------------|--------------------|--------------------|--------------------------|------------------------|--------------------|-------------|--------------|-------------------------------------|----------------|---------------|----------|------------------------------------|--|
| 6:2 FTOH                            | 1.000    |          |           |          |           |        |        |        |        |                     |              |              |                   |                   |                    |                    |                          |                        |                    |             |              |                                     |                |               |          |                                    |  |
| 8:2 FTOH                            | 0.770    | 1.000    |           |          |           |        |        |        |        |                     |              |              |                   |                   |                    |                    |                          |                        |                    |             |              |                                     |                |               |          |                                    |  |
| 10:2 FTOH                           | 0.595    | 0.727    | 1.000     |          |           |        |        |        |        |                     |              |              |                   |                   |                    |                    |                          |                        |                    |             |              |                                     |                |               |          |                                    |  |
| 8:2 FTAC                            | -0.083   | -0.267   | -0.077    | 1.000    |           |        |        |        |        |                     |              |              |                   |                   |                    |                    |                          |                        |                    |             |              |                                     |                |               |          |                                    |  |
| 10:2 FTAC                           | 0.050    | -0.098   | 0.072     | 0.882    | 1.000     |        |        |        |        |                     |              |              |                   |                   |                    |                    |                          |                        |                    |             |              |                                     |                |               |          |                                    |  |
| EtFOFA                              | 0.073    | 0.230    | -0.017    | -0.028   | 0.102     | 1.000  |        |        |        |                     |              |              |                   |                   |                    |                    |                          |                        |                    |             |              |                                     |                |               |          |                                    |  |
| MeFOFA                              | NA       | NA       | NA        | NA       | NA        | NA     | NA     |        |        |                     |              |              |                   |                   |                    |                    |                          |                        |                    |             |              |                                     |                |               |          |                                    |  |
| MeFOSE                              | 0.121    | 0.201    | 0.350     | -0.045   | 0.119     | 0.006  | NA     | 1.000  |        |                     |              |              |                   |                   |                    |                    |                          |                        |                    |             |              |                                     |                |               |          |                                    |  |
| EtFOSE                              | -0.262   | -0.195   | -0.025    | 0.234    | 0.416     | 0.135  | NA     | 0.572  | 1.000  |                     |              |              |                   |                   |                    |                    |                          |                        |                    |             |              |                                     |                |               |          |                                    |  |
| Σ(neutral PFAS)                     | 0.878    | 0.937    | 0.804     | -0.182   | -0.016    | 0.141  | NA     | 0.255  | -0.153 | 1.000               |              |              |                   |                   |                    |                    |                          |                        |                    |             |              |                                     |                |               |          |                                    |  |
| Σ(FTOHs)                            | 0.893    | 0.935    | 0.772     | -0.169   | -0.016    | 0.147  | NA     | 0.195  | -0.213 | 0.994               | 1.000        |              |                   |                   |                    |                    |                          |                        |                    |             |              |                                     |                |               |          |                                    |  |
| Σ(FOSEs)                            | 0.042    | 0.146    | 0.301     | 0.034    | 0.206     | 0.027  | NA     | 0.955  | 0.728  | 0.188               | 0.122        | 1.000        |                   |                   |                    |                    |                          |                        |                    |             |              |                                     |                |               |          |                                    |  |
| Avg indoor T (°C)                   | 0.637    | 0.828    | 0.561     | -0.326   | -0.256    | 0.061  | NA     | 0.096  | -0.266 | 0.785               | 0.777        | 0.040        | 1.000             |                   |                    |                    |                          |                        |                    |             |              |                                     |                |               |          |                                    |  |
| Avg indoor RH (%)                   | 0.418    | 0.542    | 0.374     | -0.247   | -0.069    | 0.285  | NA     | 0.018  | -0.166 | 0.467               | 0.474        | 0.032        | 0.467             | 1.000             |                    |                    |                          |                        |                    |             |              |                                     |                |               |          |                                    |  |
| Avg outdoor T (°C)                  | 0.620    | 0.793    | 0.436     | -0.355   | -0.233    | 0.303  | NA     | -0.018 | -0.273 | 0.731               | 0.742        | -0.085       | 0.910             | 0.548             | 1.000              |                    |                          |                        |                    |             |              |                                     |                |               |          |                                    |  |
| Avg outdoor RH (%)                  | 0.485    | 0.552    | 0.245     | -0.253   | -0.314    | 0.193  | NA     | -0.288 | -0.593 | 0.451               | 0.474        | -0.385       | 0.569             | 0.435             | 0.590              | 1.000              |                          |                        |                    |             |              |                                     |                |               |          |                                    |  |
| ΔT (indoor-outdoor) (°C)            | -0.610   | -0.722   | -0.279    | 0.379    | 0.261     | -0.387 | NA     | 0.023  | 0.299  | -0.652              | -0.677       | 0.109        | -0.767            | -0.567            | -0.937             | -0.634             | 1.000                    |                        |                    |             |              |                                     |                |               |          |                                    |  |
| ACH (h <sup>-1</sup> )              | -0.235   | -0.154   | -0.328    | 0.020    | -0.069    | 0.407  | NA     | -0.278 | -0.031 | -0.278              | -0.269       | -0.155       | -0.155            | -0.136            | -0.155             | -0.078             | 0.206                    | 1.000                  |                    |             |              |                                     |                |               |          |                                    |  |
| Window opening (#)                  | -0.009   | -0.176   | 0.169     | -0.178   | -0.194    | -0.273 | NA     | 0.050  | 0.019  | -0.061              | -0.075       | 0.062        | -0.101            | 0.158             | -0.082             | -0.169             | 0.089                    | -0.081                 | 1.000              |             |              |                                     |                |               |          |                                    |  |
| T I/O ratio                         | -0.631   | -0.735   | -0.311    | 0.358    | 0.251     | -0.331 | NA     | 0.051  | 0.321  | -0.672              | -0.697       | 0.133        | -0.789            | -0.555            | -0.942             | -0.662             | 0.992                    | 0.239                  | 0.089              | 1.000       |              |                                     |                |               |          |                                    |  |
| RH I/O ratio                        | -0.005   | -0.135   | -0.002    | -0.077   | 0.111     | -0.039 | NA     | 0.254  | 0.440  | -0.050              | -0.056       | 0.345        | -0.240            | 0.308             | -0.175             | -0.588             | 0.144                    | -0.062                 | 0.399              | 0.195       | 1.000        |                                     |                |               |          |                                    |  |
| Building volume V (m <sup>3</sup> ) | 0.051    | 0.124    | 0.215     | -0.373   | -0.395    | -0.096 | NA     | 0.458  | -0.047 | 0.196               | 0.166        | 0.290        | 0.083             | -0.091            | -0.033             | -0.041             | 0.009                    | -0.191                 | 0.130              | 0.045       | 0.049        | 1.000                               |                |               |          |                                    |  |
| Home age (yrs)                      | 0.000    | -0.175   | -0.191    | 0.379    | 0.385     | 0.027  | NA     | -0.497 | 0.054  | -0.196              | -0.169       | -0.370       | -0.140            | -0.129            | -0.041             | 0.026              | 0.080                    | 0.165                  | -0.055             | 0.058       | -0.045       | -0.860                              | 1.000          |               |          |                                    |  |
| Occupants (#)                       | -0.184   | 0.116    | 0.212     | -0.073   | -0.062    | 0.052  | NA     | -0.070 | 0.140  | 0.070               | 0.049        | 0.002        | 0.080             | 0.123             | 0.081              | 0.035              | -0.023                   | -0.216                 | -0.005             | -0.019      | 0.063        | 0.054                               | -0.086         | 1.000         |          |                                    |  |
| Pets (#)                            | 0.000    | -0.165   | -0.270    | 0.045    | 0.084     | 0.023  | NA     | 0.246  | 0.240  | -0.126              | -0.150       | 0.237        | -0.144            | -0.106            | -0.111             | -0.213             | 0.024                    | -0.147                 | -0.398             | 0.019       | 0.132        | -0.010                              | -0.042         | -0.400        | 1.000    |                                    |  |
| Flooring type in main living area*  | 0.339    | 0.263    | 0.211     | 0.100    | 0.207     | 0.004  | NA     | -0.071 | -0.071 | 0.241               | 0.243        | -0.033       | 0.122             | -0.134            | 0.023              | 0.191              | 0.022                    | 0.203                  | -0.305             | 0.002       | -0.163       | -0.305                              | 0.499          | -0.291        | 0.068    | 1.000                              |  |

## References

1. Bekö, G.; Lund, T.; Nors, F.; Toftum, J.; Clausen, G., Ventilation rates in the bedrooms of 500 Danish children. *Build. Environ.* **2010**, *45*, (10), 2289-2295.
2. Lei, Y. D.; Wania, F.; Mathers, D.; Mabury, S. A., Determination of Vapor Pressures, Octanol–Air, and Water–Air Partition Coefficients for Polyfluorinated Sulfonamide, Sulfonamidoethanols, and Telomer Alcohols. *Journal of Chemical & Engineering Data* **2004**, *49*, (4), 1013-1022.
3. Stock, N. L.; Ellis, D. A.; Deleebeeck, L.; Muir, D. C. G.; Mabury, S. A., Vapor Pressures of the Fluorinated Telomer Alcohols - Limitations of Estimation Methods. *Environ. Sci. Technol.* **2004**, *38*, 1693-1699.
4. Shoeib, M.; Harner, T.; Ikononou, M.; Kannan, K., Indoor and Outdoor Air Concentrations and Phase Partitioning of Perfluoroalkyl Sulfonamides and Polybrominated Diphenyl Ethers. *Environ. Sci. Technol.* **2004**, *38*, 1313-1320.
5. Kim, M.; Li, L. Y.; Grace, J. R.; Yue, C., Selecting reliable physicochemical properties of perfluoroalkyl and polyfluoroalkyl substances (PFASs) based on molecular descriptors. *Environmental Pollution* **2015**, *196*, 462-472.
6. USEPA CompTox Chemicals Dashboard. <https://comptox.epa.gov/dashboard/> (Apr 3, 2022, 2022), 2022.
7. Goss, K.-U.; Bronner, G.; Harner, T.; Hertel, M.; Schmidt, T. C., The Partition Behavior of Fluorotelomer Alcohols and Olefins. *Environ. Sci. Technol.* **2006**, *40*, 3572-3577.
8. Thuens, S.; Dreyer, A.; Sturm, R.; Temme, C.; Ebinghaus, R., Determination of the Octanol-Air Partition Coefficients (Koa) of Fluorotelomer Alcohols. *Journal of Chemical & Engineering Data* **2008**, *53*, (1), 223-227.
9. Dreyer, A.; Langer, V.; Ebinghaus, R., Determination of Octanol-Air Partition Coefficients (Koa) of Fluorotelomer Acrylates, Perfluoroalkyl Sulfonamides, and Perfluoroalkylsulfonamido Ethanols. *J. Chem. Eng. Data* **2009**, *54*, 3022-3025.
10. Salthammer, T.; Grimme, S.; Stahn, M.; Hohm, U.; Palm, W.-U., Quantum Chemical Calculation and Evaluation of Partition Coefficients for Classical and Emerging Environmentally Relevant Organic Compounds. *Environmental Science & Technology* **2022**, *56*, (1), 379-391.
11. DyStar, Product Information Auxiliaries: Evo Soft QEB. In Star L.P. Auxiliaries: Charlotte, NC, 2011.
12. Portolés, T.; Rosales, L. E.; Sancho, J. V.; Santos, F. J.; Moyano, E., Gas chromatography–tandem mass spectrometry with atmospheric pressure chemical ionization for fluorotelomer alcohols and perfluorinated sulfonamides determination. *Journal of Chromatography A* **2015**, *1413*, 107-116.
13. Dimzon, I. K.; Westerveld, J.; Gremmel, C.; Frömel, T.; Knepper, T. P.; de Voogt, P., Sampling and simultaneous determination of volatile per- and polyfluoroalkyl substances in wastewater treatment plant air and water. *Anal. Bioanal. Chem.* **2017**, *409*, 1395-1404.
14. Bach, C.; Boiteux, V.; Hemard, J.; Colin, A.; Rosin, C.; Munoz, J.-F.; Dauchy, X., Simultaneous determination of perfluoroalkyl iodides, perfluoroalkane sulfonamides, fluorotelomer alcohols, fluorotelomer iodides and fluorotelomer acrylates and methacrylates in water and sediments using solid-phase microextraction-gas chromatography/mass spectrometry. *J. Chromatogr. A* **2016**, *1448*, 98-106.
15. Shoeib, M.; Harner, T.; Wilford, B. H.; Jones, K. C.; Zhu, J., Perfluorinated Sulfonamides in Indoor and Outdoor Air and Indoor Dust: Occurrence, Partitioning, and Human Exposure. *Environ. Sci. Technol.* **2005**, *39*, (17), 6599-6606.
16. Liu, W.; Takahashi, S.; Sakuramachi, Y.; Harada, K. H.; Koizumi, A., Polyfluorinated telomers in indoor air of Japanese houses. *Chemosphere* **2013**, *90*, 1672-1677.
17. Strynar, M. J.; Lindstrom, A. B., Perfluorinated Compounds in House Dust from Ohio and North Carolina, USA. *Environmental Science & Technology* **2008**, *42*, (10), 3751-3756.



18. van der Veen, I.; Hanning, A.-C.; Stare, A.; Leonards, P. E. G.; de Boer, J.; Weiss, J. M., The effect of weathering on per- and polyfluoroalkyl substances (PFASs) from durable water repellent (DWR) clothing. *Chemosphere* **2020**, *249*, (126100), 1-9.
19. Morales-McDevitt, M. E.; Bečanová, J.; Blum, A.; Bruton, T. A.; Vojta, Š.; Woodward, M.; Lohmann, R., The Air That We Breathe: Neutral and Volatile PFAS in Indoor Air. *Environmental Science & Technology Letters* **2021**, *8*, (10), 897-902.
20. Winkens, K.; Koponen, J.; Schuster, J.; Shoeib, M.; Vestergren, R.; Berger, U.; Karvonen, A. M.; Pekkanen, J.; Kiviranta, H.; Cousins, I. T., Perfluoroalkyl acids and their precursors in indoor air sampled in children's bedrooms. *Environmental Pollution* **2017**, *222*, 423-432.
21. Yao, Y.; Zhao, Y.; Sun, H.; Chang, S.; Zhu, L.; Alder, A. C.; Kannan, K., Per- and Polyfluoroalkyl Substances (PFASs) in Indoor Air and Dust from Homes and Various Microenvironments in China: Implications for Human Exposure. *Environ. Sci. Technol.* **2018**, *52*, (5), 3156-3166.
22. Fromme, H.; Dreyer, A.; Dietrich, S.; Fembacher, L.; Lahrz, T.; Völkel, W., Neutral polyfluorinated compounds in indoor air in Germany – The LUPE 4 study. *Chemosphere* **2015**, *139*, 572-578.
23. Kim, S.-K.; Shoeib, M.; Kim, K.-S.; Park, J.-E., Indoor and outdoor poly- and perfluoroalkyl substances (PFASs) in Korea determined by passive air sampler. *Environmental Pollution* **2012**, *162*, 144-150.
24. Haug, L. S.; Huber, S.; Schlabach, M.; Becher, G.; Thomsen, C., Investigation on Per- and Polyfluorinated Compounds in Paired Samples of House Dust and Indoor Air from Norwegian Homes. *Environ. Sci. Technol.* **2011**, *45*, 7991-7998.
25. Shoeib, M.; Harner, T.; Webster, G. M.; Lee, S. C., Indoor Sources of Poly- and Perfluorinated Compounds (PFCS) in Vancouver, Canada: Implications for Human Exposure. *Environ. Sci. Technol.* **2011**, *45*, (19), 7999-8005.
26. Goosey, E.; Harrad, S., Perfluoroalkyl substances in UK indoor and outdoor air: Spatial and seasonal variation, and implications for human exposure. *Environ. Int.* **2012**, *45*, 86-90.
27. Weschler, C. J.; Nazaroff, W. W., Semivolatile organic compounds in indoor environments. *Atmos. Environ.* **2008**, *42*, (40), 9018-9040.
28. Cano-Ruiz, J. A.; Kong, D.; Balas, R. B.; Nazaroff, W. W., Removal of Reactive Gases at Indoor Surfaces: Combining Mass Transport and Surface Kinetics. *Atmospheric Environment. Part A. General Topics* **1993**, *27A*, (13), 2039-2050.
29. Morrison, G. C.; Zhao, P.; Kasthuri, L., The Spatial Distribution of Pollutant Transport to and from Indoor Surfaces. *Atmospheric Environment* **2006**, *40*, (20), 3677-3685.
30. Morrison, G. C.; Li, H.; Mishra, S.; Buechlein, M., Airborne phthalate partitioning to cotton clothing. *Atmos. Environ.* **2015**, *115*, 149-152.
31. Cao, J.; Weschler, C. J.; Luo, J.; Zhang, Y., Cm-History Method, a Novel Approach to Simultaneously Measure Source and Sink Parameters Important for Estimating Indoor Exposures to Phthalates. *Environ. Sci. Technol.* **2016**, *50*, (2), 825-834.
32. Saini, A.; Okeme, J. O.; Mark Parnis, J.; McQueen, R. H.; Diamond, M. L., From air to clothing: characterizing the accumulation of semi-volatile organic compounds to fabrics in indoor environments. *Indoor Air* **2017**, *27*, 631-641.
33. Eftekhari, A.; Morrison, G., A high throughput method for measuring cloth-air equilibrium distribution ratios for SVOCs present in indoor environments. *Talanta* **2018**, *183*, 250-257.
34. Morrison, G.; Shakila, N. V.; Parker, K., Accumulation of gas-phase methamphetamine on clothing, toy fabrics, and skin oil. *Indoor Air* **2015**, *25*, (4), 405-414.
35. Morrison, G.; Andersen, H. V.; Gunnarsen, L.; Voral, D.; Uhde, E.; Kolarik, B., Partitioning of PCBs from air to clothing materials in a Danish apartment. *Indoor Air* **2018**, *28*, (1), 188-197.
36. Yu, J.; Wania, F.; Abbatt, J. P. D., A New Approach to Characterizing the Partitioning of Volatile Organic Compounds to Cotton Fabric. *Environmental Science & Technology* **2022**, *56*, (6), 3365-3374.
